# Supplementary material for: Proteomic analysis of low- and high-grade human colon adenocarcinoma tissues and tissue-derived primary cell lines reveals unique biological functions of tumours and new protein biomarker candidates
Source: Clin Proteomics. 2022 Jul 16;19:27. doi: 10.1186/s12014-022-09364-y (PMC9287856; doi:10.1186/s12014-022-09364-y)
Supplement: Supplementary file 6 — Additional file 6. Lists of all proteins identified in CA tissue-derived primary cell lines and proteins with significantly differential abundance in HGCA cell lines relative to LGCA cell lines. Legend is available on Sheet 1. Abbreviations: LG = low-grade colon adenocarcinoma, HG = high-grade colon adenocarcinoma, NC = normal colon. [file 12014_2022_9364_MOESM6_ESM.xlsx]

## Sheet: Legend
Tab	Description
Protein IDs_Cell lines	List of proteins identified in all cell lines. No peak = not detected; Peak found = low-confidence ID; High = high-confidence ID
Cells HGvLG Up	List of proteins with significantly higher abundance in HGCA cell lines compared to LGCA cell lines
Cells HGvLG Down	List of proteins with significantly lower abundance in HGCA cell lines compared to LGCA cell lines
	n.d. = not detected

## Sheet: Protein IDs_Cell lines
Accession	Description	Sum PEP Score	Coverage [%]	# PSMs	# Unique Peptides	Found in Sample: [S1] F1: Sample, 1, HG, 1	Found in Sample: [S2] F2: Sample, 2, HG, 1	Found in Sample: [S3] F3: Sample, 3, HG, 1	Found in Sample: [S4] F4: Sample, 1, HG, 2	Found in Sample: [S5] F5: Sample, 2, HG, 2	Found in Sample: [S6] F6: Sample, 3, HG, 2	Found in Sample: [S7] F7: Sample, 1, HG, 3	Found in Sample: [S8] F8: Sample, 2, HG, 3	Found in Sample: [S9] F9: Sample, 1, HG, 4	Found in Sample: [S10] F10: Sample, 2, HG, 4	Found in Sample: [S11] F11: Sample, 3, HG, 4	Found in Sample: [S12] F12: Sample, 1, LG, 1	Found in Sample: [S13] F13: Sample, 2, LG, 1	Found in Sample: [S14] F14: Sample, 3, LG, 1	Found in Sample: [S15] F15: Sample, 1, LG, 2	Found in Sample: [S16] F16: Sample, 2, LG, 2	Found in Sample: [S17] F17: Sample, 3, LG, 2	Found in Sample: [S18] F18: Sample, 1, LG, 3	Found in Sample: [S19] F19: Sample, 2, LG, 3	Found in Sample: [S20] F20: Sample, 3, LG, 3	Found in Sample: [S21] F21: Sample, 1, LG, 4	Found in Sample: [S22] F22: Sample, 2, LG, 4	Found in Sample: [S23] F23: Sample, 3, LG, 4	Found in Sample: [S24] F24: Sample, 1, NC, 1	Found in Sample: [S25] F25: Sample, 2, NC, 1	Found in Sample: [S26] F26: Sample, 3, NC, 1	Modifications
O00625	Pirin [OS=Homo sapiens]	13.612	12	23	3	Peak Found	Peak Found	Peak Found	Not Found	Not Found	Not Found	High	High	High	High	High	High	High	High	Peak Found	Peak Found	High	High	High	High	High	High	High	Peak Found	High	High
O14683	Tumor protein p53-inducible protein 11 [OS=Homo sapiens]	16.27	14	20	3	Peak Found	Peak Found	Peak Found	Not Found	Not Found	Not Found	High	High	Not Found	Peak Found	Not Found	High	Peak Found	High	High	High	Peak Found	Peak Found	Peak Found	Peak Found	High	High	High	Not Found	Peak Found	Peak Found
O14874	[3-methyl-2-oxobutanoate dehydrogenase [lipoamide]] kinase, mitochondrial [OS=Homo sapiens]	5.556	5	1	1	Not Found	Not Found	Not Found	Not Found	Not Found	Not Found	Not Found	High	Not Found	Not Found	Not Found	Not Found	Not Found	Not Found	Not Found	Not Found	Not Found	Not Found	Not Found	Not Found	Not Found	Not Found	Not Found	Not Found	Not Found	Not Found
O15231-1	zinc finger protein 185 [OS=Homo sapiens]	127.777	38	88	1	Not Found	Not Found	Not Found	Not Found	Not Found	Not Found	Not Found	Not Found	Not Found	Not Found	Not Found	Not Found	Not Found	Not Found	High	High	High	Not Found	Not Found	Not Found	Not Found	Not Found	Not Found	Not Found	Not Found	Not Found	Met-loss+Acetyl [N-Term]
O43491-4	Isoform 4 of Band 4.1-like protein 2 [OS=Homo sapiens]	205.065	52	348	1	High	High	Peak Found	Not Found	Not Found	Not Found	High	High	Peak Found	Peak Found	Peak Found	High	High	High	Peak Found	Peak Found	Peak Found	Peak Found	Peak Found	Peak Found	Peak Found	Peak Found	Peak Found	Not Found	Peak Found	Not Found	Met-loss+Acetyl [N-Term]
O60282-1	kinesin heavy chain isoform 5C [OS=Homo sapiens]	108.2	14	200	1	Not Found	Not Found	Peak Found	Not Found	Not Found	Not Found	Not Found	Peak Found	Peak Found	Not Found	Not Found	Not Found	Not Found	Not Found	Not Found	Not Found	Not Found	Not Found	Not Found	Not Found	Not Found	Not Found	Not Found	High	Peak Found	Peak Found
O60306	Intron-binding protein aquarius [OS=Homo sapiens]	9.372	2	3	2	Not Found	Not Found	Not Found	Not Found	Not Found	Not Found	Not Found	High	High	Not Found	Peak Found	Not Found	Not Found	Not Found	Not Found	Not Found	Not Found	Not Found	Not Found	Not Found	Not Found	Not Found	Not Found	Not Found	Not Found	Not Found
O60488-1	Long-chain-fatty-acid--CoA ligase 4 [OS=Homo sapiens]	148.903	47	225	19	High	High	High	High	High	High	High	High	High	High	High	High	High	High	High	High	High	High	High	High	High	High	High	High	High	High
O60547-1	GDP-mannose 4,6 dehydratase [OS=Homo sapiens]	9.469	6	6	1	High	Not Found	Not Found	High	Not Found	Not Found	Not Found	Not Found	Not Found	Not Found	Not Found	High	Not Found	Not Found	Peak Found	Not Found	Not Found	High	Not Found	Not Found	High	High	Peak Found	Not Found	Not Found	Not Found
O75122	CLIP-associating protein 2 [OS=Homo sapiens]	12.437	2	11	1	High	High	High	Not Found	Not Found	Not Found	Not Found	Not Found	Not Found	Not Found	Not Found	Not Found	Not Found	Not Found	Not Found	Not Found	Not Found	Not Found	Not Found	Not Found	Not Found	Not Found	Not Found	Not Found	Not Found	Not Found
O75157	TSC22 domain family protein 2 [OS=Homo sapiens]	11.345	3	22	2	High	High	High	High	High	High	High	High	High	High	High	Peak Found	High	Not Found	Peak Found	Peak Found	Not Found	Peak Found	Peak Found	High	Peak Found	Peak Found	Peak Found	Peak Found	Not Found	Peak Found
O75326-1	Semaphorin-7A [OS=Homo sapiens]	104.215	31	58	13	Peak Found	Not Found	Peak Found	Peak Found	High	High	Not Found	Peak Found	Not Found	Peak Found	Peak Found	Peak Found	Peak Found	Peak Found	Not Found	Peak Found	Peak Found	High	Peak Found	High	Peak Found	Peak Found	High	High	High	High
O75508	Claudin-11 [OS=Homo sapiens]	6.458	7	6	1	Not Found	Not Found	Not Found	Not Found	Not Found	Not Found	High	Peak Found	High	High	High	Not Found	Not Found	Not Found	High	Peak Found	Peak Found	Not Found	Not Found	Not Found	Not Found	Not Found	Not Found	Not Found	Not Found	Not Found
O76070	Gamma-synuclein [OS=Homo sapiens]	11.182	44	7	4	Not Found	Not Found	Not Found	High	High	Peak Found	Not Found	Not Found	Peak Found	Not Found	Not Found	High	High	High	Not Found	Not Found	Not Found	High	Peak Found	High	Peak Found	Peak Found	Not Found	Not Found	Not Found	Not Found
O94759-1	Transient receptor potential cation channel subfamily M member 2 [OS=Homo sapiens]	3.923	1	1	1	Not Found	Not Found	Not Found	Not Found	Not Found	Not Found	Peak Found	Peak Found	Peak Found	High	Peak Found	Peak Found	Peak Found	Peak Found	Peak Found	Not Found	Peak Found	Peak Found	Peak Found	Peak Found	Peak Found	Peak Found	Peak Found	Not Found	Peak Found	Not Found
O95070	protein YIF1A [OS=Homo sapiens]	23.7	16	45	3	High	High	High	High	High	Peak Found	High	High	High	High	High	High	High	High	High	High	High	Not Found	High	Peak Found	High	High	High	High	High	High	Met-loss+Acetyl [N-Term]
O95758-1	Isoform 1 of Polypyrimidine tract-binding protein 3 [OS=Homo sapiens]	20.978	9	97	1	Not Found	Not Found	Not Found	Not Found	Not Found	Not Found	Not Found	High	Not Found	Not Found	Not Found	Not Found	Not Found	Not Found	Not Found	Not Found	Not Found	Not Found	Not Found	Not Found	Not Found	Not Found	Not Found	Not Found	Not Found	Not Found
P02679	Fibrinogen gamma chain [OS=Homo sapiens]	4.478	3	2	1	Not Found	Not Found	Not Found	High	High	Peak Found	Not Found	Not Found	Not Found	Not Found	Not Found	Peak Found	Not Found	Not Found	Not Found	Not Found	Not Found	Not Found	Not Found	Not Found	Peak Found	Not Found	Not Found	Not Found	Not Found	Not Found
P02786	Transferrin receptor protein 1 [OS=Homo sapiens]	155.024	38	347	25	High	High	High	High	High	High	High	High	High	High	High	High	High	High	High	High	High	High	High	High	High	High	High	High	High	High
P02795	metallothionein-2 [OS=Homo sapiens]	36.836	67	89	4	High	High	High	High	High	High	High	High	High	High	High	High	Peak Found	High	High	High	High	High	High	High	High	High	High	High	High	High	Acetyl [N-Term]
P04179	Superoxide dismutase [Mn], mitochondrial [OS=Homo sapiens]	203.92	81	303	11	High	High	High	High	High	High	High	High	High	High	High	High	High	High	High	High	High	High	High	High	High	High	High	High	High	High
P04183	Thymidine kinase, cytosolic [OS=Homo sapiens]	9.931	26	6	3	Not Found	Not Found	Not Found	Not Found	Not Found	Not Found	Peak Found	Not Found	High	High	High	Peak Found	Not Found	Not Found	Peak Found	Not Found	Peak Found	Peak Found	Peak Found	Peak Found	Not Found	Not Found	Not Found	Not Found	Not Found	Not Found
P05386	60S acidic ribosomal protein P1 [OS=Homo sapiens]	117.488	81	196	4	High	High	High	High	Not Found	High	High	High	High	High	High	High	High	High	High	High	High	High	High	High	High	High	High	High	High	High	Met-loss+Acetyl [N-Term]
P09601	heme oxygenase 1 [OS=Homo sapiens]	49.706	32	41	6	High	High	High	Peak Found	High	Peak Found	High	High	High	High	High	High	High	Peak Found	High	High	High	High	High	High	High	Peak Found	High	Peak Found	Not Found	Not Found
P09603	Macrophage colony-stimulating factor 1 [OS=Homo sapiens]	2.844	3	1	1	Not Found	Not Found	Not Found	Not Found	Not Found	Not Found	Peak Found	High	Peak Found	Peak Found	Not Found	Not Found	Not Found	Not Found	Not Found	Not Found	Not Found	Not Found	Not Found	Not Found	Not Found	Not Found	Peak Found	Peak Found	Not Found	Not Found
P10316	HLA class I histocompatibility antigen, A-69 alpha chain [OS=Homo sapiens]	173.11	59	337	0	Not Found	Not Found	Not Found	Not Found	Not Found	Not Found	Not Found	Not Found	Not Found	Not Found	Not Found	Not Found	Not Found	Not Found	Not Found	Not Found	Not Found	Not Found	Not Found	Not Found	Not Found	Not Found	Not Found	Not Found	Not Found	Not Found
P11166	Solute carrier family 2, facilitated glucose transporter member 1 [OS=Homo sapiens]	50.043	18	64	7	High	High	High	Not Found	Peak Found	Not Found	High	High	High	High	High	Peak Found	High	Peak Found	High	High	High	Peak Found	High	High	High	High	High	High	High	High
P12111	Collagen alpha-3(VI) chain [OS=Homo sapiens]	1374.68	52	2229	123	High	High	High	High	High	High	High	High	High	High	High	High	High	High	High	High	High	High	High	High	High	High	High	High	High	High
P13726-1	tissue factor [OS=Homo sapiens]	90.834	33	96	7	High	High	High	Not Found	High	High	High	High	High	High	High	Peak Found	Peak Found	Peak Found	Not Found	Peak Found	Peak Found	Not Found	Not Found	Peak Found	High	High	High	High	High	High
P15559-1	NAD(P)H dehydrogenase [quinone] 1 [OS=Homo sapiens]	318.552	66	557	20	High	High	High	High	Peak Found	Peak Found	High	High	High	High	High	High	High	High	High	High	High	High	High	High	High	High	High	High	High	High	Carbamyl [K33]; Acetyl [K61]
P16070	CD44 antigen [OS=Homo sapiens]	265.485	17	1030	16	High	High	High	High	High	High	High	High	High	High	High	High	High	High	High	High	High	High	High	High	High	High	High	High	High	High	Carbamyl [K681; K695]
P16234-1	Platelet-derived growth factor receptor alpha [OS=Homo sapiens]	72.919	20	41	11	Peak Found	High	Peak Found	Peak Found	Peak Found	Peak Found	High	High	Peak Found	Peak Found	High	Not Found	Peak Found	Peak Found	Peak Found	Peak Found	Peak Found	Not Found	Not Found	Not Found	Peak Found	Peak Found	Peak Found	Not Found	Not Found	Peak Found
P16401	Histone H1.5 [OS=Homo sapiens]	112.487	33	566	11	High	High	High	High	High	High	High	High	High	High	High	High	High	High	High	High	High	High	High	High	High	High	High	Peak Found	High	High	Carbamyl [K37; K161]; Met-loss [N-Term]; Met-loss+Acetyl [N-Term]
P18887	DNA repair protein XRCC1 [OS=Homo sapiens]	8.216	7	8	3	High	High	Peak Found	Peak Found	Peak Found	Peak Found	High	High	High	Peak Found	High	Peak Found	Peak Found	Peak Found	High	Peak Found	High	Peak Found	Peak Found	Peak Found	Peak Found	Peak Found	Peak Found	Peak Found	Peak Found	Peak Found
P19320-1	Vascular cell adhesion protein 1 [OS=Homo sapiens]	21.847	6	6	2	Not Found	Not Found	Not Found	Not Found	Not Found	Not Found	High	High	Not Found	Not Found	Not Found	Not Found	Not Found	Not Found	Not Found	Not Found	Not Found	Not Found	Not Found	Not Found	Not Found	Not Found	Not Found	Peak Found	Peak Found	High
P20742	Pregnancy zone protein [OS=Homo sapiens]	28.613	2	86	1	Not Found	Not Found	Not Found	Not Found	Not Found	Not Found	High	High	High	High	High	High	High	High	High	High	High	High	High	High	Peak Found	High	High	High	High	High
P21399	Cytoplasmic aconitate hydratase [OS=Homo sapiens]	302.431	48	456	27	High	High	High	Peak Found	High	High	High	High	High	High	High	High	High	High	High	High	High	High	High	High	High	High	High	High	High	High	Met-loss+Acetyl [N-Term]
P23381	Tryptophan--tRNA ligase, cytoplasmic [OS=Homo sapiens]	435.683	78	735	28	High	High	High	High	High	High	High	High	High	High	High	High	High	High	High	High	High	High	High	High	High	High	High	High	High	High	Met-loss [N-Term]
P26447	Protein S100-A4 [OS=Homo sapiens]	56.117	79	245	7	High	High	High	High	High	High	High	High	High	High	High	High	High	High	High	High	High	High	High	High	High	High	High	High	High	High
P27105	erythrocyte band 7 integral membrane protein [OS=Homo sapiens]	197.01	66	330	15	High	High	High	Peak Found	Peak Found	High	High	High	High	High	High	High	High	High	High	High	High	High	High	High	High	High	High	High	High	High
P27701	CD82 antigen [OS=Homo sapiens]	4.201	5	2	1	Not Found	Not Found	Not Found	Not Found	Not Found	Not Found	High	High	Peak Found	Peak Found	Not Found	Not Found	Not Found	Not Found	Not Found	Not Found	Not Found	Not Found	Not Found	Not Found	Not Found	Peak Found	Peak Found	Peak Found	Not Found	Peak Found
P29466-1	caspase-1 [OS=Homo sapiens]	80.683	39	50	12	High	High	High	Not Found	Not Found	Not Found	High	High	High	High	High	Peak Found	Peak Found	Peak Found	Peak Found	Peak Found	Peak Found	Peak Found	Peak Found	Peak Found	Peak Found	Peak Found	Peak Found	Peak Found	Peak Found	Peak Found
P30479	HLA class I histocompatibility antigen, B-41 alpha chain [OS=Homo sapiens]	108.418	48	160	3	Not Found	Not Found	Not Found	Not Found	Not Found	Not Found	High	High	Not Found	Not Found	Not Found	Peak Found	Peak Found	Peak Found	High	High	High	Peak Found	Peak Found	Peak Found	Peak Found	Peak Found	Peak Found	Not Found	Not Found	Not Found
P32455	Guanylate-binding protein 1 [OS=Homo sapiens]	168.482	49	147	16	High	High	High	Peak Found	High	High	High	High	High	High	High	High	High	High	High	High	High	High	High	High	High	High	High	High	High	High	Met-loss+Acetyl [N-Term]
P35754	Glutaredoxin-1 [OS=Homo sapiens]	98.791	79	87	6	High	High	High	Not Found	Not Found	Not Found	High	High	High	High	High	Peak Found	High	Peak Found	Peak Found	Peak Found	Peak Found	High	High	High	High	High	High	High	High	High	Met-loss+Acetyl [N-Term]
P40306	Proteasome subunit beta type-10 [OS=Homo sapiens]	69.396	31	25	4	Peak Found	High	High	Not Found	Not Found	Peak Found	High	High	Peak Found	Peak Found	High	Peak Found	Peak Found	Peak Found	High	Peak Found	High	Peak Found	High	High	Peak Found	Peak Found	Peak Found	Not Found	Not Found	Not Found
P48507	Glutamate--cysteine ligase regulatory subunit [OS=Homo sapiens]	50.036	36	88	6	High	High	High	High	High	Peak Found	High	High	High	High	High	High	High	High	High	High	High	High	High	High	High	High	High	High	High	High
P48651	phosphatidylserine synthase 1 [OS=Homo sapiens]	4.175	3	3	1	Not Found	Not Found	Not Found	Not Found	Not Found	Not Found	High	High	Peak Found	Peak Found	Peak Found	Not Found	Not Found	Not Found	Not Found	Not Found	Not Found	Not Found	Not Found	Not Found	High	Peak Found	Peak Found	Not Found	Peak Found	Not Found
P49069	calcium signal-modulating cyclophilin ligand [OS=Homo sapiens]	4.489	9	1	1	Not Found	Not Found	Not Found	Not Found	Not Found	Not Found	Not Found	Peak Found	Not Found	Not Found	Not Found	Not Found	Not Found	Not Found	Not Found	Not Found	Not Found	Not Found	Not Found	Not Found	Not Found	Not Found	Not Found	Not Found	High	Peak Found
P50135	Histamine N-methyltransferase [OS=Homo sapiens]	10.714	14	3	2	Not Found	Not Found	Not Found	Not Found	Not Found	Not Found	High	High	Not Found	Not Found	Not Found	Peak Found	Peak Found	Not Found	Not Found	Not Found	Not Found	Not Found	Not Found	Not Found	Not Found	Not Found	Not Found	Not Found	Not Found	Not Found
P52823	Stanniocalcin-1 [OS=Homo sapiens]	4.064	4	2	1	Not Found	Not Found	Not Found	High	High	Peak Found	Not Found	Not Found	Not Found	Not Found	Not Found	Not Found	Not Found	Not Found	Not Found	Not Found	Not Found	Not Found	Not Found	Not Found	Not Found	Not Found	Not Found	Not Found	Not Found	Not Found
P53708	Integrin alpha-8 [OS=Homo sapiens]	13.899	4	8	2	High	High	Peak Found	Peak Found	Peak Found	Peak Found	High	High	Peak Found	Peak Found	Peak Found	High	Peak Found	Peak Found	Peak Found	Peak Found	Peak Found	Peak Found	Peak Found	Peak Found	Peak Found	Peak Found	Peak Found	Peak Found	High	Peak Found
P56159	GDNF family receptor alpha-1 [OS=Homo sapiens]	10.968	5	5	2	Peak Found	High	Peak Found	Peak Found	Peak Found	Not Found	High	High	Peak Found	Not Found	Peak Found	Peak Found	Peak Found	Peak Found	Peak Found	Not Found	Peak Found	Peak Found	Peak Found	Peak Found	Peak Found	Peak Found	Peak Found	Not Found	Not Found	Not Found
P56539	Caveolin-3 [OS=Homo sapiens]	9.005	12	18	1	Peak Found	Peak Found	Peak Found	Peak Found	Peak Found	High	Peak Found	Not Found	Not Found	Peak Found	Not Found	Peak Found	Peak Found	Not Found	Peak Found	Peak Found	Peak Found	Peak Found	Peak Found	Peak Found	Peak Found	Peak Found	Peak Found	Peak Found	Peak Found	Peak Found
P61204	ADP-ribosylation factor 3 [OS=Homo sapiens]	260.732	76	624	2	Not Found	Not Found	Not Found	Not Found	Not Found	Not Found	Peak Found	Not Found	High	High	Peak Found	Not Found	Peak Found	Peak Found	Not Found	Not Found	Not Found	Not Found	Not Found	Not Found	High	Not Found	Not Found	Not Found	Not Found	Peak Found	Carbamyl [K178]
P61587	Rho-related GTP-binding protein RhoE [OS=Homo sapiens]	41.225	33	54	6	High	High	High	Peak Found	Peak Found	Peak Found	High	High	High	High	High	High	High	High	Peak Found	Peak Found	High	Peak Found	Peak Found	High	High	High	High	Peak Found	High	Peak Found
P62487	DNA-directed RNA polymerase II subunit rpb7 [OS=Homo sapiens]	8.758	24	4	2	Peak Found	High	Not Found	Peak Found	High	High	Not Found	Not Found	Not Found	Peak Found	Peak Found	Not Found	Not Found	Not Found	Not Found	Not Found	Not Found	Not Found	High	Not Found	Not Found	Not Found	Not Found	Not Found	Not Found	Not Found
P62745	Rho-related GTP-binding protein RhoB [OS=Homo sapiens]	60.653	41	92	2	Not Found	Not Found	Not Found	Not Found	Not Found	High	High	Not Found	Not Found	High	High	High	Not Found	Not Found	High	Not Found	High	High	High	High	Not Found	Not Found	Not Found	Not Found	Not Found	High
P62987	Ubiquitin-60S ribosomal protein L40 [OS=Homo sapiens]	74.633	45	541	1	High	High	High	Peak Found	Peak Found	Peak Found	High	High	High	High	High	High	High	High	High	High	High	High	High	High	Peak Found	Peak Found	Peak Found	Peak Found	Peak Found	High
P63261	Actin, cytoplasmic 2 [OS=Homo sapiens]	1954.78	97	22907	3	High	Peak Found	High	High	High	High	High	High	High	High	High	High	High	High	High	High	High	High	High	High	High	High	High	High	High	High	Carbamyl [K18; K50; K61; K113; K191; K215; K238; K284; K291; K315; K326; K328; K336; K373]; Acetyl [K50; K113; K215; K291; K336]; Met-loss [N-Term]; Met-loss+Acetyl [N-Term]; Acetyl [N-Term]
P80723	Brain acid soluble protein 1 [OS=Homo sapiens]	430.713	93	898	23	High	High	High	High	High	High	High	High	High	High	High	High	High	High	High	High	High	High	High	High	High	High	High	High	High	High	Acetyl [K210]; Carbamyl [K25; K57; K150]
P98082	Disabled homolog 2 [OS=Homo sapiens]	314.345	52	475	29	High	High	High	High	High	Peak Found	High	High	High	High	High	High	High	High	High	High	High	High	High	High	High	High	High	High	High	High	Met-loss+Acetyl [N-Term]
Q01459	Di-N-acetylchitobiase [OS=Homo sapiens]	7.733	7	2	2	Not Found	Not Found	Not Found	Not Found	Not Found	Not Found	Not Found	Not Found	Not Found	Not Found	Not Found	Not Found	Not Found	Not Found	Not Found	Not Found	Not Found	Not Found	Not Found	Not Found	Not Found	Not Found	Not Found	Peak Found	High	High
Q02539	Histone H1.1 [OS=Homo sapiens]	69.013	32	262	2	Not Found	Not Found	Not Found	Not Found	Not Found	Not Found	High	High	High	High	High	Peak Found	Peak Found	Peak Found	Not Found	Peak Found	Peak Found	Not Found	Not Found	Not Found	Not Found	Peak Found	Not Found	Not Found	Not Found	Not Found	Met-loss+Acetyl [N-Term]
Q03135-2	Isoform 2 of Caveolin-1 [OS=Homo sapiens]	63.082	37	207	1	Peak Found	Peak Found	High	Peak Found	High	High	Peak Found	Peak Found	Peak Found	Peak Found	Peak Found	Peak Found	Peak Found	Peak Found	Peak Found	Peak Found	Peak Found	Peak Found	Peak Found	Peak Found	Peak Found	High	Peak Found	Not Found	Not Found	Not Found	Met-loss+Acetyl [N-Term]
Q05707-1	Collagen alpha-1(XIV) chain [OS=Homo sapiens]	5.186	2	6	2	Peak Found	High	High	Peak Found	Peak Found	Peak Found	High	High	Peak Found	Peak Found	Peak Found	High	Peak Found	Peak Found	Peak Found	Peak Found	Peak Found	Peak Found	Peak Found	Peak Found	Peak Found	Peak Found	Peak Found	Not Found	Peak Found	Peak Found
Q08170	Serine/arginine-rich splicing factor 4 [OS=Homo sapiens]	37.055	11	196	1	Not Found	Not Found	Not Found	Not Found	Not Found	Not Found	Not Found	Not Found	Not Found	Not Found	High	Peak Found	Not Found	Not Found	Not Found	Peak Found	Peak Found	Not Found	Peak Found	Not Found	Not Found	Not Found	Not Found	Not Found	Not Found	Not Found
Q10589	bone marrow stromal antigen 2 [OS=Homo sapiens]	16.335	18	10	3	Peak Found	Peak Found	Peak Found	Not Found	Peak Found	Not Found	High	High	Not Found	Peak Found	Not Found	Not Found	Not Found	Not Found	Not Found	Not Found	Not Found	Not Found	Peak Found	Peak Found	Not Found	Not Found	Not Found	Not Found	Not Found	Not Found
Q12946	Forkhead box protein F1 [OS=Homo sapiens]	20.785	13	10	2	High	Peak Found	Not Found	Not Found	Peak Found	Peak Found	High	High	High	High	High	Peak Found	Peak Found	Not Found	Not Found	Not Found	Not Found	Peak Found	Not Found	Peak Found	Not Found	Not Found	Not Found	Not Found	Not Found	Not Found
Q13427	peptidyl-prolyl cis-trans isomerase g [OS=Homo sapiens]	5.334	2	4	1	Not Found	Not Found	Not Found	Not Found	Not Found	Not Found	High	Peak Found	High	High	High	Not Found	Not Found	Not Found	Not Found	Not Found	Not Found	Not Found	Not Found	Not Found	Not Found	Not Found	Not Found	Not Found	Not Found	Not Found
Q13501-1	sequestosome-1 [OS=Homo sapiens]	344.788	80	497	21	High	High	High	High	High	High	High	High	High	High	High	High	High	High	High	High	High	High	High	High	High	High	High	High	High	High
Q13748-1	tubulin alpha-3C/D chain [OS=Homo sapiens]	942.058	66	5068	1	Peak Found	Peak Found	Peak Found	High	High	High	Not Found	Peak Found	Not Found	Not Found	Not Found	Not Found	Not Found	Peak Found	Not Found	Peak Found	Peak Found	Not Found	Peak Found	Peak Found	Peak Found	Peak Found	Peak Found	Not Found	Not Found	Not Found	Carbamyl [K60; K96; K336; K370]; Acetyl [K96]
Q14151	scaffold attachment factor B2 [OS=Homo sapiens]	87.541	13	99	2	Not Found	Not Found	Not Found	Not Found	Not Found	Not Found	Not Found	Not Found	Not Found	High	Not Found	Not Found	Not Found	Not Found	Not Found	Not Found	Not Found	Not Found	Not Found	Not Found	Not Found	High	Not Found	Not Found	Not Found	Not Found
Q14393-1	Growth arrest-specific protein 6 [OS=Homo sapiens]	26.488	13	18	5	High	High	High	Peak Found	Peak Found	Not Found	High	High	High	High	High	Not Found	Not Found	Not Found	Not Found	Peak Found	Peak Found	Not Found	Peak Found	Peak Found	Peak Found	Peak Found	Peak Found	Peak Found	High	High
Q14571-1	Inositol 1,4,5-trisphosphate receptor type 2 [OS=Homo sapiens]	5.5	0	3	1	Not Found	Not Found	Not Found	Not Found	Not Found	Not Found	Peak Found	Not Found	Not Found	Not Found	Peak Found	Not Found	Not Found	Not Found	Not Found	Not Found	Not Found	Not Found	Not Found	Not Found	Not Found	Not Found	Not Found	High	High	High
Q14914	Prostaglandin reductase 1 [OS=Homo sapiens]	236.553	67	324	18	High	High	High	High	Peak Found	High	High	High	High	High	High	High	High	High	High	High	High	High	High	High	High	High	High	High	High	High
Q15012	Lysosomal-associated transmembrane protein 4A [OS=Homo sapiens]	4.487	12	2	1	Not Found	Not Found	Not Found	Not Found	Not Found	Not Found	Peak Found	Peak Found	Peak Found	Peak Found	High	Peak Found	Peak Found	High	Peak Found	Peak Found	Peak Found	Peak Found	Peak Found	Peak Found	Not Found	Not Found	Not Found	Peak Found	Peak Found	Peak Found
Q15057	Arf-GAP with coiled-coil, ANK repeat and PH domain-containing protein 2 [OS=Homo sapiens]	4.385	4	1	1	Not Found	Not Found	Not Found	Not Found	Not Found	Not Found	Peak Found	Not Found	Not Found	Not Found	Peak Found	Not Found	Not Found	Not Found	Not Found	Not Found	Not Found	Not Found	Not Found	Not Found	Not Found	Not Found	Not Found	Not Found	High	Not Found
Q15758-1	Neutral amino acid transporter B(0) [OS=Homo sapiens]	100.154	33	163	13	High	High	High	High	High	High	High	High	High	High	High	High	High	High	High	High	High	High	High	High	High	High	High	High	High	High
Q16881-1	Thioredoxin reductase 1, cytoplasmic [OS=Homo sapiens]	659.056	63	1242	32	High	High	High	High	High	High	High	High	High	High	High	High	High	High	High	High	High	High	High	High	High	High	High	High	High	High	Carbamyl [K218]
Q3V6T2-1	Girdin [OS=Homo sapiens]	13.008	2	4	3	High	High	Peak Found	Not Found	Not Found	Not Found	Not Found	Not Found	Not Found	Not Found	Not Found	Not Found	Not Found	High	Not Found	High	Not Found	Not Found	Not Found	Not Found	Not Found	Not Found	Not Found	Not Found	Peak Found	Not Found
Q3YBM2	Transmembrane protein 176B [OS=Homo sapiens]	23.636	17	9	4	Not Found	High	Peak Found	Not Found	Not Found	Not Found	High	High	Not Found	Not Found	Not Found	Not Found	Not Found	Not Found	Not Found	Not Found	Not Found	Not Found	Not Found	Not Found	Not Found	Not Found	Not Found	Not Found	Not Found	Not Found
Q494V2-1	Cilia- and flagella-associated protein 100 [OS=Homo sapiens]	4.211	4	3	2	Not Found	Peak Found	Not Found	Peak Found	Peak Found	Peak Found	Not Found	Not Found	Not Found	Not Found	High	Not Found	Not Found	Not Found	Not Found	Not Found	Not Found	Not Found	Not Found	Not Found	Not Found	Not Found	Not Found	Peak Found	High	High
Q4V9L6	Transmembrane protein 119 [OS=Homo sapiens]	24.06	13	22	3	Not Found	Not Found	Not Found	Not Found	Not Found	Not Found	High	High	High	High	High	Not Found	Not Found	High	Not Found	Peak Found	Not Found	Not Found	Not Found	Not Found	High	High	High	Not Found	Not Found	Not Found
Q5QJE6	Deoxynucleotidyltransferase terminal-interacting protein 2 [OS=Homo sapiens]	12.552	4	8	2	High	High	Not Found	High	High	High	Not Found	Not Found	Not Found	Not Found	Not Found	Not Found	Not Found	Not Found	Peak Found	Not Found	Not Found	Not Found	Not Found	High	Peak Found	Not Found	Not Found	Not Found	Not Found	Not Found
Q5T8P6	RNA-binding protein 26 [OS=Homo sapiens]	6.897	3	6	2	Peak Found	Peak Found	High	High	High	Peak Found	Peak Found	Peak Found	High	Peak Found	High	Peak Found	Peak Found	Peak Found	Peak Found	Peak Found	Peak Found	Peak Found	Peak Found	Peak Found	Peak Found	Peak Found	Peak Found	Peak Found	Peak Found	Peak Found
Q5TZA2	Rootletin [OS=Homo sapiens]	4.634	1	16	1	High	High	High	High	High	High	Peak Found	Peak Found	Peak Found	Peak Found	High	High	High	Peak Found	Peak Found	High	Peak Found	Peak Found	Peak Found	Peak Found	Peak Found	High	Peak Found	Peak Found	Peak Found	Peak Found
Q68CZ2-1	Tensin-3 [OS=Homo sapiens]	292.411	40	199	27	High	High	High	Peak Found	Not Found	Peak Found	High	High	High	High	High	Peak Found	Peak Found	Peak Found	High	High	High	High	High	High	High	High	High	High	High	High
Q68DQ2	very large A-kinase anchor protein [OS=Homo sapiens]	9.452	1	1	1	Not Found	Not Found	Not Found	Not Found	Not Found	Not Found	Peak Found	High	Not Found	Not Found	Not Found	Not Found	Not Found	Not Found	Not Found	Not Found	Not Found	Not Found	Not Found	Not Found	Not Found	Not Found	Not Found	Not Found	Not Found	Not Found
Q6EEV6	small ubiquitin-related modifier 4 [OS=Homo sapiens]	21.919	23	109	1	High	Peak Found	High	Peak Found	High	High	High	High	High	High	High	Peak Found	Peak Found	Peak Found	Peak Found	High	High	High	Peak Found	High	Peak Found	High	High	Peak Found	Peak Found	Peak Found
Q6IA86-1	elongator complex protein 2 [OS=Homo sapiens]	9.007	5	5	2	Peak Found	High	High	Not Found	Not Found	Not Found	Not Found	Not Found	Not Found	Not Found	Not Found	Peak Found	Not Found	Not Found	Not Found	Not Found	Not Found	Peak Found	Peak Found	Not Found	High	High	High	Not Found	Not Found	Not Found
Q71DI3	histone H3.2 [OS=Homo sapiens]	151.272	66	781	1	High	High	High	High	High	High	High	High	High	High	High	High	High	High	High	High	High	High	High	High	High	High	High	High	High	High	Carbamyl [K19; K80]; Acetyl [K10; K15; K19; K24]
Q7Z7K0	COX assembly mitochondrial protein homolog [OS=Homo sapiens]	4.938	9	8	1	High	High	High	High	High	High	Peak Found	Peak Found	Not Found	Not Found	Not Found	Peak Found	Peak Found	Peak Found	Peak Found	Peak Found	Peak Found	High	Peak Found	Peak Found	Peak Found	Not Found	Peak Found	Not Found	Not Found	Not Found
Q8IWE4	DCN1-like protein 3 [OS=Homo sapiens]	5.171	15	2	2	Not Found	Peak Found	Not Found	Not Found	Not Found	Not Found	Peak Found	Not Found	Not Found	Not Found	Peak Found	Not Found	Not Found	Not Found	Not Found	High	Not Found	Not Found	Not Found	Not Found	Not Found	Not Found	Not Found	Peak Found	Not Found	High
Q8N4X5	Actin filament-associated protein 1-like 2 [OS=Homo sapiens]	16.367	8	8	4	Not Found	Not Found	Not Found	Not Found	Not Found	Not Found	High	High	High	High	High	High	Not Found	Not Found	Not Found	Not Found	Not Found	Not Found	Not Found	Not Found	Not Found	Not Found	High	Not Found	Not Found	Not Found
Q8N5I4	Dehydrogenase/reductase SDR family member on chromosome X [OS=Homo sapiens]	6.859	5	1	1	Not Found	Not Found	Not Found	Not Found	Not Found	Not Found	Peak Found	Peak Found	Not Found	Not Found	Not Found	Not Found	Not Found	Not Found	Not Found	Not Found	Not Found	Not Found	Not Found	Not Found	Not Found	Not Found	Not Found	High	Peak Found	Peak Found
Q8N6Y2-1	Leucine-rich repeat-containing protein 17 [OS=Homo sapiens]	43.873	25	20	8	Not Found	Not Found	Not Found	Not Found	Not Found	Not Found	Not Found	Not Found	Not Found	Peak Found	Not Found	Not Found	Not Found	Not Found	Not Found	Not Found	Not Found	Not Found	Not Found	Not Found	Not Found	Not Found	Not Found	High	High	High
Q8TAD7	Overexpressed in colon carcinoma 1 protein [OS=Homo sapiens]	21.22	57	14	2	High	Peak Found	High	Peak Found	Peak Found	Peak Found	Peak Found	High	High	High	High	Peak Found	High	High	Peak Found	Peak Found	Peak Found	Peak Found	Peak Found	Peak Found	Peak Found	Peak Found	Peak Found	Peak Found	High	Peak Found
Q8TDN6	Ribosome biogenesis protein BRX1 homolog [OS=Homo sapiens]	55.706	31	56	7	High	Peak Found	High	Not Found	Peak Found	Not Found	High	High	High	High	High	Peak Found	High	Peak Found	Peak Found	High	High	Peak Found	Peak Found	Peak Found	Peak Found	High	Peak Found	High	High	High
Q8TES7	Fas-binding factor 1 [OS=Homo sapiens]	4.356	1	23	1	High	Peak Found	High	High	Peak Found	Peak Found	High	High	High	High	High	Peak Found	High	High	Peak Found	Peak Found	Peak Found	Peak Found	Peak Found	High	High	High	Peak Found	High	Peak Found	High
Q8WUD1	Ras-related protein Rab-2B [OS=Homo sapiens]	59.791	44	180	1	Not Found	Not Found	Not Found	Not Found	Not Found	Not Found	Not Found	Not Found	Peak Found	Peak Found	Peak Found	Not Found	Not Found	Not Found	Not Found	Not Found	Not Found	Not Found	Not Found	Not Found	Not Found	Not Found	Not Found	High	High	High
Q8WUM9	Sodium-dependent phosphate transporter 1 [OS=Homo sapiens]	17.859	5	9	2	Peak Found	Peak Found	Not Found	Peak Found	Not Found	Not Found	Not Found	Not Found	Not Found	Not Found	Peak Found	Not Found	Not Found	Not Found	Not Found	Not Found	Not Found	Not Found	Not Found	Not Found	Not Found	Not Found	Not Found	High	High	High
Q8WWM9	Cytoglobin [OS=Homo sapiens]	32.309	33	14	3	Not Found	Not Found	Not Found	Not Found	Not Found	Not Found	High	High	Peak Found	High	High	Not Found	Not Found	Not Found	Not Found	Not Found	Not Found	Peak Found	Not Found	Not Found	Peak Found	Peak Found	Peak Found	Not Found	Peak Found	Peak Found
Q92633	lysophosphatidic acid receptor 1 [OS=Homo sapiens]	4.693	6	4	2	Peak Found	Peak Found	High	Not Found	Not Found	Not Found	High	High	Not Found	Not Found	Not Found	Not Found	Not Found	Not Found	Not Found	Not Found	Not Found	Not Found	Not Found	Not Found	Not Found	Not Found	Not Found	Not Found	Not Found	Not Found
Q96HP8	transmembrane protein 176A [OS=Homo sapiens]	4.852	5	2	1	Not Found	Not Found	Not Found	Not Found	Not Found	Not Found	High	High	Not Found	Not Found	Not Found	Not Found	Not Found	Not Found	Not Found	Not Found	Not Found	Not Found	Not Found	Not Found	Not Found	Not Found	Not Found	Not Found	Not Found	Not Found
Q96PZ0	pseudouridylate synthase 7 homolog [OS=Homo sapiens]	13.92	7	4	2	Not Found	Not Found	Not Found	Not Found	Not Found	Not Found	Not Found	Not Found	Peak Found	Peak Found	High	High	Not Found	Not Found	High	Not Found	Not Found	Not Found	Not Found	High	Not Found	Not Found	Not Found	Not Found	Not Found	Not Found
Q96QD8	sodium-coupled neutral amino acid transporter 2 [OS=Homo sapiens]	15.179	4	34	1	Not Found	Not Found	Not Found	Not Found	Not Found	Not Found	High	High	High	High	High	High	High	High	High	High	High	High	High	High	High	High	High	High	High	High
Q96RD7-1	Pannexin-1 [OS=Homo sapiens]	18.198	13	11	3	Not Found	Not Found	Not Found	Not Found	Not Found	Not Found	High	High	High	High	High	Peak Found	Peak Found	Peak Found	Peak Found	Not Found	Not Found	Not Found	Peak Found	Peak Found	Not Found	Not Found	Not Found	Peak Found	High	Peak Found	Met-loss+Acetyl [N-Term]
Q96RE7	Nucleus accumbens-associated protein 1 [OS=Homo sapiens]	13.983	10	14	3	Peak Found	High	Peak Found	Peak Found	High	Peak Found	Not Found	Peak Found	High	High	High	Not Found	Peak Found	Peak Found	High	Peak Found	Peak Found	High	High	High	Peak Found	Not Found	Peak Found	Not Found	Not Found	Not Found	Met-loss+Acetyl [N-Term]
Q99643	Succinate dehydrogenase cytochrome b560 subunit, mitochondrial [OS=Homo sapiens]	4.65	9	1	1	Not Found	Not Found	Not Found	Not Found	Not Found	Not Found	High	Not Found	Not Found	Not Found	Not Found	Not Found	Not Found	Not Found	Not Found	Not Found	Not Found	Not Found	Not Found	Not Found	Not Found	Not Found	Not Found	Not Found	Not Found	Not Found
Q99685-1	monoglyceride lipase [OS=Homo sapiens]	131.424	52	208	11	High	High	High	Not Found	Not Found	Not Found	High	High	High	High	High	High	High	High	Peak Found	Peak Found	High	High	High	High	High	High	High	High	High	High
Q99715-1	Collagen alpha-1(XII) chain [OS=Homo sapiens]	592.775	39	746	77	High	High	High	Peak Found	High	High	High	High	High	High	High	High	High	High	High	High	High	High	High	High	High	High	High	High	High	High	Carbamyl [K1324]
Q9BQE5	apolipoprotein L2 [OS=Homo sapiens]	50.655	33	119	7	High	High	High	High	High	High	High	High	High	High	High	High	High	High	High	High	High	High	High	High	High	High	High	High	High	High	Acetyl [N-Term]
Q9BQJ4	Transmembrane protein 47 [OS=Homo sapiens]	3.955	7	3	1	Peak Found	Not Found	Peak Found	Not Found	Not Found	Peak Found	Not Found	Not Found	Not Found	Not Found	Peak Found	Peak Found	Not Found	Not Found	Peak Found	Not Found	Not Found	Peak Found	Peak Found	Not Found	Peak Found	Peak Found	Not Found	High	High	High	Met-loss [N-Term]
Q9BT67	NEDD4 family-interacting protein 1 [OS=Homo sapiens]	7.695	8	17	1	Not Found	Not Found	Not Found	Not Found	Not Found	Not Found	High	High	High	High	High	High	High	High	High	High	Peak Found	High	High	High	Not Found	Not Found	Not Found	High	High	High	Met-loss+Acetyl [N-Term]
Q9BY89-1	Uncharacterized protein KIAA1671 [OS=Homo sapiens]	2.073	1	1	1	Not Found	Not Found	Not Found	Not Found	Not Found	Not Found	Peak Found	Peak Found	Peak Found	Peak Found	Peak Found	Peak Found	Peak Found	Peak Found	Peak Found	High	Peak Found	Peak Found	Peak Found	Peak Found	Peak Found	Peak Found	Peak Found	Peak Found	Peak Found	Peak Found
Q9C0H2-1	Protein tweety homolog 3 [OS=Homo sapiens]	26.167	9	27	3	Peak Found	Peak Found	High	Not Found	Not Found	Not Found	High	High	High	High	High	High	High	High	High	High	High	High	High	High	Peak Found	Peak Found	Peak Found	High	High	High
Q9H9A6	Leucine-rich repeat-containing protein 40 [OS=Homo sapiens]	19.975	9	28	3	High	High	Peak Found	Peak Found	Peak Found	Peak Found	High	High	High	High	High	High	High	High	High	High	High	High	High	High	Peak Found	Peak Found	Peak Found	Peak Found	Peak Found	High
Q9NQ55-1	suppressor of SWI4 1 homolog [OS=Homo sapiens]	4.597	3	2	1	High	Peak Found	Peak Found	Not Found	Not Found	Not Found	High	Not Found	Not Found	Peak Found	Not Found	Not Found	Not Found	Not Found	Not Found	Not Found	Not Found	Not Found	Not Found	Not Found	Not Found	Not Found	Peak Found	Not Found	Not Found	Not Found
Q9NQA3	WAS protein family homolog 6 [OS=Homo sapiens]	9.274	4	6	1	High	High	High	Peak Found	High	Not Found	Not Found	Not Found	Not Found	Not Found	Not Found	Not Found	Not Found	Not Found	Peak Found	Peak Found	Peak Found	High	Peak Found	Peak Found	Not Found	Not Found	Not Found	Not Found	Not Found	Not Found
Q9NR30-1	Nucleolar RNA helicase 2 [OS=Homo sapiens]	170.466	45	274	26	High	High	High	High	High	High	High	High	High	High	High	High	High	High	High	High	High	High	High	High	High	High	High	High	High	High
Q9NRV9	Heme-binding protein 1 [OS=Homo sapiens]	157.407	77	372	11	High	High	High	High	High	High	High	High	High	High	High	High	High	High	High	High	High	High	High	High	High	High	High	High	High	High
Q9NRX5	Serine incorporator 1 [OS=Homo sapiens]	11.803	7	25	2	High	High	High	Peak Found	High	High	High	High	High	High	High	High	High	High	Peak Found	High	High	Peak Found	Peak Found	Peak Found	High	High	High	High	High	High
Q9NS25	Sperm protein associated with the nucleus on the X chromosome B1 [OS=Homo sapiens]	4.415	11	1	1	Not Found	Not Found	Not Found	Peak Found	High	Peak Found	Not Found	Peak Found	Not Found	Peak Found	Peak Found	Not Found	Not Found	Not Found	Not Found	Not Found	Not Found	Not Found	Not Found	Not Found	Not Found	Not Found	Not Found	Not Found	Not Found	Not Found
Q9NTJ3-1	Structural maintenance of chromosomes protein 4 [OS=Homo sapiens]	98.47	21	68	19	High	High	High	Peak Found	High	Peak Found	High	High	High	High	High	Peak Found	Peak Found	High	High	High	High	Peak Found	High	Peak Found	High	Peak Found	High	Peak Found	Peak Found	Peak Found
Q9NVM1	Protein eva-1 homolog B [OS=Homo sapiens]	14.627	35	4	2	Not Found	Not Found	Not Found	Not Found	Not Found	Not Found	High	High	High	Not Found	Peak Found	Not Found	Not Found	Not Found	Not Found	Not Found	Not Found	Not Found	Not Found	Not Found	Not Found	Not Found	Not Found	Not Found	Not Found	Peak Found
Q9NVS2	39S ribosomal protein S18a, mitochondrial [OS=Homo sapiens]	3.888	6	2	1	Not Found	Not Found	High	Peak Found	Peak Found	Peak Found	Not Found	Not Found	Not Found	Not Found	Not Found	Not Found	Peak Found	Peak Found	Not Found	Not Found	Not Found	Not Found	Not Found	Peak Found	Not Found	Not Found	Not Found	Not Found	Not Found	High
Q9NXG6	Transmembrane prolyl 4-hydroxylase [OS=Homo sapiens]	5.248	5	1	1	Not Found	Not Found	Not Found	Not Found	Not Found	Not Found	Peak Found	Peak Found	Not Found	Peak Found	Peak Found	Peak Found	Not Found	Peak Found	Not Found	Peak Found	Not Found	Peak Found	Peak Found	Peak Found	Not Found	Not Found	Not Found	Not Found	Not Found	High
Q9NYC9-1	Dynein heavy chain 9, axonemal [OS=Homo sapiens]	4.416	0	2	1	Not Found	Not Found	Not Found	High	Peak Found	Not Found	Not Found	Not Found	Not Found	Not Found	Not Found	Not Found	Not Found	Not Found	Not Found	Not Found	Not Found	Not Found	Not Found	Not Found	Not Found	Not Found	Not Found	Not Found	Not Found	Not Found
Q9NYP7-1	elongation of very long chain fatty acids protein 5 [OS=Homo sapiens]	12.839	4	18	1	Not Found	Not Found	Not Found	Not Found	Not Found	Not Found	High	High	High	High	High	High	High	High	High	High	High	Peak Found	Peak Found	Peak Found	Peak Found	Peak Found	Peak Found	Peak Found	High	High	Acetyl [N-Term]
Q9P003	Protein cornichon homolog 4 [OS=Homo sapiens]	14.778	14	15	1	Not Found	Not Found	Not Found	Not Found	Not Found	Not Found	High	High	High	Peak Found	High	Not Found	Not Found	High	Not Found	High	Not Found	Not Found	Peak Found	Not Found	Not Found	Peak Found	Peak Found	High	High	High
Q9P2X0-1	Dolichol-phosphate mannosyltransferase subunit 3 [OS=Homo sapiens]	3.815	11	4	1	Peak Found	Peak Found	Peak Found	Peak Found	Peak Found	Peak Found	High	High	Peak Found	Peak Found	Peak Found	Peak Found	Peak Found	Peak Found	Peak Found	Peak Found	Peak Found	Peak Found	Peak Found	Peak Found	Peak Found	Peak Found	Peak Found	Peak Found	High	High
Q9UGT4	Sushi domain-containing protein 2 [OS=Homo sapiens]	13.428	3	15	2	High	High	High	Peak Found	High	High	Peak Found	Peak Found	Peak Found	Peak Found	Peak Found	High	High	Peak Found	Peak Found	Peak Found	Peak Found	Peak Found	High	Peak Found	Peak Found	High	High	Peak Found	Peak Found	Peak Found
Q9UHB6-4	Isoform 4 of LIM domain and actin-binding protein 1 [OS=Homo sapiens]	253.681	48	583	0	Not Found	Not Found	Not Found	Not Found	Not Found	Not Found	Not Found	Not Found	Not Found	Not Found	Not Found	Not Found	Not Found	Not Found	Not Found	Not Found	Not Found	Not Found	Not Found	Not Found	Not Found	Not Found	Not Found	Not Found	Not Found	Not Found
Q9ULU8-1	Calcium-dependent secretion activator 1 [OS=Homo sapiens]	4.817	1	2	1	Not Found	Not Found	Not Found	Not Found	Not Found	Not Found	Peak Found	Not Found	Not Found	Not Found	Not Found	Not Found	Not Found	Not Found	Not Found	Not Found	Not Found	Not Found	Not Found	Not Found	Not Found	Not Found	Not Found	High	Peak Found	High
Q9Y2V2	Calcium-regulated heat-stable protein 1 [OS=Homo sapiens]	48.065	59	99	5	High	High	High	High	Peak Found	Peak Found	High	High	High	High	High	High	High	High	High	High	High	High	High	High	High	High	High	High	High	High	Met-loss+Acetyl [N-Term]
Q9Y6R1-1	Electrogenic sodium bicarbonate cotransporter 1 [OS=Homo sapiens]	7.057	2	1	1	Not Found	Not Found	Not Found	Not Found	Not Found	Not Found	Peak Found	Peak Found	Peak Found	Peak Found	High	Peak Found	Peak Found	Peak Found	Not Found	Not Found	Peak Found	Peak Found	Not Found	Peak Found	Peak Found	Peak Found	Peak Found	Peak Found	Peak Found	Peak Found
O43663-1	Protein regulator of cytokinesis 1 [OS=Homo sapiens]	2.213	1	2	1	Peak Found	Peak Found	Peak Found	Peak Found	High	Peak Found	Peak Found	Not Found	Peak Found	Peak Found	Peak Found	Peak Found	Peak Found	Peak Found	Peak Found	Peak Found	Not Found	Peak Found	Peak Found	Peak Found	Not Found	Peak Found	High	Not Found	Not Found	Not Found
O60602	toll-like receptor 5 [OS=Homo sapiens]	2.01	1	1	1	Not Found	Not Found	Not Found	High	Peak Found	Peak Found	Not Found	Not Found	Not Found	Not Found	Not Found	Not Found	Not Found	Not Found	Not Found	Not Found	Not Found	Not Found	Not Found	Not Found	Not Found	Not Found	Not Found	Not Found	Not Found	Not Found
O95972	Bone morphogenetic protein 15 [OS=Homo sapiens]	2.272	2	13	1	High	Peak Found	Peak Found	High	Peak Found	High	Peak Found	High	Peak Found	High	Peak Found	High	High	Peak Found	Peak Found	Peak Found	High	Peak Found	Peak Found	High	High	Peak Found	High	Peak Found	High	Peak Found
P21817	Ryanodine receptor 1 [OS=Homo sapiens]	1.934	0	2	1	Peak Found	Peak Found	Peak Found	Peak Found	Peak Found	Peak Found	Peak Found	High	Peak Found	Peak Found	Peak Found	Peak Found	Peak Found	Not Found	Peak Found	Peak Found	Peak Found	Peak Found	Peak Found	Peak Found	Peak Found	Peak Found	Peak Found	Peak Found	High	Peak Found
Q01780	exosome component 10 [OS=Homo sapiens]	2.051	1	1	1	High	Peak Found	Peak Found	Not Found	Not Found	Not Found	Not Found	Not Found	Not Found	Not Found	Not Found	Not Found	Not Found	Not Found	Not Found	Not Found	Not Found	Not Found	Not Found	Not Found	Not Found	Not Found	Not Found	Not Found	Not Found	Not Found
Q05BV3-5	Isoform 5 of Echinoderm microtubule-associated protein-like 5 [OS=Homo sapiens]	1.918	0	13	1	High	Peak Found	Peak Found	Peak Found	High	Peak Found	Peak Found	Peak Found	Peak Found	Peak Found	Peak Found	Peak Found	High	High	High	Peak Found	High	Peak Found	Peak Found	Peak Found	Peak Found	Peak Found	Peak Found	High	High	High
Q13613-1	Myotubularin-related protein 1 [OS=Homo sapiens]	2.031	1	2	1	Not Found	High	High	Not Found	Not Found	Not Found	Not Found	Not Found	Not Found	Not Found	Not Found	Not Found	Not Found	Not Found	Not Found	Not Found	Not Found	Not Found	Not Found	Not Found	Not Found	Not Found	Not Found	Not Found	Not Found	Not Found
Q14190-1	Single-minded homolog 2 [OS=Homo sapiens]	2.171	1	5	1	Peak Found	Peak Found	Peak Found	Peak Found	High	High	Peak Found	High	Peak Found	Peak Found	Peak Found	Peak Found	High	High	Peak Found	Peak Found	Peak Found	Peak Found	Peak Found	Peak Found	Peak Found	Peak Found	Peak Found	Peak Found	Peak Found	Peak Found
Q15468-1	SCL-interrupting locus protein [OS=Homo sapiens]	2.042	0	2	1	Peak Found	Peak Found	Peak Found	Peak Found	Peak Found	Peak Found	Peak Found	Peak Found	High	Peak Found	Peak Found	Peak Found	Peak Found	Peak Found	Peak Found	Peak Found	Peak Found	Peak Found	Peak Found	Peak Found	Peak Found	Peak Found	Peak Found	Peak Found	High	Peak Found
Q15628	Tumor necrosis factor receptor type 1-associated DEATH domain protein [OS=Homo sapiens]	2.114	3	2	1	High	High	Peak Found	Not Found	Not Found	Not Found	Not Found	Peak Found	Not Found	Not Found	Not Found	Not Found	Not Found	Not Found	Not Found	Not Found	Not Found	Not Found	Not Found	Not Found	Not Found	Not Found	Not Found	Not Found	Not Found	Not Found
Q16623	syntaxin-1A [OS=Homo sapiens]	2.037	3	3	1	Peak Found	Peak Found	Peak Found	High	High	Peak Found	Peak Found	Peak Found	High	Peak Found	Not Found	Peak Found	Peak Found	Peak Found	Peak Found	Peak Found	Peak Found	Not Found	Not Found	Not Found	Not Found	Peak Found	Peak Found	Peak Found	Peak Found	Peak Found
Q5VU65	nuclear pore membrane glycoprotein 210-like [OS=Homo sapiens]	2.003	0	2	1	Peak Found	High	Peak Found	Peak Found	High	Peak Found	Not Found	Not Found	Not Found	Not Found	Not Found	Not Found	Not Found	Not Found	Not Found	Not Found	Not Found	Not Found	Not Found	Not Found	Not Found	Not Found	Not Found	Not Found	Not Found	Not Found
Q68D10-1	Protein SPT2 homolog [OS=Homo sapiens]	2.022	1	2	1	Peak Found	Peak Found	Peak Found	Peak Found	Peak Found	High	High	Peak Found	Not Found	Not Found	Not Found	Not Found	Peak Found	Not Found	Peak Found	Not Found	Peak Found	Not Found	Not Found	Not Found	Not Found	Not Found	Peak Found	Not Found	Not Found	Not Found
Q86T82	ubiquitin carboxyl-terminal hydrolase 37 [OS=Homo sapiens]	2.298	1	1	1	Peak Found	Peak Found	Peak Found	Peak Found	Peak Found	Peak Found	Peak Found	Peak Found	Not Found	Peak Found	Not Found	Peak Found	Not Found	Not Found	Peak Found	Peak Found	Peak Found	Peak Found	Peak Found	Peak Found	Peak Found	Peak Found	Peak Found	Peak Found	High	Peak Found
Q8N7B6	PACRG-like protein [OS=Homo sapiens]	2.167	4	5	1	Peak Found	Peak Found	High	Peak Found	Peak Found	Peak Found	High	Not Found	Peak Found	Peak Found	High	High	Peak Found	Peak Found	Peak Found	Peak Found	Peak Found	Peak Found	Peak Found	High	Peak Found	Peak Found	Peak Found	Not Found	Not Found	Not Found
Q8NFZ5-1	TNFAIP3-interacting protein 2 [OS=Homo sapiens]	2.065	2	6	1	Peak Found	Peak Found	Peak Found	High	Peak Found	High	Peak Found	High	Peak Found	Peak Found	Peak Found	Peak Found	High	High	Peak Found	Peak Found	High	Peak Found	Peak Found	Peak Found	Peak Found	Peak Found	Peak Found	Peak Found	Peak Found	Peak Found
Q8WZ42	Titin [OS=Homo sapiens]	3.88	0	4	2	Peak Found	High	Peak Found	Peak Found	Peak Found	Peak Found	Peak Found	Peak Found	High	Peak Found	Peak Found	Peak Found	Peak Found	Peak Found	Peak Found	Peak Found	Peak Found	High	Peak Found	Peak Found	Peak Found	Peak Found	Peak Found	Peak Found	High	Peak Found	Acetyl [K9403]
Q969K7-1	Transmembrane protein 54 [OS=Homo sapiens]	2.156	4	2	1	Not Found	Not Found	Not Found	Peak Found	High	High	Not Found	Not Found	Not Found	Not Found	Not Found	Not Found	Not Found	Peak Found	Not Found	Not Found	Not Found	Not Found	Not Found	Not Found	Not Found	Not Found	Not Found	Not Found	Not Found	Not Found
Q96C01	Protein FAM136A [OS=Homo sapiens]	2.228	7	1	1	Peak Found	Not Found	Peak Found	Peak Found	Peak Found	High	Not Found	Not Found	Not Found	Not Found	Not Found	Not Found	Not Found	Peak Found	Peak Found	Not Found	Not Found	Peak Found	Peak Found	Peak Found	Peak Found	Not Found	Not Found	Not Found	Not Found	Not Found
Q96CJ1-1	ELL-associated factor 2 [OS=Homo sapiens]	2	3	2	1	Peak Found	Peak Found	High	Peak Found	Peak Found	Peak Found	Peak Found	Peak Found	Peak Found	Peak Found	Peak Found	Peak Found	Peak Found	Peak Found	Peak Found	Peak Found	Peak Found	Peak Found	Peak Found	Peak Found	Peak Found	Peak Found	Peak Found	High	Peak Found	Peak Found
Q96RD6-1	Isoform 1 of Pannexin-2 [OS=Homo sapiens]	2.191	1	2	1	Peak Found	High	Not Found	Not Found	Not Found	Not Found	High	Peak Found	Peak Found	Not Found	Peak Found	Not Found	Not Found	Not Found	Not Found	Not Found	Not Found	Not Found	Not Found	Not Found	Not Found	Not Found	Not Found	Peak Found	Peak Found	Not Found
Q96S55-1	ATPase WRNIP1 [OS=Homo sapiens]	2.001	1	4	1	High	High	Peak Found	Peak Found	Peak Found	Peak Found	Peak Found	Peak Found	Peak Found	Peak Found	Peak Found	Peak Found	Peak Found	Peak Found	Peak Found	High	Peak Found	Peak Found	Peak Found	High	Peak Found	Peak Found	Peak Found	Peak Found	Peak Found	Peak Found
Q9BPU6	Dihydropyrimidinase-related protein 5 [OS=Homo sapiens]	1.951	1	6	1	High	High	High	Peak Found	High	Peak Found	Peak Found	Peak Found	Peak Found	Peak Found	Peak Found	Peak Found	Peak Found	Peak Found	Peak Found	Peak Found	Peak Found	Peak Found	Peak Found	Peak Found	High	Peak Found	Peak Found	Peak Found	Peak Found	Peak Found
Q9H2F9	Coiled-coil domain-containing protein 68 [OS=Homo sapiens]	1.981	2	2	1	Peak Found	Peak Found	Peak Found	Peak Found	Peak Found	Peak Found	Peak Found	Peak Found	Not Found	Not Found	Not Found	Peak Found	Peak Found	Peak Found	Peak Found	High	High	Peak Found	Peak Found	Peak Found	Peak Found	Peak Found	Peak Found	Not Found	Not Found	Not Found
Q9NV35	Nucleotide triphosphate diphosphatase NUDT15 [OS=Homo sapiens]	2.314	7	1	1	Peak Found	Not Found	Peak Found	Peak Found	High	Peak Found	Not Found	Not Found	Peak Found	Peak Found	Peak Found	Not Found	Not Found	Peak Found	Not Found	Not Found	Not Found	Peak Found	Peak Found	Not Found	Peak Found	Peak Found	Not Found	Not Found	Not Found	Not Found
Q9UPU7-1	TBC1 domain family member 2B [OS=Homo sapiens]	1.921	2	1	1	Not Found	Not Found	Not Found	Not Found	Not Found	Not Found	Not Found	High	Peak Found	Peak Found	Peak Found	Not Found	Not Found	Not Found	Not Found	Not Found	Not Found	Not Found	Not Found	Not Found	Not Found	Not Found	Not Found	Peak Found	Not Found	Not Found
O00214-1	Galectin-8 [OS=Homo sapiens]	2.965	3	2	1	Peak Found	High	High	Not Found	Not Found	Not Found	Not Found	Not Found	Not Found	Not Found	Not Found	Not Found	Not Found	Not Found	Not Found	Not Found	Not Found	Not Found	Not Found	Not Found	Not Found	Not Found	Not Found	Peak Found	Peak Found	Not Found
O14686-1	Histone-lysine N-methyltransferase 2D [OS=Homo sapiens]	2.694	0	6	1	High	Peak Found	High	Peak Found	Peak Found	High	Peak Found	Peak Found	Peak Found	Peak Found	Peak Found	Peak Found	Peak Found	Peak Found	High	Peak Found	Peak Found	Peak Found	Peak Found	Peak Found	Peak Found	Peak Found	Peak Found	Peak Found	Peak Found	Peak Found
O15085-1	Rho guanine nucleotide exchange factor 11 [OS=Homo sapiens]	2.407	0	4	1	High	High	Peak Found	Peak Found	Peak Found	Peak Found	Peak Found	Peak Found	Peak Found	Peak Found	Peak Found	Peak Found	Peak Found	Peak Found	Peak Found	Peak Found	Peak Found	Peak Found	Peak Found	Peak Found	Peak Found	High	Peak Found	High	Peak Found	Peak Found
O60671-1	Cell cycle checkpoint protein RAD1 [OS=Homo sapiens]	3.126	9	1	1	Peak Found	Peak Found	Peak Found	Peak Found	Peak Found	Peak Found	Peak Found	Peak Found	Peak Found	Peak Found	High	Not Found	Not Found	Not Found	Peak Found	Not Found	Not Found	Not Found	Not Found	Peak Found	Not Found	Peak Found	Peak Found	Not Found	Not Found	Not Found	Met-loss [N-Term]
P01009-1	alpha-1-antitrypsin [OS=Homo sapiens]	3.568	2	3	1	Not Found	Not Found	Not Found	High	High	High	Not Found	Not Found	Not Found	Not Found	Not Found	Not Found	Not Found	Not Found	Not Found	Not Found	Not Found	Not Found	Not Found	Not Found	Not Found	Not Found	Not Found	Not Found	Not Found	Not Found
P52732	Kinesin-like protein KIF11 [OS=Homo sapiens]	3.532	1	4	1	Not Found	High	Peak Found	Not Found	Not Found	Not Found	Not Found	Not Found	High	High	High	Not Found	Not Found	Not Found	Not Found	Peak Found	Not Found	Not Found	Not Found	Not Found	Not Found	Not Found	Not Found	Not Found	Not Found	Not Found
Q13542	eukaryotic translation initiation factor 4E-binding protein 2 [OS=Homo sapiens]	3.789	13	1	1	Peak Found	Peak Found	Peak Found	Peak Found	Peak Found	High	Not Found	Peak Found	Peak Found	Peak Found	Peak Found	Peak Found	Peak Found	Not Found	Not Found	Not Found	Not Found	Peak Found	Not Found	Peak Found	Not Found	Not Found	Not Found	Not Found	Not Found	Not Found	Met-loss+Acetyl [N-Term]
Q15004-1	PCNA-associated factor [OS=Homo sapiens]	3.411	16	2	1	Peak Found	Peak Found	Peak Found	Not Found	Not Found	Not Found	Not Found	Not Found	High	Peak Found	High	Not Found	Not Found	Not Found	Not Found	Not Found	Not Found	Not Found	Not Found	Not Found	Not Found	Not Found	Not Found	Not Found	Not Found	Not Found
Q8IZH2-1	5'-3' exoribonuclease 1 [OS=Homo sapiens]	2.753	1	4	1	High	Peak Found	Peak Found	Not Found	Not Found	Not Found	Peak Found	Not Found	High	Not Found	Not Found	Not Found	Not Found	Not Found	Not Found	Peak Found	High	Peak Found	Peak Found	High	Peak Found	Not Found	Peak Found	Not Found	Not Found	Not Found
Q8N7Z5	Putative ankyrin repeat domain-containing protein 31 [OS=Homo sapiens]	2.556	0	14	1	High	Peak Found	High	Peak Found	High	High	Peak Found	High	Peak Found	High	Peak Found	High	High	High	Peak Found	Peak Found	Peak Found	Peak Found	Peak Found	Peak Found	Peak Found	Peak Found	High	Peak Found	Peak Found	Peak Found
Q8TBZ0-1	Coiled-coil domain-containing protein 110 [OS=Homo sapiens]	2.163	1	10	1	High	High	Peak Found	Peak Found	High	Peak Found	Peak Found	Peak Found	High	Peak Found	Peak Found	Peak Found	Peak Found	High	Peak Found	Peak Found	High	High	High	Peak Found	Peak Found	Peak Found	Peak Found	Peak Found	Peak Found	High
Q93063	exostosin-2 [OS=Homo sapiens]	3.255	4	1	1	Not Found	Not Found	Not Found	Not Found	Not Found	Not Found	Not Found	Not Found	Not Found	Not Found	Peak Found	Not Found	Not Found	Not Found	Not Found	Not Found	Not Found	Not Found	Not Found	Not Found	Not Found	Not Found	Not Found	High	Peak Found	Peak Found
Q96FS4	signal-induced proliferation-associated protein 1 [OS=Homo sapiens]	2.455	1	9	1	Peak Found	Peak Found	High	Peak Found	Peak Found	Peak Found	High	High	Peak Found	High	Peak Found	Peak Found	High	Peak Found	Peak Found	High	Peak Found	Peak Found	Peak Found	Peak Found	Peak Found	Peak Found	Peak Found	High	High	High
Q9BUD6	Spondin-2 [OS=Homo sapiens]	2.76	7	1	1	Not Found	Not Found	Not Found	Not Found	Not Found	Not Found	Not Found	Not Found	Peak Found	High	Peak Found	Not Found	Not Found	Not Found	Not Found	Not Found	Not Found	Not Found	Not Found	Not Found	Not Found	Not Found	Not Found	Peak Found	Peak Found	Peak Found
Q9H0H5	Rac GTPase-activating protein 1 [OS=Homo sapiens]	3.485	3	1	1	Not Found	Peak Found	Peak Found	Not Found	Not Found	Not Found	Not Found	Not Found	Peak Found	Peak Found	High	Not Found	Not Found	Not Found	Not Found	Not Found	Not Found	Not Found	Not Found	Not Found	Not Found	Not Found	Not Found	Not Found	Not Found	Not Found
Q9H3U5	major facilitator superfamily domain-containing protein 1 [OS=Homo sapiens]	2.883	3	11	1	High	High	Not Found	Not Found	Not Found	Not Found	Not Found	High	Peak Found	Not Found	Peak Found	High	Not Found	Not Found	Not Found	Not Found	Not Found	Not Found	Not Found	Not Found	Not Found	Not Found	Not Found	High	High	High
Q9NY61	Protein AATF [OS=Homo sapiens]	2.407	2	2	1	Not Found	Not Found	Not Found	Not Found	Not Found	Not Found	Not Found	Not Found	High	Not Found	High	Not Found	Not Found	Not Found	Not Found	Not Found	Not Found	Not Found	Not Found	Not Found	Not Found	Not Found	Not Found	Not Found	Not Found	Not Found
Q9NZM5	ribosome biogenesis protein NOP53 [OS=Homo sapiens]	3.344	3	1	1	Not Found	High	Not Found	Not Found	Not Found	Not Found	Not Found	Not Found	Not Found	Not Found	Not Found	Not Found	Not Found	Not Found	Not Found	Not Found	Not Found	Peak Found	Peak Found	Not Found	Not Found	Not Found	Not Found	Not Found	Not Found	Not Found
Q9UFD9	RIMS-binding protein 3A [OS=Homo sapiens]	2.414	0	2	1	High	Not Found	Not Found	High	Not Found	Not Found	Not Found	Not Found	Not Found	Not Found	Not Found	Not Found	Not Found	Not Found	Not Found	Not Found	Not Found	Not Found	Not Found	Not Found	Not Found	Not Found	Not Found	Not Found	Not Found	Not Found
Q9UMY1-1	Nucleolar protein 7 [OS=Homo sapiens]	3.531	4	5	1	High	High	High	High	Peak Found	Peak Found	Peak Found	Peak Found	Peak Found	Peak Found	Peak Found	Peak Found	Peak Found	High	Peak Found	Not Found	Peak Found	Not Found	Peak Found	Peak Found	Peak Found	Peak Found	Peak Found	Not Found	Peak Found	Not Found
Q9Y399	28S ribosomal protein S2, mitochondrial [OS=Homo sapiens]	3.425	4	3	1	Not Found	Not Found	Not Found	High	High	High	Not Found	Not Found	Not Found	Not Found	Not Found	Not Found	Not Found	Not Found	Not Found	Not Found	Not Found	Not Found	Not Found	Not Found	Not Found	Not Found	Not Found	Not Found	Not Found	Not Found
Q9Y5E7	Protocadherin beta-2 [OS=Homo sapiens]	2.435	1	10	1	High	High	High	Peak Found	High	High	Peak Found	High	Peak Found	Not Found	Not Found	Peak Found	Peak Found	High	Not Found	Peak Found	High	Peak Found	High	Peak Found	Peak Found	Peak Found	Not Found	Peak Found	High	Not Found
Q9Y6R7	IgGFc-binding protein [OS=Homo sapiens]	2.343	0	1	1	Peak Found	Peak Found	Peak Found	Peak Found	Peak Found	Peak Found	Peak Found	Peak Found	Peak Found	Peak Found	High	Peak Found	Peak Found	Peak Found	Peak Found	Peak Found	Peak Found	Peak Found	Peak Found	Peak Found	Peak Found	Peak Found	Peak Found	Peak Found	Peak Found	Peak Found	Acetyl [K5287]
B9A064-1	Immunoglobulin lambda-like polypeptide 5 [OS=Homo sapiens]	8.362	9	1	1	Not Found	Not Found	Not Found	Not Found	Not Found	Not Found	Not Found	Not Found	Not Found	Not Found	Not Found	High	Not Found	Not Found	Not Found	Not Found	Not Found	Not Found	Not Found	Not Found	Not Found	Not Found	Not Found	Not Found	Not Found	Not Found
O00592	Podocalyxin [OS=Homo sapiens]	29.394	8	14	2	Not Found	Not Found	Not Found	Not Found	Not Found	Not Found	Not Found	Not Found	Not Found	Not Found	Not Found	High	High	High	High	High	High	Peak Found	Peak Found	High	High	Peak Found	High	Not Found	Not Found	Not Found
O14558	Heat shock protein beta-6 [OS=Homo sapiens]	200.452	94	540	10	High	High	High	High	High	High	High	High	High	High	High	High	High	High	High	High	High	High	High	High	High	High	High	High	High	High	Acetyl [N-Term]
O15231-3	Isoform 3 of Zinc finger protein 185 [OS=Homo sapiens]	131.989	38	88	1	Not Found	Not Found	Not Found	Not Found	Not Found	Not Found	Not Found	Not Found	Not Found	Not Found	Not Found	Not Found	Not Found	Not Found	Peak Found	High	High	Not Found	Not Found	Not Found	Not Found	Not Found	Not Found	Not Found	Not Found	Not Found	Met-loss+Acetyl [N-Term]
O15231-5	Isoform 5 of Zinc finger protein 185 [OS=Homo sapiens]	110.426	43	66	1	Not Found	Not Found	Not Found	Not Found	Not Found	Not Found	Not Found	Not Found	Not Found	Not Found	Not Found	Not Found	Not Found	Not Found	High	Peak Found	Peak Found	Not Found	Not Found	Not Found	Not Found	Not Found	Not Found	Not Found	Not Found	Not Found
O60218	Aldo-keto reductase family 1 member B10 [OS=Homo sapiens]	3.975	3	2	1	Not Found	Not Found	Not Found	Not Found	Not Found	Not Found	Not Found	Not Found	Not Found	Not Found	Not Found	Not Found	Not Found	Not Found	Not Found	Not Found	Not Found	Not Found	Not Found	Not Found	Peak Found	High	High	Not Found	Not Found	Not Found
O60704	Protein-tyrosine sulfotransferase 2 [OS=Homo sapiens]	13.779	10	5	2	Not Found	Not Found	Not Found	Not Found	Not Found	Not Found	Not Found	Not Found	Not Found	Not Found	Not Found	Not Found	Not Found	Not Found	Not Found	Not Found	Not Found	Not Found	Not Found	Not Found	Not Found	Peak Found	Peak Found	High	High	High
O60711-1	Leupaxin [OS=Homo sapiens]	79.887	36	65	6	Not Found	High	Peak Found	Not Found	Not Found	Not Found	Peak Found	Peak Found	High	High	High	High	High	High	High	High	High	High	High	High	High	High	High	High	High	High	Acetyl [N-Term]
O75391	Sperm-associated antigen 7 [OS=Homo sapiens]	26.159	33	30	4	Peak Found	High	High	Not Found	Not Found	Not Found	High	High	High	High	High	High	High	High	High	High	High	High	High	High	High	High	High	High	Not Found	High	Met-loss+Acetyl [N-Term]
O94766	Galactosylgalactosylxylosylprotein 3-beta-glucuronosyltransferase 3 [OS=Homo sapiens]	13.708	11	6	2	Peak Found	Peak Found	Peak Found	Peak Found	Peak Found	Peak Found	Peak Found	Peak Found	Peak Found	Peak Found	Peak Found	Peak Found	Peak Found	Peak Found	Peak Found	Peak Found	Peak Found	Peak Found	Peak Found	Peak Found	Peak Found	Peak Found	Peak Found	High	High	High
O95319-1	CUGBP Elav-like family member 2 [OS=Homo sapiens]	13.262	8	20	2	Not Found	Not Found	Not Found	Not Found	Not Found	Not Found	Not Found	Not Found	Not Found	Not Found	Not Found	High	High	High	Peak Found	Peak Found	Peak Found	High	Peak Found	High	Not Found	Not Found	Not Found	Peak Found	Peak Found	Peak Found
O95359	Transforming acidic coiled-coil-containing protein 2 [OS=Homo sapiens]	9.536	1	3	1	Not Found	Not Found	Not Found	Not Found	Not Found	Not Found	Not Found	Not Found	Not Found	Not Found	Not Found	Not Found	Not Found	Not Found	Not Found	Not Found	Not Found	High	High	Not Found	Not Found	Not Found	Not Found	Not Found	Not Found	Not Found
O95490-1	Adhesion G protein-coupled receptor L2 [OS=Homo sapiens]	27.184	7	10	6	Peak Found	Peak Found	Peak Found	Peak Found	Not Found	Not Found	Peak Found	Not Found	Peak Found	Peak Found	Peak Found	High	High	High	Not Found	Not Found	Peak Found	Not Found	Peak Found	Peak Found	Not Found	Peak Found	Not Found	Not Found	Not Found	Not Found
P00491	purine nucleoside phosphorylase [OS=Homo sapiens]	254.558	86	591	21	High	High	High	High	High	High	High	High	High	High	High	High	High	High	High	High	High	High	High	High	High	High	High	High	High	High	Acetyl [N-Term]
P01024	Complement C3 [OS=Homo sapiens]	58.275	5	33	5	Not Found	Not Found	Not Found	Not Found	Not Found	Not Found	Not Found	Not Found	Not Found	Not Found	Not Found	Not Found	Peak Found	Peak Found	Not Found	Not Found	Peak Found	Not Found	Not Found	Not Found	Not Found	Not Found	Not Found	High	High	High
P02458-2	Collagen alpha-1(II) chain [OS=Homo sapiens]	36.702	7	59	3	Not Found	Not Found	Not Found	Not Found	Not Found	Not Found	Not Found	Not Found	Not Found	Not Found	Not Found	Peak Found	High	Peak Found	Peak Found	Peak Found	Not Found	Not Found	Not Found	Not Found	Not Found	Not Found	Not Found	High	High	High
P02511	Alpha-crystallin B chain [OS=Homo sapiens]	127.316	85	291	13	High	High	High	High	High	High	Peak Found	Peak Found	Peak Found	Peak Found	Peak Found	High	High	High	High	High	High	High	High	High	High	High	High	High	High	High	Acetyl [N-Term]
P02751	fibronectin [OS=Homo sapiens]	1204.96	60	2236	90	High	High	High	High	High	High	High	High	High	High	High	High	High	High	High	High	High	High	High	High	High	High	High	High	High	High	Carbamyl [K987]
P04066	tissue alpha-L-fucosidase [OS=Homo sapiens]	6.278	6	3	2	Not Found	Not Found	Not Found	Not Found	Not Found	Not Found	Not Found	Not Found	Not Found	Not Found	Not Found	Not Found	Not Found	Peak Found	High	Peak Found	High	Not Found	Not Found	Peak Found	Not Found	Peak Found	Peak Found	Not Found	Not Found	Peak Found
P04222	HLA class I histocompatibility antigen, Cw-3 alpha chain [OS=Homo sapiens]	54.973	39	68	2	Not Found	Not Found	Not Found	Not Found	Not Found	Not Found	Not Found	Peak Found	Not Found	Not Found	Not Found	Not Found	Peak Found	Not Found	High	High	High	Peak Found	Peak Found	Peak Found	Not Found	Not Found	Not Found	Not Found	Not Found	Not Found
P04271	Protein S100-B [OS=Homo sapiens]	7.762	16	4	1	Not Found	Not Found	Not Found	Not Found	Not Found	Not Found	Not Found	Not Found	Not Found	Not Found	Not Found	Not Found	Not Found	Not Found	High	High	High	Not Found	Not Found	Not Found	Not Found	Not Found	Not Found	Not Found	Not Found	Not Found
P05120	Plasminogen activator inhibitor 2 [OS=Homo sapiens]	196.926	65	152	19	Not Found	Not Found	Not Found	Not Found	Not Found	Not Found	Peak Found	High	Peak Found	Peak Found	Peak Found	High	High	High	High	High	High	High	High	High	High	High	High	Peak Found	Peak Found	Peak Found	Acetyl [N-Term]
P05534	HLA class I histocompatibility antigen, A-24 alpha chain [OS=Homo sapiens]	167.028	57	265	1	Not Found	Not Found	Not Found	Not Found	Not Found	Not Found	Not Found	Not Found	Not Found	Not Found	Not Found	Not Found	Not Found	Not Found	Not Found	Not Found	Not Found	High	High	High	Not Found	Not Found	Not Found	Not Found	Not Found	Not Found
P07093-3	Isoform 3 of Glia-derived nexin [OS=Homo sapiens]	45.334	29	69	9	High	High	High	Peak Found	Peak Found	Not Found	High	High	Peak Found	Peak Found	Peak Found	High	High	High	High	High	High	High	High	High	High	High	High	High	High	High
P09455-1	Retinol-binding protein 1 [OS=Homo sapiens]	12.577	21	4	2	Not Found	Not Found	Not Found	Not Found	Not Found	Not Found	Not Found	Not Found	Not Found	Not Found	Not Found	Not Found	Not Found	Not Found	Peak Found	Peak Found	Peak Found	High	High	High	Not Found	Not Found	Not Found	Not Found	Not Found	Not Found
P0DJD0	RANBP2-like and GRIP domain-containing protein 1 [OS=Homo sapiens]	19.955	3	20	1	Not Found	Not Found	High	Not Found	Not Found	Not Found	Not Found	Not Found	Not Found	Not Found	Not Found	Peak Found	High	Not Found	Not Found	Not Found	Not Found	Not Found	Not Found	Not Found	Not Found	Not Found	Not Found	Not Found	Not Found	Not Found
P10909-1	Clusterin [OS=Homo sapiens]	22.077	12	10	3	Not Found	Not Found	Not Found	Not Found	Not Found	Not Found	Peak Found	Not Found	Not Found	Not Found	Not Found	Peak Found	Not Found	Peak Found	High	High	High	High	High	High	Not Found	Peak Found	Not Found	Not Found	Not Found	Not Found
P12532	Creatine kinase U-type, mitochondrial [OS=Homo sapiens]	11.538	11	6	2	Not Found	Not Found	Not Found	Not Found	Not Found	Not Found	Not Found	Not Found	Not Found	Not Found	Not Found	High	Not Found	Not Found	High	Not Found	Not Found	Peak Found	Not Found	Not Found	High	Not Found	Not Found	Not Found	Not Found	Not Found
P14621	Acylphosphatase-2 [OS=Homo sapiens]	3.89	18	5	1	Not Found	Not Found	Not Found	Not Found	Not Found	Not Found	Not Found	Not Found	Not Found	Not Found	Not Found	High	High	Not Found	Not Found	Not Found	Not Found	Not Found	Not Found	Not Found	Not Found	Not Found	Not Found	High	High	High
P14649	Myosin light chain 6B [OS=Homo sapiens]	47.166	25	279	1	Not Found	Not Found	Not Found	Not Found	Not Found	Not Found	Not Found	Not Found	Not Found	Not Found	Not Found	Not Found	Not Found	Not Found	Not Found	Not Found	Not Found	Not Found	Not Found	Not Found	Not Found	Not Found	High	Not Found	Not Found	Not Found
P15144	aminopeptidase N [OS=Homo sapiens]	601.754	52	1018	45	High	High	High	High	High	High	High	High	High	High	High	High	High	High	High	High	High	High	High	High	High	High	High	High	High	High	Acetyl [K152; K856]; Carbamyl [K205; K724]
P16188	HLA class I histocompatibility antigen, A-30 alpha chain [OS=Homo sapiens]	166.588	56	276	1	Not Found	Not Found	Not Found	Not Found	Not Found	Not Found	Not Found	Not Found	Not Found	Not Found	Not Found	Not Found	Not Found	Not Found	Peak Found	High	Peak Found	Not Found	Not Found	Not Found	Not Found	Not Found	Not Found	Not Found	Not Found	Not Found
P17677-1	Neuromodulin [OS=Homo sapiens]	135.518	76	80	14	Not Found	Not Found	Not Found	Not Found	Not Found	Not Found	Peak Found	Not Found	Not Found	Not Found	Not Found	High	High	High	Peak Found	Peak Found	High	High	High	High	Not Found	Not Found	Not Found	Not Found	Not Found	Not Found
P17693	HLA class I histocompatibility antigen, alpha chain G [OS=Homo sapiens]	12.043	11	19	1	Peak Found	Peak Found	High	Not Found	Not Found	Not Found	Peak Found	High	Peak Found	Peak Found	High	High	Peak Found	Peak Found	Peak Found	Peak Found	High	High	Peak Found	High	Peak Found	Peak Found	Peak Found	Peak Found	High	Peak Found
P19022	Cadherin-2 [OS=Homo sapiens]	18.597	5	15	3	Peak Found	Peak Found	High	Peak Found	Peak Found	High	Peak Found	Peak Found	Peak Found	Peak Found	High	Peak Found	Peak Found	Peak Found	Peak Found	High	High	High	Peak Found	Peak Found	High	Peak Found	High	High	High	High
P20848	Putative alpha-1-antitrypsin-related protein [OS=Homo sapiens]	3.847	5	5	1	Peak Found	Peak Found	Peak Found	Not Found	Not Found	Peak Found	Peak Found	Peak Found	Peak Found	High	Peak Found	Peak Found	Peak Found	Peak Found	Peak Found	High	Peak Found	High	Peak Found	Peak Found	Peak Found	Peak Found	Peak Found	High	Peak Found	Peak Found	Carbamyl [K161; K162]
P21810	biglycan [OS=Homo sapiens]	15.796	19	11	4	Not Found	Not Found	Not Found	Not Found	Not Found	Not Found	Not Found	Not Found	Not Found	Not Found	Not Found	High	High	High	High	High	High	Not Found	Peak Found	Peak Found	Peak Found	Peak Found	Peak Found	Not Found	High	Not Found
P21980	Protein-glutamine gamma-glutamyltransferase 2 [OS=Homo sapiens]	616.44	64	1054	38	High	High	High	High	High	High	High	High	High	High	High	High	High	High	High	High	High	High	High	High	High	High	High	High	High	High	Met-loss+Acetyl [N-Term]
P24666-2	Isoform 2 of Low molecular weight phosphotyrosine protein phosphatase [OS=Homo sapiens]	82.286	59	194	1	High	Peak Found	High	Peak Found	High	High	Not Found	Not Found	Peak Found	Peak Found	Peak Found	Not Found	Not Found	Not Found	High	High	Not Found	Peak Found	Not Found	Not Found	High	High	High	Peak Found	Peak Found	Peak Found
P26006	Integrin alpha-3 [OS=Homo sapiens]	195.809	32	238	25	Peak Found	Peak Found	Peak Found	High	Peak Found	Peak Found	High	High	High	High	High	High	High	High	High	High	High	High	High	High	High	High	High	High	High	High	Acetyl [K796]
P29279-1	Connective tissue growth factor [OS=Homo sapiens]	36.426	29	32	7	Not Found	Peak Found	Not Found	Peak Found	Peak Found	Peak Found	Peak Found	Peak Found	Peak Found	Peak Found	Peak Found	High	High	High	High	Peak Found	High	Peak Found	Peak Found	Peak Found	High	High	High	High	Peak Found	Peak Found
P30260	cell division cycle protein 27 homolog [OS=Homo sapiens]	3.927	4	3	1	Not Found	Not Found	Not Found	Not Found	Not Found	Not Found	Not Found	Not Found	Not Found	Not Found	Not Found	Not Found	Not Found	Not Found	Not Found	Not Found	Not Found	Not Found	Not Found	Not Found	High	High	High	Not Found	Not Found	Not Found
P30838	Aldehyde dehydrogenase, dimeric NADP-preferring [OS=Homo sapiens]	8.894	5	5	2	Not Found	Not Found	Not Found	Not Found	Not Found	Not Found	Not Found	Not Found	Not Found	Not Found	Not Found	Not Found	Not Found	Not Found	High	High	High	Not Found	Not Found	Not Found	Not Found	Not Found	Not Found	Not Found	Not Found	Not Found
P32856	Syntaxin-2 [OS=Homo sapiens]	10.138	11	3	1	Not Found	Not Found	Not Found	Not Found	Not Found	Not Found	Not Found	Not Found	Not Found	Not Found	Not Found	High	Not Found	High	Not Found	Peak Found	High	Not Found	Not Found	Peak Found	Not Found	Not Found	Not Found	Not Found	Not Found	Not Found
P35475	alpha-L-iduronidase [OS=Homo sapiens]	18.419	10	9	4	Not Found	Not Found	Not Found	Not Found	Not Found	Not Found	Not Found	Not Found	Not Found	Not Found	Not Found	Not Found	Peak Found	Not Found	Peak Found	High	Peak Found	Peak Found	Peak Found	Peak Found	Peak Found	Peak Found	Peak Found	High	High	High
P37059	Estradiol 17-beta-dehydrogenase 2 [OS=Homo sapiens]	37.04	27	19	6	Not Found	Not Found	Not Found	Not Found	Not Found	Not Found	High	High	Not Found	Not Found	Not Found	Not Found	Not Found	Not Found	Not Found	Not Found	Not Found	Not Found	Not Found	Not Found	High	High	High	Not Found	Not Found	Not Found
P37235	Hippocalcin-like protein 1 [OS=Homo sapiens]	55.389	55	38	9	Peak Found	Peak Found	Peak Found	Peak Found	Peak Found	Not Found	Peak Found	Peak Found	Peak Found	Peak Found	Peak Found	Peak Found	Peak Found	Peak Found	High	High	High	High	Peak Found	Peak Found	High	High	Peak Found	Peak Found	Peak Found	Peak Found
P37268	squalene synthase [OS=Homo sapiens]	10.048	8	3	2	Not Found	Not Found	Not Found	Not Found	Not Found	Not Found	Not Found	Not Found	Not Found	Not Found	Not Found	High	Peak Found	High	Peak Found	Not Found	Not Found	Not Found	Not Found	Not Found	Not Found	Not Found	Not Found	Not Found	High	Not Found
P37840-1	Alpha-synuclein [OS=Homo sapiens]	13.505	25	8	2	Not Found	Not Found	Not Found	Not Found	Not Found	Not Found	Not Found	Not Found	Not Found	Peak Found	Peak Found	Not Found	Not Found	Not Found	High	High	Peak Found	Peak Found	Not Found	Peak Found	Not Found	Not Found	Not Found	High	High	High
P47712	Cytosolic phospholipase A2 [OS=Homo sapiens]	85.41	28	54	12	Not Found	Not Found	Peak Found	Not Found	Not Found	Not Found	Not Found	Peak Found	Peak Found	High	Peak Found	High	High	High	High	High	High	High	High	High	High	High	High	High	Not Found	Peak Found
P51687	Sulfite oxidase, mitochondrial [OS=Homo sapiens]	11.759	6	3	1	Not Found	Not Found	Not Found	Not Found	Not Found	Not Found	Not Found	Not Found	Not Found	Not Found	Not Found	Not Found	Not Found	Not Found	Not Found	Not Found	Not Found	High	High	Peak Found	Not Found	Peak Found	Not Found	Not Found	Not Found	Not Found
P52943	Cysteine-rich protein 2 [OS=Homo sapiens]	80.276	32	90	3	Peak Found	High	High	Not Found	Not Found	Not Found	High	High	High	High	High	High	High	High	High	High	High	High	High	High	High	High	High	High	High	High
P54821	Paired mesoderm homeobox protein 1 [OS=Homo sapiens]	11.62	17	6	2	Not Found	Not Found	Not Found	Not Found	Not Found	Not Found	Not Found	Not Found	Not Found	Not Found	Not Found	Not Found	Peak Found	Peak Found	High	High	High	High	High	Peak Found	Not Found	Peak Found	Not Found	Not Found	Not Found	Not Found	Met-loss+Acetyl [N-Term]
P54868-1	Hydroxymethylglutaryl-CoA synthase, mitochondrial [OS=Homo sapiens]	9.772	6	9	1	Not Found	Not Found	Not Found	Not Found	Not Found	Not Found	Not Found	Not Found	Not Found	Not Found	Not Found	High	Not Found	Not Found	Not Found	Not Found	Not Found	Not Found	Not Found	Not Found	Not Found	Not Found	Not Found	Not Found	Not Found	Not Found
P63267-1	actin, gamma-enteric smooth muscle [OS=Homo sapiens]	1152.89	95	12922	2	Not Found	Not Found	Not Found	Not Found	Not Found	Not Found	Not Found	Not Found	Not Found	Not Found	Not Found	Not Found	Not Found	Not Found	Not Found	Not Found	Not Found	Not Found	Not Found	Not Found	High	High	High	High	High	High	Carbamyl [K51; K62; K69; K192; K316; K327; K329]; Acetyl [K51; K69]; Met-loss+Acetyl [N-Term]
P67775	Serine/threonine-protein phosphatase 2A catalytic subunit alpha isoform [OS=Homo sapiens]	211.183	75	408	1	Not Found	Not Found	Not Found	Not Found	Not Found	Not Found	Not Found	Not Found	Not Found	Not Found	Not Found	Not Found	Not Found	Peak Found	Not Found	Not Found	Not Found	Peak Found	Peak Found	High	High	Peak Found	High	Not Found	Not Found	High
Q00169	Phosphatidylinositol transfer protein alpha isoform [OS=Homo sapiens]	7.883	9	5	2	Peak Found	Peak Found	Peak Found	Not Found	Not Found	Not Found	Peak Found	Peak Found	Peak Found	Peak Found	Peak Found	Peak Found	Peak Found	Peak Found	Not Found	Peak Found	High	Not Found	High	Peak Found	Peak Found	Peak Found	Peak Found	High	High	High
Q02952-1	A-kinase anchor protein 12 [OS=Homo sapiens]	929.92	62	971	70	High	High	High	High	High	High	High	High	High	High	High	High	High	High	High	High	High	High	High	High	High	High	High	High	High	High
Q03154-1	Aminoacylase-1 [OS=Homo sapiens]	23.141	24	26	7	Peak Found	Peak Found	Peak Found	Peak Found	High	Peak Found	Peak Found	Peak Found	Peak Found	High	Peak Found	High	High	High	High	High	High	High	High	Peak Found	High	Peak Found	High	Peak Found	Peak Found	Peak Found
Q12884-1	prolyl endopeptidase FAP [OS=Homo sapiens]	90.698	30	129	17	Peak Found	Peak Found	Peak Found	Peak Found	Peak Found	High	High	Peak Found	High	High	Peak Found	High	High	High	High	High	High	High	High	High	Peak Found	High	High	High	High	High
Q12955	Ankyrin-3 [OS=Homo sapiens]	58.605	3	23	9	Not Found	Not Found	Not Found	Not Found	Not Found	Not Found	Not Found	Not Found	Not Found	Not Found	Not Found	High	High	High	Peak Found	Not Found	Not Found	Not Found	Not Found	Not Found	Not Found	Not Found	Not Found	Not Found	Not Found	Not Found
Q13683-3	Isoform Alpha-7X1B of Integrin alpha-7 [OS=Homo sapiens]	17.516	6	7	4	Not Found	Not Found	Not Found	Not Found	Not Found	Not Found	Not Found	Peak Found	Not Found	Not Found	Not Found	High	High	High	Peak Found	Peak Found	Peak Found	Peak Found	Peak Found	Peak Found	Not Found	Not Found	Not Found	Not Found	Not Found	Not Found
Q13884	Beta-1-syntrophin [OS=Homo sapiens]	8.279	8	16	2	Not Found	Not Found	Not Found	Not Found	Not Found	Not Found	High	Peak Found	Peak Found	Peak Found	Peak Found	High	High	High	High	High	High	Not Found	Not Found	Not Found	High	High	High	Not Found	Not Found	Not Found	Met-loss+Acetyl [N-Term]
Q14123-1	calcium/calmodulin-dependent 3',5'-cyclic nucleotide phosphodiesterase 1C [OS=Homo sapiens]	7.479	4	2	2	Not Found	Not Found	Not Found	Not Found	Not Found	Not Found	Not Found	Not Found	Not Found	Not Found	Not Found	Peak Found	High	High	Peak Found	Peak Found	Peak Found	Not Found	Not Found	Not Found	Not Found	Not Found	Not Found	Not Found	Not Found	Not Found
Q14126	Desmoglein-2 [OS=Homo sapiens]	28.447	7	9	3	Not Found	Not Found	Not Found	Not Found	Not Found	Not Found	Not Found	Not Found	Not Found	Not Found	Not Found	Not Found	Not Found	Not Found	Not Found	Not Found	Not Found	High	High	High	Not Found	Not Found	Peak Found	Not Found	Not Found	Not Found
Q14392	Leucine-rich repeat-containing protein 32 [OS=Homo sapiens]	8.549	8	2	2	Not Found	Not Found	Not Found	Not Found	Not Found	Not Found	Not Found	Not Found	Not Found	Not Found	Not Found	Peak Found	Peak Found	High	Not Found	Not Found	Not Found	Not Found	Not Found	Not Found	Not Found	Not Found	Not Found	Not Found	Not Found	Not Found
Q14956	Transmembrane glycoprotein NMB [OS=Homo sapiens]	25.858	5	48	2	Peak Found	Peak Found	Peak Found	Not Found	Not Found	Not Found	High	High	High	High	High	Peak Found	Peak Found	Peak Found	High	High	High	High	High	High	Peak Found	High	High	High	High	High
Q15124-1	phosphoglucomutase-like protein 5 [OS=Homo sapiens]	3.927	3	2	1	Not Found	Not Found	Not Found	Not Found	Not Found	Not Found	Not Found	Not Found	Not Found	Not Found	Not Found	Peak Found	High	High	Not Found	Not Found	Peak Found	Not Found	Not Found	Peak Found	Not Found	Not Found	Not Found	Not Found	Not Found	Not Found
Q15493-1	Regucalcin [OS=Homo sapiens]	5.6	6	1	1	Not Found	Not Found	Not Found	Not Found	Not Found	Not Found	Not Found	Not Found	Not Found	Not Found	Not Found	Not Found	Peak Found	Peak Found	Not Found	Peak Found	Peak Found	Peak Found	Not Found	Not Found	Peak Found	Peak Found	Peak Found	High	Peak Found	Peak Found
Q16563	Synaptophysin-like protein 1 [OS=Homo sapiens]	5.906	14	26	2	Peak Found	High	High	Not Found	Not Found	Not Found	High	High	High	High	Peak Found	High	Not Found	High	High	High	High	High	High	Peak Found	High	High	High	Not Found	High	High
Q16647	prostacyclin synthase [OS=Homo sapiens]	20.538	13	14	4	Not Found	Not Found	Not Found	Not Found	Not Found	Not Found	Not Found	Not Found	Not Found	Peak Found	Peak Found	Peak Found	Peak Found	Peak Found	Not Found	Not Found	Not Found	High	High	High	Not Found	Peak Found	Peak Found	High	High	High
Q53SF7-1	Cordon-bleu protein-like 1 [OS=Homo sapiens]	30.334	4	8	3	Not Found	Not Found	Not Found	Not Found	Not Found	Not Found	Peak Found	Peak Found	Not Found	Not Found	Not Found	High	High	High	Not Found	Not Found	Peak Found	Not Found	Peak Found	Not Found	Not Found	Not Found	Not Found	Not Found	Not Found	Not Found
Q56VL3	OCIA domain-containing protein 2 [OS=Homo sapiens]	8.259	20	4	3	Not Found	Not Found	Peak Found	Not Found	Not Found	Not Found	Not Found	Not Found	Not Found	Not Found	Not Found	Peak Found	Peak Found	Not Found	High	High	High	Peak Found	Not Found	Not Found	Not Found	Not Found	Not Found	Not Found	Not Found	Not Found
Q5JTV8-3	Isoform 3 of Torsin-1A-interacting protein 1 [OS=Homo sapiens]	116.733	40	209	1	Not Found	Not Found	Not Found	Not Found	Not Found	Not Found	Not Found	Not Found	Not Found	Not Found	Not Found	Not Found	Not Found	Not Found	High	High	High	Not Found	Not Found	Not Found	High	Peak Found	High	Not Found	Not Found	Not Found
Q5SW79-3	Isoform 3 of Centrosomal protein of 170 kDa [OS=Homo sapiens]	363.548	44	469	1	Not Found	Not Found	Not Found	Not Found	Not Found	Not Found	Not Found	Not Found	Not Found	Not Found	Not Found	Not Found	Not Found	Not Found	Not Found	Not Found	Not Found	Not Found	High	High	Not Found	Not Found	Not Found	Not Found	Not Found	Not Found	Met-loss+Acetyl [N-Term]
Q6ZUT6-1	Uncharacterized protein C15orf52 [OS=Homo sapiens]	15.388	7	5	2	Not Found	Not Found	Not Found	Not Found	Not Found	Not Found	Peak Found	Not Found	Not Found	Not Found	Not Found	Not Found	Not Found	Peak Found	High	High	High	Peak Found	Not Found	Not Found	Not Found	Not Found	Not Found	Not Found	Not Found	Not Found
Q76M96-1	Coiled-coil domain-containing protein 80 [OS=Homo sapiens]	17.876	3	4	1	Not Found	Not Found	Not Found	Not Found	Not Found	Not Found	Not Found	Not Found	Not Found	Not Found	Not Found	High	High	High	Not Found	Not Found	Not Found	Not Found	Not Found	Not Found	Not Found	Not Found	Not Found	Not Found	Not Found	Not Found
Q7L5N7	Lysophosphatidylcholine acyltransferase 2 [OS=Homo sapiens]	62.252	29	52	9	Not Found	Not Found	Not Found	Peak Found	Not Found	Peak Found	Peak Found	Peak Found	Peak Found	Peak Found	Peak Found	High	High	High	High	High	High	Peak Found	Peak Found	Peak Found	Peak Found	Peak Found	Peak Found	High	High	High
Q7Z5R6	Amyloid beta A4 precursor protein-binding family B member 1-interacting protein [OS=Homo sapiens]	30.997	11	14	3	Not Found	Not Found	Not Found	Not Found	Not Found	Not Found	Not Found	Not Found	Not Found	Not Found	Peak Found	Not Found	Not Found	Peak Found	High	High	High	Not Found	Not Found	Peak Found	Not Found	Not Found	Peak Found	Not Found	Not Found	Not Found
Q86VY9	Transmembrane protein 200A [OS=Homo sapiens]	4.683	6	2	2	Not Found	Not Found	Not Found	Not Found	Not Found	Not Found	Not Found	Not Found	Not Found	Not Found	Not Found	High	Peak Found	Peak Found	Not Found	Peak Found	Not Found	Peak Found	Peak Found	Not Found	Peak Found	Not Found	Not Found	Peak Found	Peak Found	Peak Found
Q86W26	NACHT, LRR and PYD domains-containing protein 10 [OS=Homo sapiens]	10.483	5	4	2	Not Found	Not Found	Not Found	Not Found	Not Found	Not Found	Not Found	Not Found	Not Found	Not Found	Not Found	High	High	High	Peak Found	Not Found	Not Found	Not Found	Not Found	Not Found	Peak Found	Peak Found	Not Found	High	Peak Found	Peak Found
Q86WG3-1	Caytaxin [OS=Homo sapiens]	4.538	3	1	1	Not Found	Not Found	Not Found	Not Found	Not Found	Not Found	Not Found	Not Found	Not Found	Not Found	Not Found	Peak Found	Peak Found	Not Found	High	Peak Found	Peak Found	Peak Found	Peak Found	Not Found	Not Found	Not Found	Not Found	Peak Found	Peak Found	Peak Found
Q8N0Y7	Probable phosphoglycerate mutase 4 [OS=Homo sapiens]	207.701	38	622	1	Not Found	Not Found	Not Found	Not Found	Not Found	Not Found	Not Found	Not Found	Not Found	Not Found	Not Found	Not Found	Peak Found	Not Found	Not Found	Not Found	Not Found	High	Not Found	Not Found	Not Found	Not Found	Not Found	Not Found	Not Found	Not Found
Q8NB37	Glutamine amidotransferase-like class 1 domain-containing protein 1 [OS=Homo sapiens]	25.322	36	17	4	Not Found	Not Found	Not Found	Not Found	Not Found	Not Found	High	Peak Found	Peak Found	Not Found	Not Found	Peak Found	High	High	High	Peak Found	High	High	High	High	High	Not Found	High	High	High	High
Q8NF91	Nesprin-1 [OS=Homo sapiens]	68.22	3	42	1	Not Found	Not Found	Not Found	Not Found	Not Found	Not Found	Not Found	Not Found	Not Found	Not Found	Not Found	Peak Found	Peak Found	High	Peak Found	Peak Found	Peak Found	Not Found	Not Found	Not Found	Not Found	Not Found	Not Found	Not Found	Peak Found	Peak Found
Q8TD47	40S ribosomal protein S4, Y isoform 2 [OS=Homo sapiens]	82.734	39	354	1	Not Found	Not Found	Not Found	Not Found	Not Found	Not Found	Not Found	Not Found	Not Found	Peak Found	High	Not Found	Not Found	Peak Found	High	Peak Found	High	Not Found	Not Found	Not Found	Not Found	Not Found	Not Found	Not Found	Not Found	Not Found
Q92629-1	Delta-sarcoglycan [OS=Homo sapiens]	11.549	14	11	3	Peak Found	Peak Found	Peak Found	Not Found	Not Found	Not Found	Peak Found	Peak Found	Not Found	Not Found	Peak Found	High	High	High	High	High	High	High	Peak Found	High	Not Found	Not Found	Peak Found	Peak Found	Peak Found	Peak Found
Q95604	HLA class I histocompatibility antigen, Cw-17 alpha chain [OS=Homo sapiens]	113.214	45	204	1	Not Found	Not Found	Not Found	Not Found	Not Found	Not Found	Not Found	Not Found	Not Found	Not Found	Not Found	Not Found	Not Found	Not Found	High	High	High	Peak Found	High	Peak Found	Not Found	Not Found	Not Found	Not Found	Not Found	Not Found
Q969E2-1	Secretory carrier-associated membrane protein 4 [OS=Homo sapiens]	6.595	10	8	2	Peak Found	Peak Found	Peak Found	Not Found	Not Found	Not Found	High	Not Found	High	Peak Found	Peak Found	Peak Found	Peak Found	High	Peak Found	Not Found	Not Found	Peak Found	Not Found	Not Found	Peak Found	High	High	High	High	High	Met-loss+Acetyl [N-Term]
Q96A00	Protein phosphatase 1 regulatory subunit 14A [OS=Homo sapiens]	38.238	35	38	3	Not Found	Not Found	Not Found	Not Found	High	High	Not Found	Not Found	Not Found	Not Found	Not Found	High	High	High	High	High	High	High	High	High	High	High	High	Not Found	Not Found	Peak Found
Q96AB6	Protein N-terminal asparagine amidohydrolase [OS=Homo sapiens]	4.909	7	1	1	Not Found	Not Found	Not Found	Not Found	Not Found	Not Found	Not Found	Not Found	Not Found	Not Found	Not Found	Not Found	Not Found	Not Found	Not Found	Not Found	Not Found	Not Found	Peak Found	Peak Found	Peak Found	Peak Found	High	Not Found	Not Found	Not Found
Q96CX2	BTB/POZ domain-containing protein KCTD12 [OS=Homo sapiens]	143.996	63	217	15	High	High	High	High	High	High	High	High	High	High	High	High	High	High	High	High	High	High	High	High	High	High	High	High	High	High
Q96ET8-1	Golgi apparatus membrane protein TVP23 homolog C [OS=Homo sapiens]	32.725	10	9	1	Not Found	Not Found	Not Found	Not Found	Not Found	Not Found	Not Found	High	High	Not Found	Not Found	High	High	High	Not Found	Not Found	Not Found	Not Found	Not Found	Not Found	Not Found	Not Found	Not Found	High	High	High	Acetyl [N-Term]
Q96M96-1	FYVE, RhoGEF and PH domain-containing protein 4 [OS=Homo sapiens]	50.117	23	32	11	Peak Found	Peak Found	Peak Found	Not Found	Peak Found	Not Found	Peak Found	Peak Found	Peak Found	Peak Found	Peak Found	High	High	High	Not Found	Not Found	Peak Found	Peak Found	Not Found	Peak Found	High	High	High	Not Found	Peak Found	Not Found
Q96PD2-1	Discoidin, CUB and LCCL domain-containing protein 2 [OS=Homo sapiens]	51.983	11	28	4	Not Found	Not Found	Not Found	Not Found	Not Found	Not Found	Peak Found	Not Found	Peak Found	High	Peak Found	High	High	High	High	High	High	High	Peak Found	Peak Found	Peak Found	High	Peak Found	Peak Found	High	High
Q9BQI5	SH3-containing GRB2-like protein 3-interacting protein 1 [OS=Homo sapiens]	5.504	3	2	1	Not Found	Not Found	Not Found	Not Found	Not Found	Not Found	Not Found	Not Found	Not Found	Not Found	Not Found	Not Found	Not Found	Peak Found	Not Found	Not Found	Not Found	Not Found	Not Found	Not Found	Not Found	Not Found	Not Found	Peak Found	High	Not Found
Q9BRK0-1	Receptor expression-enhancing protein 2 [OS=Homo sapiens]	8.491	10	3	1	Not Found	Not Found	Not Found	Not Found	Not Found	Not Found	Not Found	Not Found	Not Found	Not Found	Not Found	Not Found	Not Found	Not Found	Not Found	Not Found	Not Found	Peak Found	Not Found	Peak Found	Not Found	Not Found	Not Found	High	High	High
Q9BV36	Melanophilin [OS=Homo sapiens]	6.057	6	3	2	Not Found	Not Found	Not Found	Not Found	Not Found	Not Found	Not Found	Not Found	Not Found	Not Found	Not Found	Not Found	Not Found	Not Found	Peak Found	High	High	Not Found	Not Found	Not Found	Not Found	Not Found	Not Found	Not Found	Not Found	Peak Found
Q9BW30	Tubulin polymerization-promoting protein family member 3 [OS=Homo sapiens]	7.07	9	4	1	Not Found	Not Found	Not Found	Not Found	Not Found	Not Found	Not Found	Not Found	Not Found	Not Found	Not Found	Not Found	Not Found	Not Found	Not Found	Not Found	Not Found	High	High	High	Not Found	Not Found	Not Found	Not Found	Not Found	Not Found	Met-loss+Acetyl [N-Term]
Q9BY67	Cell adhesion molecule 1 [OS=Homo sapiens]	3.931	5	1	1	Not Found	Not Found	Not Found	Not Found	Not Found	Not Found	Peak Found	Peak Found	Not Found	Peak Found	Not Found	Not Found	Not Found	Not Found	Peak Found	High	Peak Found	Not Found	Peak Found	Peak Found	Not Found	Not Found	Not Found	Peak Found	Not Found	Peak Found
Q9BYC8	39S ribosomal protein L32, mitochondrial [OS=Homo sapiens]	5.671	12	3	1	Not Found	Not Found	Not Found	Not Found	Not Found	Not Found	Not Found	Not Found	Not Found	Not Found	Not Found	High	Not Found	Not Found	Not Found	Not Found	Not Found	Not Found	Not Found	Not Found	High	Not Found	High	Not Found	Not Found	Not Found
Q9H009	Nascent polypeptide-associated complex subunit alpha-2 [OS=Homo sapiens]	15.617	7	73	1	High	High	High	High	High	High	High	High	High	High	High	High	High	High	High	High	High	High	High	High	High	High	High	Peak Found	High	High
Q9H063	repressor of RNA polymerase III transcription MAF1 homolog [OS=Homo sapiens]	8.401	10	2	1	Not Found	Not Found	Not Found	Not Found	Not Found	Not Found	Not Found	Not Found	Not Found	Not Found	Not Found	Not Found	Not Found	Not Found	Not Found	Not Found	Not Found	Not Found	Not Found	Not Found	Peak Found	High	High	Not Found	Not Found	Not Found
Q9H4B7	tubulin beta-1 chain [OS=Homo sapiens]	70.39	10	1344	1	Peak Found	Peak Found	Peak Found	Not Found	Not Found	High	Not Found	Not Found	Not Found	Not Found	Not Found	Not Found	High	High	High	Peak Found	High	Not Found	Not Found	Not Found	High	High	High	Not Found	High	Not Found	Carbamyl [K252]
Q9NQT5	exosome complex component RRP40 [OS=Homo sapiens]	13.898	19	10	2	Peak Found	Peak Found	Peak Found	Peak Found	Peak Found	Peak Found	High	Peak Found	High	High	High	Peak Found	Peak Found	Peak Found	Peak Found	High	High	High	Peak Found	Peak Found	Peak Found	Peak Found	Peak Found	Peak Found	Peak Found	Peak Found	Met-loss+Acetyl [N-Term]
Q9NUJ3	T-complex protein 11-like protein 1 [OS=Homo sapiens]	14.457	8	3	2	Not Found	Not Found	High	Not Found	Not Found	Not Found	Not Found	Not Found	Not Found	Not Found	Not Found	Peak Found	High	High	Peak Found	Peak Found	Peak Found	Peak Found	Peak Found	Peak Found	Not Found	Not Found	Not Found	Not Found	Not Found	Not Found	Met-loss+Acetyl [N-Term]
Q9NWT6	Hypoxia-inducible factor 1-alpha inhibitor [OS=Homo sapiens]	5.738	5	1	1	Not Found	Not Found	Not Found	Not Found	Not Found	Not Found	Not Found	Not Found	Not Found	Not Found	Not Found	Not Found	Not Found	Not Found	Not Found	Not Found	Not Found	Peak Found	Not Found	Not Found	Peak Found	Peak Found	High	Not Found	Not Found	Not Found	Met-loss+Acetyl [N-Term]
Q9NZR1	Tropomodulin-2 [OS=Homo sapiens]	11.37	8	34	1	Not Found	Not Found	Not Found	Not Found	Not Found	Not Found	Peak Found	Not Found	Not Found	Peak Found	Not Found	Peak Found	High	High	High	High	Peak Found	High	High	High	Peak Found	Peak Found	Peak Found	High	High	High
Q9P2F6-1	Rho GTPase-activating protein 20 [OS=Homo sapiens]	8.157	2	23	1	Peak Found	High	High	Peak Found	Peak Found	High	Peak Found	Peak Found	Peak Found	Peak Found	Peak Found	Peak Found	High	High	Peak Found	Peak Found	High	High	Peak Found	High	Peak Found	High	Peak Found	High	High	High
Q9P2P5	E3 ubiquitin-protein ligase HECW2 [OS=Homo sapiens]	4.135	1	1	1	Not Found	Not Found	Not Found	Not Found	Not Found	Not Found	Not Found	Not Found	Not Found	Not Found	Not Found	High	Peak Found	Peak Found	Peak Found	Peak Found	Peak Found	Not Found	Not Found	Not Found	Not Found	Not Found	Not Found	Peak Found	Not Found	Not Found
Q9UBY9-1	Heat shock protein beta-7 [OS=Homo sapiens]	91.041	79	110	8	Peak Found	Peak Found	Peak Found	Not Found	Not Found	Peak Found	Peak Found	Peak Found	Peak Found	Peak Found	Peak Found	High	High	High	High	High	High	High	High	High	High	High	High	High	High	High
Q9UI42-1	Carboxypeptidase A4 [OS=Homo sapiens]	7.038	8	8	2	Not Found	Not Found	Not Found	Not Found	Not Found	Not Found	Not Found	Not Found	Not Found	Not Found	Not Found	High	High	High	Peak Found	Not Found	Not Found	Not Found	Not Found	Not Found	Not Found	Not Found	Not Found	Peak Found	High	High
Q9UJC5	SH3 domain-binding glutamic acid-rich-like protein 2 [OS=Homo sapiens]	6.266	13	3	1	Not Found	Not Found	Not Found	Not Found	Not Found	Not Found	Not Found	Not Found	Not Found	Not Found	Not Found	Not Found	Not Found	Not Found	Peak Found	Not Found	Peak Found	Peak Found	Peak Found	Not Found	Peak Found	Not Found	Not Found	High	High	High
Q9UKA9-1	Polypyrimidine tract-binding protein 2 [OS=Homo sapiens]	12.212	6	26	1	High	Not Found	Not Found	Not Found	Not Found	Not Found	Not Found	Not Found	Not Found	High	High	High	High	High	High	High	High	Peak Found	High	High	High	High	High	Not Found	Not Found	Not Found
Q9UKE5-1	Traf2 and NCK-interacting protein kinase [OS=Homo sapiens]	22.276	6	24	2	Not Found	Not Found	Not Found	Not Found	Not Found	Not Found	Not Found	Not Found	Not Found	Not Found	Not Found	High	High	High	Not Found	Not Found	Not Found	Not Found	Not Found	Not Found	Not Found	Not Found	Not Found	Not Found	Not Found	Not Found
Q9UM47	Neurogenic locus notch homolog protein 3 [OS=Homo sapiens]	7.797	1	2	1	Not Found	Not Found	Not Found	Not Found	Not Found	Not Found	Not Found	Not Found	Not Found	Not Found	Not Found	High	High	Peak Found	Not Found	Not Found	Not Found	Not Found	Not Found	Not Found	Not Found	Not Found	Not Found	Not Found	Not Found	Not Found
Q9UMS6	Synaptopodin-2 [OS=Homo sapiens]	166.616	31	161	21	Peak Found	Peak Found	Peak Found	Peak Found	High	High	High	High	High	High	High	High	High	High	Peak Found	Peak Found	Peak Found	High	High	High	High	High	High	Peak Found	Peak Found	Peak Found
Q9UQ03-1	Coronin-2B [OS=Homo sapiens]	36.842	20	42	6	Peak Found	High	High	High	High	High	Peak Found	Peak Found	High	High	Peak Found	High	High	High	High	High	High	High	Peak Found	Peak Found	Not Found	Not Found	Peak Found	High	High	High
Q9Y2S0-1	DNA-directed RNA polymerases I and III subunit RPAC2 [OS=Homo sapiens]	15.021	14	16	1	Peak Found	Peak Found	Peak Found	Not Found	Not Found	Not Found	High	Peak Found	High	High	Peak Found	Not Found	High	Peak Found	Peak Found	Peak Found	High	High	High	High	High	High	High	Not Found	Not Found	Not Found
Q9Y3M8-1	StAR-related lipid transfer protein 13 [OS=Homo sapiens]	18.225	4	7	3	Not Found	Not Found	Not Found	Not Found	Not Found	Not Found	Not Found	Peak Found	Peak Found	Not Found	Peak Found	High	High	High	Peak Found	High	High	Not Found	Not Found	Not Found	Peak Found	Peak Found	Peak Found	Not Found	Not Found	Not Found
Q9Y4F5	Centrosomal protein of 170 kDa protein B [OS=Homo sapiens]	10.386	2	3	2	Not Found	Not Found	Not Found	Not Found	Not Found	Not Found	Not Found	Not Found	Not Found	Not Found	Not Found	Not Found	Not Found	Not Found	Not Found	High	Not Found	Not Found	Not Found	Not Found	Not Found	Not Found	Not Found	High	High	Not Found
Q9Y625	Glypican-6 [OS=Homo sapiens]	9.535	6	1	1	Not Found	Not Found	Not Found	Not Found	Not Found	Not Found	Not Found	Not Found	Not Found	Not Found	Not Found	Peak Found	Peak Found	High	Not Found	Not Found	Not Found	Not Found	Not Found	Not Found	Not Found	Not Found	Not Found	Not Found	Not Found	Not Found
Q9Y6Y0	influenza virus NS1A-binding protein [OS=Homo sapiens]	12.549	4	3	1	Not Found	Not Found	Not Found	Not Found	Not Found	Not Found	Not Found	Not Found	Not Found	Not Found	Not Found	Not Found	Not Found	Not Found	Not Found	Not Found	Not Found	Not Found	Not Found	Not Found	Peak Found	High	High	Not Found	Not Found	Not Found
A0AVT1-1	Ubiquitin-like modifier-activating enzyme 6 [OS=Homo sapiens]	149.778	33	173	22	High	High	High	Peak Found	Peak Found	High	High	High	High	High	High	High	High	High	High	High	High	High	High	High	High	High	High	High	High	High	Acetyl [N-Term]
A0FGR8-2	Isoform 2 of Extended synaptotagmin-2 [OS=Homo sapiens]	79.818	24	109	15	High	High	High	Peak Found	Peak Found	High	High	High	High	High	High	High	High	High	High	High	High	Peak Found	High	High	High	High	High	High	High	High
A1A4S6	Rho GTPase-activating protein 10 [OS=Homo sapiens]	4.043	4	1	1	Not Found	Not Found	Not Found	Not Found	Not Found	High	Not Found	Not Found	Not Found	Not Found	Not Found	Not Found	Not Found	Not Found	Not Found	Not Found	Not Found	Not Found	Not Found	Not Found	Not Found	Not Found	Not Found	Not Found	Not Found	Not Found
A1L0T0	Acetolactate synthase-like protein [OS=Homo sapiens]	105.672	44	132	14	High	High	High	High	High	High	High	High	High	High	High	High	High	High	High	High	High	High	High	High	High	High	High	High	High	High
A1X283	SH3 and PX domain-containing protein 2B [OS=Homo sapiens]	13.569	6	2	2	Not Found	Not Found	Not Found	Not Found	Not Found	Not Found	Not Found	Not Found	Not Found	Not Found	Not Found	Not Found	Not Found	Not Found	Not Found	Not Found	Not Found	Not Found	High	High	Not Found	Not Found	Not Found	Not Found	Not Found	Not Found
A2RRP1-1	neuroblastoma-amplified sequence [OS=Homo sapiens]	34.016	6	26	8	Not Found	Not Found	Peak Found	Not Found	Not Found	Not Found	High	Peak Found	Peak Found	High	High	High	High	High	Peak Found	High	High	High	Peak Found	High	High	Peak Found	Peak Found	High	High	High	Acetyl [K2034]
A2RTX5	Probable threonine--tRNA ligase 2, cytoplasmic [OS=Homo sapiens]	15.203	6	27	1	Not Found	Not Found	Not Found	Not Found	Not Found	Not Found	Not Found	Not Found	Not Found	Not Found	Not Found	Not Found	Not Found	Not Found	High	Not Found	Not Found	Not Found	Not Found	Not Found	Not Found	Not Found	Not Found	Not Found	Not Found	Not Found	Carbamyl [K155]
A5A3E0	POTE ankyrin domain family member F [OS=Homo sapiens]	193.624	7	5195	1	Not Found	Not Found	Not Found	Not Found	Not Found	Not Found	Not Found	Not Found	Not Found	Not Found	Not Found	Not Found	Not Found	Not Found	Not Found	Not Found	Not Found	Not Found	Not Found	Not Found	Not Found	Not Found	Not Found	High	Not Found	Not Found	Carbamyl [K1073]
A5YKK6	CCR4-NOT transcription complex subunit 1 [OS=Homo sapiens]	15.594	3	28	5	High	High	High	Peak Found	Peak Found	Peak Found	High	High	High	High	High	High	High	High	High	High	High	Peak Found	High	High	High	High	High	Peak Found	Peak Found	Peak Found
A6NDG6	glycerol-3-phosphate phosphatase [OS=Homo sapiens]	49.966	47	63	8	Peak Found	High	Peak Found	Peak Found	Not Found	Peak Found	High	High	High	High	High	High	High	High	High	High	High	High	High	High	High	High	High	High	High	High
A6NDU8	UPF0600 protein C5orf51 [OS=Homo sapiens]	8.255	13	5	2	High	Peak Found	Peak Found	Not Found	Not Found	Not Found	Peak Found	High	Peak Found	Peak Found	Peak Found	Peak Found	Peak Found	Peak Found	Peak Found	Peak Found	High	Peak Found	Peak Found	Peak Found	Peak Found	Peak Found	High	Not Found	Not Found	Not Found	Met-loss+Acetyl [N-Term]
A6NHR9-1	structural maintenance of chromosomes flexible hinge domain-containing protein 1 [OS=Homo sapiens]	16.358	3	11	4	High	High	High	Not Found	Not Found	Not Found	Peak Found	Peak Found	High	High	High	Peak Found	Peak Found	Peak Found	Peak Found	Peak Found	High	Peak Found	Peak Found	Peak Found	High	Not Found	Not Found	Not Found	Not Found	Not Found
A6NIH7	Protein unc-119 homolog B [OS=Homo sapiens]	4.235	12	3	2	Peak Found	Peak Found	Peak Found	Not Found	Not Found	Not Found	Peak Found	Peak Found	High	Peak Found	High	Peak Found	Peak Found	Peak Found	Peak Found	Peak Found	Peak Found	High	Peak Found	Peak Found	Peak Found	Peak Found	Peak Found	Peak Found	Peak Found	Peak Found
A7E2Y1	Myosin-7B [OS=Homo sapiens]	8.518	1	63	1	Not Found	Not Found	Not Found	Not Found	Not Found	Not Found	Not Found	Not Found	Not Found	High	Not Found	Not Found	Not Found	Not Found	Not Found	Not Found	Not Found	Not Found	Not Found	Not Found	High	Not Found	Not Found	Not Found	Not Found	Not Found	Carbamyl [K1050]
A8CG34-1	Nuclear envelope pore membrane protein POM 121C [OS=Homo sapiens]	5.109	2	2	1	Not Found	Not Found	Not Found	Not Found	Not Found	Not Found	Not Found	Not Found	Not Found	Not Found	Not Found	Not Found	Not Found	Not Found	Not Found	Not Found	Not Found	Not Found	Not Found	Not Found	High	Not Found	High	Not Found	Not Found	Not Found
C9JLW8	Mapk-regulated corepressor-interacting protein 1 [OS=Homo sapiens]	29.893	58	42	5	Peak Found	Peak Found	Peak Found	Peak Found	Peak Found	High	High	High	High	High	High	High	High	High	High	High	High	High	High	High	High	High	High	High	High	High
E9PRG8	Uncharacterized protein C11orf98 [OS=Homo sapiens]	6.027	11	5	1	Peak Found	Peak Found	Peak Found	Not Found	Not Found	Not Found	Peak Found	Peak Found	High	High	Peak Found	Peak Found	High	Peak Found	Peak Found	Peak Found	Peak Found	Peak Found	High	Peak Found	Peak Found	High	Peak Found	Peak Found	Peak Found	Peak Found
O00115	Deoxyribonuclease-2-alpha [OS=Homo sapiens]	14.826	12	6	2	Not Found	Not Found	Peak Found	Not Found	Not Found	Peak Found	Peak Found	Peak Found	Peak Found	Not Found	Peak Found	Peak Found	Peak Found	Peak Found	Peak Found	Peak Found	Peak Found	Peak Found	Peak Found	Peak Found	Peak Found	Peak Found	Peak Found	High	Peak Found	High
O00116	Alkyldihydroxyacetonephosphate synthase, peroxisomal [OS=Homo sapiens]	100.707	30	109	12	High	High	High	High	High	High	High	High	High	High	High	High	High	High	High	High	High	High	High	High	High	High	High	High	High	High
O00139-2	Isoform 2 of Kinesin-like protein KIF2A [OS=Homo sapiens]	12.587	3	25	1	High	High	Not Found	Not Found	Not Found	Not Found	High	High	High	High	High	Not Found	Peak Found	High	High	High	High	High	High	Peak Found	High	High	High	High	High	High
O00148	ATP-dependent RNA helicase DDX39A [OS=Homo sapiens]	155.317	57	413	7	Peak Found	High	High	Peak Found	High	High	High	High	High	High	High	Peak Found	High	High	High	High	High	High	High	High	High	High	High	Peak Found	Peak Found	Peak Found	Met-loss+Acetyl [N-Term]
O00151	PDZ and LIM domain protein 1 [OS=Homo sapiens]	566.522	84	952	26	High	High	High	High	High	High	High	High	High	High	High	High	High	High	High	High	High	High	High	High	High	High	High	High	High	High	Met-loss+Acetyl [N-Term]; Carbamyl [K211]
O00154-4	Isoform 4 of Cytosolic acyl coenzyme A thioester hydrolase [OS=Homo sapiens]	182.741	75	437	17	High	High	High	High	Peak Found	High	High	High	High	High	High	High	High	High	High	High	High	High	High	High	High	High	High	High	High	High	Met-loss+Acetyl [N-Term]
O00159-1	Unconventional myosin-Ic [OS=Homo sapiens]	396.706	52	901	1	High	Peak Found	High	Peak Found	Not Found	Not Found	High	High	High	High	High	High	High	Peak Found	High	Peak Found	High	High	High	High	High	High	High	Peak Found	High	High
O00159-2	Isoform 2 of Unconventional myosin-Ic [OS=Homo sapiens]	396.038	54	881	1	High	High	Peak Found	Not Found	Not Found	Not Found	Peak Found	High	Peak Found	Peak Found	Peak Found	High	High	High	Peak Found	Peak Found	Peak Found	Not Found	Not Found	Not Found	Not Found	Peak Found	Peak Found	Not Found	Not Found	Not Found	Acetyl [N-Term]
O00161	Synaptosomal-associated protein 23 [OS=Homo sapiens]	61.323	56	57	8	High	High	High	Peak Found	Peak Found	Not Found	Peak Found	High	High	High	High	High	High	High	Peak Found	High	High	Peak Found	Peak Found	Peak Found	High	High	High	Peak Found	Peak Found	High
O00170	AH receptor-interacting protein [OS=Homo sapiens]	45.319	44	100	11	High	High	High	Peak Found	Peak Found	Peak Found	High	High	High	High	High	High	High	High	High	High	High	High	High	High	High	High	High	Peak Found	Peak Found	Peak Found
O00178	GTP-binding protein 1 [OS=Homo sapiens]	16.19	5	14	2	Not Found	Not Found	Not Found	Not Found	Not Found	Not Found	High	High	High	Peak Found	High	Peak Found	High	Peak Found	Peak Found	High	High	Peak Found	Peak Found	High	High	High	High	High	Not Found	Not Found
O00186	syntaxin-binding protein 3 [OS=Homo sapiens]	58.641	21	61	7	Peak Found	High	Peak Found	Not Found	Not Found	Not Found	High	High	High	High	High	High	High	High	High	High	High	High	High	High	High	High	High	High	High	High
O00193	Small acidic protein [OS=Homo sapiens]	74.378	25	81	4	Not Found	Not Found	Not Found	Not Found	Not Found	Not Found	High	High	High	High	High	High	High	High	High	High	High	High	High	High	High	High	High	Peak Found	High	High
O00194	ras-related protein rab-27b [OS=Homo sapiens]	4.581	11	1	1	Not Found	Not Found	Not Found	Not Found	Not Found	Not Found	Not Found	Not Found	Not Found	Not Found	Not Found	Not Found	High	Not Found	Not Found	Not Found	Not Found	Not Found	Not Found	Not Found	Not Found	Not Found	Not Found	Not Found	Not Found	Not Found
O00203-1	AP-3 complex subunit beta-1 [OS=Homo sapiens]	172.529	31	365	27	High	High	High	High	Peak Found	Peak Found	High	High	High	High	High	High	High	High	High	High	High	High	High	High	High	High	High	High	High	High
O00217	NADH dehydrogenase [ubiquinone] iron-sulfur protein 8, mitochondrial [OS=Homo sapiens]	36.491	31	69	5	High	High	High	Not Found	High	High	High	High	High	High	High	High	High	High	High	High	High	High	High	High	High	High	High	Peak Found	Peak Found	Peak Found
O00231	26S proteasome non-ATPase regulatory subunit 11 [OS=Homo sapiens]	158.746	58	484	20	High	High	High	High	High	High	High	High	High	High	High	High	High	High	High	High	High	High	High	High	High	High	High	High	High	High	Met-loss+Acetyl [N-Term]
O00232-1	26s proteasome non-atpase regulatory subunit 12 [OS=Homo sapiens]	124.713	49	242	19	High	High	High	High	High	High	High	High	High	High	High	High	High	High	High	High	High	High	High	High	High	High	High	High	High	High
O00233-1	26S proteasome non-ATPase regulatory subunit 9 [OS=Homo sapiens]	72.568	51	254	10	High	High	High	High	High	High	High	High	High	High	High	High	High	High	High	High	High	High	High	High	High	High	High	High	High	High	Carbamyl [K123]
O00244	Copper transport protein ATOX1 [OS=Homo sapiens]	53.103	90	116	6	High	High	Peak Found	High	Peak Found	Peak Found	High	High	High	High	High	High	High	High	High	High	High	High	High	High	High	High	High	High	High	High	Met-loss [N-Term]
O00264	Membrane-associated progesterone receptor component 1 [OS=Homo sapiens]	133.462	60	271	10	High	High	High	High	High	High	High	High	High	High	High	High	High	High	High	High	High	High	High	High	High	High	High	High	High	High
O00267	Transcription elongation factor Spt5 [OS=Homo sapiens]	31.681	9	31	6	High	High	High	Not Found	Not Found	Not Found	High	High	High	High	High	Peak Found	High	High	High	High	High	Peak Found	High	High	High	High	High	Peak Found	Peak Found	Peak Found
O00273-1	DNA fragmentation factor subunit alpha [OS=Homo sapiens]	55.978	41	84	9	Peak Found	Peak Found	High	High	Peak Found	Peak Found	High	High	High	High	High	High	High	High	High	High	High	High	High	High	High	High	High	High	High	High	Acetyl [N-Term]
O00291	Huntingtin-interacting protein 1 [OS=Homo sapiens]	46.981	15	33	9	High	High	High	Peak Found	Peak Found	Peak Found	High	High	High	High	Peak Found	Peak Found	Not Found	Peak Found	High	Peak Found	Peak Found	High	High	High	Peak Found	High	Not Found	High	High	High
O00299	chloride intracellular channel protein 1 [OS=Homo sapiens]	404.729	85	1325	19	High	High	High	High	High	High	High	High	High	High	High	High	High	High	High	High	High	High	High	High	High	High	High	High	High	High	Acetyl [K166]; Carbamyl [K166]; Met-loss+Acetyl [N-Term]
O00303	Eukaryotic translation initiation factor 3 subunit F [OS=Homo sapiens]	176.833	63	390	13	High	High	High	High	High	High	High	High	High	High	High	High	High	High	High	High	High	High	High	High	High	High	High	High	High	High
O00330-1	Pyruvate dehydrogenase protein X component, mitochondrial [OS=Homo sapiens]	9.925	8	6	3	Peak Found	High	Peak Found	Not Found	Not Found	Not Found	High	High	Peak Found	Peak Found	Peak Found	Peak Found	Peak Found	Peak Found	Peak Found	Peak Found	Peak Found	Peak Found	Peak Found	Peak Found	Peak Found	High	Peak Found	High	Peak Found	Peak Found
O00391	Sulfhydryl oxidase 1 [OS=Homo sapiens]	13.691	8	9	4	Not Found	Not Found	Peak Found	Not Found	Not Found	Not Found	Peak Found	Peak Found	Peak Found	Peak Found	Peak Found	High	Peak Found	High	High	Peak Found	Peak Found	Not Found	Not Found	Peak Found	Not Found	Not Found	Not Found	High	High	High
O00399	Dynactin subunit 6 [OS=Homo sapiens]	25.163	27	34	4	High	Peak Found	Peak Found	Peak Found	Peak Found	High	High	High	High	High	High	High	High	High	Peak Found	Peak Found	High	High	High	High	Peak Found	Peak Found	Peak Found	High	High	High
O00401	Neural Wiskott-Aldrich syndrome protein [OS=Homo sapiens]	41.263	12	48	3	Peak Found	High	Peak Found	Not Found	Peak Found	Not Found	High	High	High	High	High	High	High	High	High	High	High	High	High	High	Peak Found	Peak Found	Peak Found	High	High	High
O00410	Importin-5 [OS=Homo sapiens]	649.772	67	1122	46	High	High	High	High	High	High	High	High	High	High	High	High	High	High	High	High	High	High	High	High	High	High	High	High	High	High	Met-loss+Acetyl [N-Term]; Carbamyl [K617]
O00422	Histone deacetylase complex subunit SAP18 [OS=Homo sapiens]	42.677	41	65	4	Peak Found	High	High	Peak Found	Peak Found	Peak Found	High	High	High	High	High	Peak Found	High	High	High	High	High	High	High	High	High	High	High	Peak Found	Peak Found	Peak Found
O00423-1	Echinoderm microtubule-associated protein-like 1 [OS=Homo sapiens]	14.272	6	16	3	High	High	High	Not Found	Not Found	Not Found	High	High	Peak Found	Peak Found	Peak Found	Peak Found	High	Peak Found	High	High	High	Peak Found	Peak Found	Peak Found	Peak Found	Peak Found	Peak Found	High	Peak Found	High
O00425	Insulin-like growth factor 2 mRNA-binding protein 3 [OS=Homo sapiens]	122.096	40	155	13	Peak Found	Peak Found	Peak Found	High	Peak Found	Peak Found	High	High	High	Peak Found	Peak Found	High	High	High	High	High	High	High	Peak Found	High	High	High	High	High	High	High
O00429	Dynamin-1-like protein [OS=Homo sapiens]	237.102	50	427	1	Not Found	Not Found	Not Found	Not Found	Not Found	Not Found	Not Found	Peak Found	Not Found	Not Found	Not Found	Not Found	High	High	Peak Found	High	Peak Found	Not Found	Not Found	Not Found	Peak Found	Peak Found	Not Found	Not Found	Not Found	Not Found	Acetyl [N-Term]
O00429-4	Isoform 3 of Dynamin-1-like protein [OS=Homo sapiens]	233.619	53	435	1	Not Found	Not Found	Not Found	Not Found	Not Found	Not Found	Not Found	Not Found	Not Found	High	Peak Found	High	High	Not Found	High	High	Peak Found	High	High	Peak Found	High	High	High	Not Found	Not Found	Not Found	Acetyl [N-Term]
O00442	RNA 3'-terminal phosphate cyclase [OS=Homo sapiens]	52.754	26	114	6	Peak Found	High	Peak Found	Peak Found	Peak Found	Peak Found	High	High	High	High	High	High	High	High	High	High	High	High	High	High	High	High	High	High	High	High
O00461	Golgi integral membrane protein 4 [OS=Homo sapiens]	81.003	27	170	14	High	High	High	High	High	Peak Found	High	High	High	High	High	High	High	High	High	High	High	High	High	High	High	High	High	High	High	High
O00469-2	Isoform 2 of Procollagen-lysine,2-oxoglutarate 5-dioxygenase 2 [OS=Homo sapiens]	465.948	55	919	35	High	High	High	High	High	High	High	High	High	High	High	High	High	High	High	High	High	High	High	High	High	High	High	High	High	High
O00470	Homeobox protein Meis1 [OS=Homo sapiens]	18.486	21	4	4	Not Found	Not Found	Not Found	Not Found	Not Found	Not Found	Not Found	Peak Found	Peak Found	Not Found	Not Found	Not Found	Not Found	Not Found	Not Found	Not Found	Not Found	High	High	High	Peak Found	Peak Found	Not Found	Not Found	Not Found	Not Found
O00471	Exocyst complex component 5 [OS=Homo sapiens]	33.079	11	18	4	Peak Found	High	Peak Found	High	Not Found	Not Found	High	Peak Found	High	Peak Found	Peak Found	High	High	Peak Found	Peak Found	Peak Found	Peak Found	High	Peak Found	High	High	High	High	High	Peak Found	Peak Found	Met-loss+Acetyl [N-Term]
O00479	High mobility group nucleosome-binding domain-containing protein 4 [OS=Homo sapiens]	4.019	17	7	1	Not Found	Not Found	Not Found	Not Found	Not Found	Not Found	High	Peak Found	Peak Found	High	Peak Found	Peak Found	High	Peak Found	Peak Found	High	High	Peak Found	Peak Found	Peak Found	Not Found	Peak Found	Not Found	Peak Found	Peak Found	Peak Found
O00487	26S proteasome non-ATPase regulatory subunit 14 [OS=Homo sapiens]	140.533	50	247	8	High	High	High	High	High	High	High	High	High	High	High	High	High	High	High	High	High	High	High	High	High	High	High	High	High	High
O00499	Myc box-dependent-interacting protein 1 [OS=Homo sapiens]	65.008	22	69	8	Peak Found	Peak Found	Peak Found	Not Found	Not Found	Peak Found	High	High	High	High	High	High	High	High	High	High	High	High	High	High	High	High	High	High	Peak Found	High
O00505	Importin subunit alpha-4 [OS=Homo sapiens]	118.874	51	205	11	High	High	High	Peak Found	High	High	High	High	High	High	High	High	High	High	High	High	High	High	High	High	High	High	High	High	High	High	Met-loss+Acetyl [N-Term]
O00506	serine/threonine-protein kinase 25 [OS=Homo sapiens]	16.468	13	32	1	Not Found	Not Found	Not Found	Not Found	Not Found	Not Found	High	Not Found	High	High	High	High	High	High	Peak Found	High	High	Peak Found	Peak Found	Peak Found	Not Found	Not Found	Peak Found	Peak Found	Peak Found	Peak Found
O00541-1	Pescadillo homolog [OS=Homo sapiens]	27.317	16	39	7	High	High	High	Peak Found	High	Peak Found	Peak Found	High	High	High	High	Peak Found	Peak Found	Peak Found	Peak Found	High	Peak Found	Peak Found	Peak Found	Peak Found	High	High	High	Peak Found	High	Peak Found
O00560-1	Syntenin-1 [OS=Homo sapiens]	151.874	58	163	8	High	High	High	Peak Found	Peak Found	Peak Found	High	High	High	High	High	High	High	High	High	High	High	High	High	High	High	High	High	High	High	High	Met-loss+Acetyl [N-Term]
O00566	U3 small nucleolar ribonucleoprotein protein Mpp10 [OS=Homo sapiens]	15.559	8	15	3	High	High	Peak Found	Not Found	Not Found	Not Found	Peak Found	Peak Found	High	High	High	High	Peak Found	Peak Found	Peak Found	High	Peak Found	High	High	High	High	High	High	High	Peak Found	Peak Found
O00567	Nucleolar protein 56 [OS=Homo sapiens]	154.313	53	265	22	High	High	High	Peak Found	High	High	High	High	High	High	High	High	High	High	High	High	High	High	High	High	High	High	High	High	High	High
O00571	ATP-dependent RNA helicase DDX3X [OS=Homo sapiens]	291.747	62	957	10	High	High	High	High	High	High	High	High	High	High	High	High	High	High	High	High	High	High	High	High	High	High	High	High	High	High	Met-loss+Acetyl [N-Term]
O00584	Ribonuclease T2 [OS=Homo sapiens]	20.823	17	15	4	Peak Found	Peak Found	Peak Found	Not Found	Not Found	Not Found	Peak Found	Peak Found	Peak Found	Peak Found	Peak Found	Peak Found	Peak Found	Peak Found	Peak Found	Peak Found	Peak Found	High	High	Peak Found	High	High	High	High	High	High
O00622	Protein CYR61 [OS=Homo sapiens]	9.692	7	10	2	High	High	Not Found	Not Found	Not Found	Not Found	Not Found	Not Found	Peak Found	High	Peak Found	High	Peak Found	High	Peak Found	Peak Found	Peak Found	Peak Found	Peak Found	Not Found	High	High	High	Not Found	Not Found	Not Found
O00629	Importin subunit alpha-3 [OS=Homo sapiens]	194.934	60	317	13	High	High	High	High	High	High	High	High	High	High	High	High	High	High	High	High	High	High	High	High	High	High	High	High	High	High	Met-loss+Acetyl [N-Term]
O00743	Serine/threonine-protein phosphatase 6 catalytic subunit [OS=Homo sapiens]	17.74	16	39	4	Peak Found	Peak Found	Peak Found	Not Found	Not Found	Peak Found	High	High	High	High	High	High	High	High	High	High	High	High	High	High	High	High	High	High	High	High	Met-loss [N-Term]
O00754	Lysosomal alpha-mannosidase [OS=Homo sapiens]	77.479	16	46	9	Not Found	Not Found	Not Found	Not Found	Not Found	Not Found	High	High	High	High	High	High	High	High	Peak Found	High	High	High	Peak Found	High	High	High	High	High	High	High
O00764-1	Pyridoxal kinase [OS=Homo sapiens]	130.834	65	194	10	High	High	High	Peak Found	Peak Found	Peak Found	High	High	High	High	High	High	High	High	High	High	High	High	High	High	High	High	High	High	High	High
O00767	acyl-CoA desaturase [OS=Homo sapiens]	10.238	11	4	2	Peak Found	Peak Found	Peak Found	Not Found	Not Found	Not Found	High	High	Peak Found	Not Found	Peak Found	Peak Found	Peak Found	Peak Found	Not Found	Not Found	Not Found	High	Peak Found	Not Found	Peak Found	High	Not Found	Peak Found	Not Found	Peak Found	Met-loss [N-Term]
O14494	Phospholipid phosphatase 1 [OS=Homo sapiens]	20.537	16	5	2	Not Found	Not Found	Not Found	Not Found	Not Found	Not Found	High	High	Not Found	Not Found	Not Found	Not Found	Peak Found	Not Found	Not Found	Not Found	Not Found	Not Found	Not Found	Not Found	Not Found	Not Found	Not Found	Not Found	Not Found	Not Found
O14495	Phospholipid phosphatase 3 [OS=Homo sapiens]	20.431	20	22	5	High	High	High	High	High	High	High	High	Peak Found	Peak Found	Peak Found	High	High	High	Peak Found	High	High	Peak Found	Peak Found	Peak Found	Peak Found	High	Peak Found	Peak Found	Peak Found	Peak Found
O14497	AT-rich interactive domain-containing protein 1A [OS=Homo sapiens]	13.096	2	9	3	Not Found	Not Found	Not Found	Not Found	Not Found	Not Found	Not Found	High	High	High	High	Not Found	Not Found	Not Found	Peak Found	Not Found	Peak Found	Peak Found	Peak Found	Peak Found	High	High	Not Found	Not Found	Not Found	Not Found
O14530	Thioredoxin domain-containing protein 9 [OS=Homo sapiens]	50.843	35	86	5	High	High	High	Peak Found	Not Found	Peak Found	High	High	High	High	High	High	High	High	High	High	High	High	High	High	High	High	High	High	Peak Found	High
O14545	TRAF-type zinc finger domain-containing protein 1 [OS=Homo sapiens]	13.007	6	22	3	High	High	High	High	High	High	High	High	Peak Found	High	High	Peak Found	Peak Found	Peak Found	Peak Found	Peak Found	Peak Found	High	High	High	Peak Found	Peak Found	Peak Found	Peak Found	Peak Found	Peak Found
O14548	Cytochrome c oxidase subunit 7A-related protein, mitochondrial [OS=Homo sapiens]	5.991	11	3	1	Not Found	High	Peak Found	Not Found	Not Found	Not Found	Peak Found	High	Not Found	Not Found	Peak Found	Not Found	Not Found	High	Not Found	Not Found	Peak Found	Not Found	Not Found	Not Found	Not Found	Not Found	Not Found	Peak Found	Not Found	Not Found
O14562	Ubiquitin domain-containing protein UBFD1 [OS=Homo sapiens]	60.813	23	53	4	Peak Found	Peak Found	High	Peak Found	Peak Found	Peak Found	High	High	High	High	High	High	High	High	High	High	High	High	High	High	High	High	High	High	High	High
O14569	cytochrome b561 domain-containing protein 2 [OS=Homo sapiens]	4.316	6	3	1	Peak Found	Not Found	Peak Found	Not Found	Not Found	Not Found	Peak Found	Peak Found	Peak Found	Peak Found	Peak Found	Peak Found	Peak Found	Peak Found	Not Found	Peak Found	Peak Found	Not Found	Not Found	Not Found	Peak Found	Peak Found	Peak Found	High	High	High	Met-loss [N-Term]
O14579-1	coatomer subunit epsilon [OS=Homo sapiens]	208.811	62	367	12	High	High	High	Peak Found	High	High	High	High	High	High	High	High	High	High	High	High	High	High	High	High	High	High	High	High	High	High	Met-loss [N-Term]
O14613	cdc42 effector protein 2 [OS=Homo sapiens]	29.422	27	37	3	High	High	High	Not Found	Not Found	Peak Found	High	High	High	High	High	High	High	High	High	Not Found	High	High	High	High	Peak Found	High	Peak Found	Not Found	High	High
O14617-1	AP-3 complex subunit delta-1 [OS=Homo sapiens]	198.074	31	275	22	High	High	High	Peak Found	Peak Found	Peak Found	High	High	High	High	High	High	High	High	High	High	High	High	High	High	High	High	High	High	High	High
O14618	copper chaperone for superoxide dismutase [OS=Homo sapiens]	19.885	23	27	4	High	High	High	High	Peak Found	High	High	High	Peak Found	High	Not Found	High	High	High	High	High	High	High	High	High	High	Peak Found	High	Peak Found	Peak Found	High
O14653-1	Golgi SNAP receptor complex member 2 [OS=Homo sapiens]	29.981	39	29	6	Peak Found	Peak Found	Peak Found	Not Found	Not Found	Not Found	High	High	High	High	High	High	High	High	Peak Found	High	Peak Found	Peak Found	Peak Found	Peak Found	Peak Found	Peak Found	High	High	High	High	Acetyl [N-Term]
O14656	Torsin-1A [OS=Homo sapiens]	44.191	33	53	9	Peak Found	Peak Found	High	Peak Found	Not Found	Not Found	High	High	High	High	High	High	High	High	High	High	High	High	High	High	High	High	High	High	High	High
O14657	Torsin-1B [OS=Homo sapiens]	26.49	20	23	5	High	Peak Found	Peak Found	Not Found	Not Found	Not Found	Peak Found	High	High	High	High	High	High	Peak Found	Peak Found	Peak Found	Peak Found	Peak Found	Peak Found	Peak Found	High	High	High	High	High	High
O14672	Disintegrin and metalloproteinase domain-containing protein 10 [OS=Homo sapiens]	5.274	2	5	1	Not Found	Not Found	Not Found	Not Found	Not Found	Not Found	High	High	High	Peak Found	Peak Found	Peak Found	Peak Found	Peak Found	High	Peak Found	Peak Found	Peak Found	Peak Found	Not Found	High	Peak Found	Peak Found	Not Found	Not Found	Peak Found
O14734	Acyl-coenzyme A thioesterase 8 [OS=Homo sapiens]	39.824	18	21	3	Not Found	Not Found	Not Found	Not Found	Not Found	Not Found	High	High	Peak Found	High	Peak Found	Peak Found	High	Peak Found	Peak Found	Peak Found	Peak Found	Peak Found	Peak Found	Peak Found	Peak Found	High	Peak Found	High	High	High
O14737	Programmed cell death protein 5 [OS=Homo sapiens]	50.454	48	138	6	High	High	High	High	High	High	High	High	High	High	High	High	High	High	High	High	High	High	High	High	High	High	High	High	High	High
O14744	Protein arginine N-methyltransferase 5 [OS=Homo sapiens]	70.043	21	124	11	High	High	High	Peak Found	High	High	High	High	High	High	High	High	High	High	High	High	High	High	High	High	High	High	High	High	High	High	Met-loss+Acetyl [N-Term]
O14745	Na(+)/H(+) exchange regulatory cofactor NHE-RF1 [OS=Homo sapiens]	53.106	32	52	8	Peak Found	High	Peak Found	Not Found	Not Found	Peak Found	High	Peak Found	Peak Found	Peak Found	Peak Found	Peak Found	Peak Found	Peak Found	High	High	High	High	High	High	High	High	High	Peak Found	Not Found	Not Found
O14763	Tumor necrosis factor receptor superfamily member 10B [OS=Homo sapiens]	9.175	7	10	2	Not Found	Not Found	Not Found	Not Found	Not Found	Not Found	Peak Found	High	High	High	High	High	High	Peak Found	High	Peak Found	Peak Found	Peak Found	Peak Found	Peak Found	Not Found	Not Found	Not Found	Peak Found	Peak Found	Peak Found
O14773	Tripeptidyl-peptidase 1 [OS=Homo sapiens]	184.279	26	231	8	High	High	High	High	High	High	High	High	High	High	High	High	High	High	High	High	High	High	High	High	High	High	High	High	High	High
O14776-1	Transcription elongation regulator 1 [OS=Homo sapiens]	28.503	7	32	5	High	High	Peak Found	Not Found	Not Found	Not Found	High	High	High	High	High	Peak Found	Peak Found	Peak Found	High	High	High	High	High	High	Peak Found	High	High	Peak Found	Not Found	Peak Found
O14786-1	Neuropilin-1 [OS=Homo sapiens]	31.853	11	14	5	Not Found	Not Found	Not Found	Not Found	Not Found	Not Found	Peak Found	Not Found	High	Not Found	Not Found	High	High	High	High	High	High	Peak Found	Peak Found	Peak Found	Peak Found	High	Peak Found	Peak Found	Peak Found	Peak Found
O14787-2	Isoform 2 of Transportin-2 [OS=Homo sapiens]	64.761	19	181	5	Peak Found	High	Peak Found	Not Found	Not Found	Not Found	High	High	High	High	High	High	High	Peak Found	High	High	High	High	High	High	High	High	High	High	High	High	Acetyl [N-Term]
O14807-1	Ras-related protein M-Ras [OS=Homo sapiens]	4.827	13	1	1	Not Found	Not Found	Not Found	Not Found	Not Found	Not Found	Not Found	Not Found	Peak Found	Not Found	Peak Found	Not Found	Not Found	Not Found	Not Found	Not Found	Not Found	Not Found	Not Found	Not Found	Not Found	Peak Found	Peak Found	High	Peak Found	Peak Found
O14817	Tetraspanin-4 [OS=Homo sapiens]	20.797	11	20	1	Not Found	Not Found	Not Found	Not Found	Not Found	Not Found	High	High	High	High	High	High	High	High	Peak Found	High	High	Not Found	Not Found	Not Found	Not Found	Peak Found	Not Found	High	High	Peak Found
O14818-1	Proteasome subunit alpha type-7 [OS=Homo sapiens]	197.758	61	536	15	High	High	High	High	High	High	High	High	High	High	High	High	High	High	High	High	High	High	High	High	High	High	High	High	High	High
O14828	Secretory carrier-associated membrane protein 3 [OS=Homo sapiens]	97.301	31	157	7	High	Peak Found	High	Peak Found	Peak Found	Peak Found	High	High	High	High	High	High	High	High	High	High	High	High	High	High	High	High	High	High	High	High
O14879	Interferon-induced protein with tetratricopeptide repeats 3 [OS=Homo sapiens]	63.683	26	33	8	High	High	High	Peak Found	Not Found	Peak Found	High	High	High	High	High	Peak Found	High	Peak Found	Peak Found	High	Peak Found	Peak Found	High	Peak Found	High	High	High	Peak Found	Peak Found	Peak Found
O14880	Microsomal glutathione S-transferase 3 [OS=Homo sapiens]	75.959	68	102	6	Not Found	Not Found	Peak Found	Not Found	Not Found	Not Found	High	High	High	High	High	High	High	High	High	High	High	High	High	High	High	High	High	High	High	High
O14907	Tax1-binding protein 3 [OS=Homo sapiens]	90.215	70	171	5	High	High	High	High	High	High	High	High	High	High	High	High	High	High	High	High	High	High	High	High	High	High	High	High	High	High	Met-loss+Acetyl [N-Term]
O14908-1	PDZ domain-containing protein GIPC1 [OS=Homo sapiens]	104.102	55	161	15	High	High	High	Peak Found	Peak Found	Peak Found	High	High	High	High	High	High	High	High	High	High	High	High	High	High	High	High	High	High	High	High
O14920-1	Inhibitor of nuclear factor kappa-B kinase subunit beta [OS=Homo sapiens]	18.151	10	15	5	Peak Found	Peak Found	Peak Found	Not Found	Not Found	Not Found	Peak Found	Peak Found	High	High	Peak Found	High	High	High	High	High	Peak Found	Peak Found	Peak Found	Peak Found	High	High	Peak Found	High	High	Peak Found
O14925	Mitochondrial import inner membrane translocase subunit tim23 [OS=Homo sapiens]	9.452	15	2	2	Not Found	Not Found	Not Found	Not Found	Not Found	Not Found	Peak Found	Peak Found	High	Peak Found	High	Peak Found	Peak Found	Peak Found	Peak Found	Peak Found	Peak Found	Peak Found	Peak Found	Peak Found	Peak Found	Peak Found	Peak Found	Peak Found	Peak Found	Not Found
O14929	histone acetyltransferase type B catalytic subunit [OS=Homo sapiens]	16.223	9	14	2	Not Found	Not Found	Not Found	Not Found	Not Found	Not Found	Peak Found	Peak Found	High	High	High	Peak Found	Peak Found	High	Peak Found	High	High	Peak Found	Peak Found	High	Peak Found	Peak Found	Not Found	Not Found	Not Found	Peak Found
O14933	Ubiquitin/ISG15-conjugating enzyme E2 L6 [OS=Homo sapiens]	29.956	39	25	3	Not Found	Not Found	Not Found	Not Found	Not Found	Not Found	High	High	Peak Found	High	High	Peak Found	Peak Found	High	Peak Found	High	High	High	High	High	Peak Found	Peak Found	Peak Found	Peak Found	Not Found	Not Found
O14936	peripheral plasma membrane protein CASK [OS=Homo sapiens]	19.535	4	10	2	Peak Found	High	Peak Found	Not Found	Not Found	Not Found	High	High	Peak Found	High	High	Not Found	Not Found	Not Found	Peak Found	Not Found	Peak Found	Peak Found	Peak Found	Peak Found	Peak Found	High	High	High	High	Peak Found
O14949	Cytochrome b-c1 complex subunit 8 [OS=Homo sapiens]	11.624	29	26	3	High	High	High	High	High	Peak Found	High	High	High	High	High	High	High	High	High	Peak Found	Peak Found	Peak Found	Peak Found	Peak Found	Peak Found	Peak Found	Peak Found	High	High	High
O14950	Myosin regulatory light chain 12B [OS=Homo sapiens]	298.381	80	977	1	Not Found	Not Found	Not Found	Not Found	Not Found	Not Found	High	High	High	High	High	Not Found	Not Found	High	Not Found	Not Found	High	Not Found	Not Found	Not Found	Not Found	Not Found	Not Found	High	High	Not Found	Carbamyl [K51]
O14964	Hepatocyte growth factor-regulated tyrosine kinase substrate [OS=Homo sapiens]	80.99	26	163	13	High	High	High	High	High	High	High	High	High	High	High	High	High	High	High	High	High	High	High	High	High	High	High	High	High	High
O14967	calmegin [OS=Homo sapiens]	26.928	13	46	5	High	Peak Found	Peak Found	Peak Found	High	Peak Found	Peak Found	Peak Found	Peak Found	Peak Found	Peak Found	Peak Found	High	High	High	High	High	High	Peak Found	High	Peak Found	Peak Found	Peak Found	Peak Found	Peak Found	Peak Found
O14972	Down syndrome critical region protein 3 [OS=Homo sapiens]	8.7	8	4	2	Not Found	Not Found	Not Found	Not Found	Not Found	Not Found	Peak Found	Peak Found	Peak Found	Peak Found	Peak Found	Peak Found	Peak Found	High	High	High	Peak Found	Peak Found	Peak Found	Peak Found	Not Found	Not Found	Peak Found	Peak Found	Peak Found	High
O14974	Protein phosphatase 1 regulatory subunit 12A [OS=Homo sapiens]	245.062	40	446	33	High	High	High	High	High	High	High	High	High	High	High	High	High	High	High	High	High	High	High	High	High	High	High	High	High	High
O14976	Cyclin-G-associated kinase [OS=Homo sapiens]	28.581	3	58	2	Not Found	Not Found	Not Found	Not Found	Not Found	Not Found	High	High	High	High	High	High	High	High	High	High	High	High	High	High	High	High	High	High	High	High	Met-loss+Acetyl [N-Term]
O14979-2	Isoform 2 of Heterogeneous nuclear ribonucleoprotein D-like [OS=Homo sapiens]	204.002	46	513	13	High	High	High	High	High	High	High	High	High	High	High	High	High	High	High	High	High	High	High	High	High	High	High	High	High	High	Acetyl [N-Term]
O14980	Exportin-1 [OS=Homo sapiens]	247.842	37	413	28	High	High	High	High	High	High	High	High	High	High	High	High	High	High	High	High	High	High	High	High	High	High	High	High	High	High	Met-loss [N-Term]
O15013	rho guanine nucleotide exchange factor 10 [OS=Homo sapiens]	5.797	1	3	1	Not Found	Not Found	Not Found	Not Found	Not Found	Not Found	Not Found	Not Found	High	Not Found	Not Found	High	Peak Found	Peak Found	High	Peak Found	Not Found	Not Found	Not Found	Not Found	Not Found	Peak Found	Not Found	Not Found	Not Found	Not Found
O15027-1	Protein transport protein Sec16A [OS=Homo sapiens]	84.1	10	67	11	High	High	High	Peak Found	Peak Found	Peak Found	High	High	High	High	High	High	High	High	High	High	High	High	High	High	High	High	Peak Found	High	High	High
O15031	Plexin-B2 [OS=Homo sapiens]	120.869	16	102	14	High	Peak Found	High	Not Found	Not Found	Not Found	High	High	High	High	High	High	High	High	High	High	High	High	High	High	High	High	High	High	High	Peak Found
O15042	U2 snRNP-associated SURP motif-containing protein [OS=Homo sapiens]	28.096	6	23	5	Peak Found	High	High	Not Found	Not Found	Not Found	High	High	High	High	High	High	High	High	High	High	High	Peak Found	Peak Found	Peak Found	High	Peak Found	Peak Found	Peak Found	Peak Found	Peak Found
O15056	Synaptojanin-2 [OS=Homo sapiens]	6.021	2	1	1	Not Found	Not Found	Not Found	Not Found	Not Found	Not Found	Not Found	Not Found	Not Found	Not Found	Not Found	Not Found	High	Not Found	Not Found	Not Found	Not Found	Not Found	Not Found	Not Found	Not Found	Not Found	Not Found	Not Found	Not Found	Not Found
O15061-1	Synemin [OS=Homo sapiens]	293.01	40	178	39	High	Peak Found	High	High	High	High	Peak Found	Peak Found	Peak Found	Peak Found	Peak Found	Peak Found	Peak Found	Peak Found	High	High	High	High	High	High	High	High	High	High	High	High
O15067	Phosphoribosylformylglycinamidine synthase [OS=Homo sapiens]	176.862	30	235	22	High	High	High	Not Found	Peak Found	High	High	High	High	High	High	High	High	High	High	High	High	High	High	High	High	High	High	Peak Found	Peak Found	Peak Found
O15084-1	Isoform 3 of Serine/threonine-protein phosphatase 6 regulatory ankyrin repeat subunit A [OS=Homo sapiens]	11.792	3	13	2	Not Found	Not Found	Not Found	Not Found	Not Found	Not Found	High	High	High	High	High	High	Peak Found	High	High	High	Peak Found	High	Peak Found	Peak Found	Not Found	Not Found	Not Found	Not Found	Not Found	Not Found
O15116	U6 snRNA-associated Sm-like protein LSm1 [OS=Homo sapiens]	59.73	59	45	5	Peak Found	Peak Found	Peak Found	Not Found	Not Found	Not Found	High	High	High	High	High	Peak Found	High	High	High	Peak Found	High	High	High	High	High	High	High	Peak Found	Peak Found	Peak Found	Acetyl [N-Term]
O15118	Niemann-Pick C1 protein [OS=Homo sapiens]	43.798	8	25	6	High	High	High	Peak Found	Not Found	Not Found	High	High	High	Peak Found	High	Peak Found	Peak Found	Peak Found	Peak Found	Peak Found	Peak Found	Peak Found	Peak Found	Peak Found	Peak Found	Peak Found	High	High	High	High
O15121	Sphingolipid delta(4)-desaturase DES1 [OS=Homo sapiens]	16.733	10	18	2	Not Found	Not Found	Not Found	Not Found	Not Found	Not Found	High	High	High	High	High	High	High	High	High	Peak Found	Peak Found	Not Found	Not Found	Not Found	Peak Found	Peak Found	High	High	High	High
O15126-1	Secretory carrier-associated membrane protein 1 [OS=Homo sapiens]	57.874	33	101	6	Peak Found	Peak Found	Peak Found	Peak Found	Peak Found	Peak Found	High	High	High	High	High	High	High	High	High	High	High	High	High	High	High	High	High	High	High	High	Met-loss+Acetyl [N-Term]
O15127	Secretory carrier-associated membrane protein 2 [OS=Homo sapiens]	14.655	10	19	2	Peak Found	Peak Found	Peak Found	Not Found	Not Found	Not Found	High	High	Peak Found	Peak Found	Peak Found	High	Peak Found	High	High	High	High	High	High	High	High	High	High	High	High	High
O15143	Actin-related protein 2/3 complex subunit 1B [OS=Homo sapiens]	242.094	63	639	16	High	High	High	High	High	High	High	High	High	High	High	High	High	High	High	High	High	High	High	High	High	High	High	High	High	High	Met-loss+Acetyl [N-Term]
O15144	Actin-related protein 2/3 complex subunit 2 [OS=Homo sapiens]	246.069	74	661	22	High	High	High	High	High	High	High	High	High	High	High	High	High	High	High	High	High	High	High	High	High	High	High	High	High	High
O15145	Actin-related protein 2/3 complex subunit 3 [OS=Homo sapiens]	85.795	50	214	7	High	High	High	Peak Found	High	Peak Found	High	High	High	High	High	High	High	High	High	High	High	High	High	High	High	High	High	High	High	High	Met-loss [N-Term]
O15160	DNA-directed RNA polymerases I and III subunit RPAC1 [OS=Homo sapiens]	66.775	36	49	8	Peak Found	Peak Found	High	Peak Found	Peak Found	Peak Found	High	High	High	High	High	High	High	High	High	High	High	High	High	High	Peak Found	High	High	Peak Found	Peak Found	Peak Found	Met-loss+Acetyl [N-Term]
O15173	Membrane-associated progesterone receptor component 2 [OS=Homo sapiens]	103.586	48	245	9	High	High	High	Peak Found	High	High	High	High	High	High	High	High	High	High	High	High	High	High	High	High	High	High	High	High	High	High
O15228	Dihydroxyacetone phosphate acyltransferase [OS=Homo sapiens]	15.641	5	18	3	Not Found	Not Found	Not Found	Not Found	Not Found	Not Found	High	High	High	High	High	High	High	Peak Found	High	High	High	Peak Found	Peak Found	Peak Found	Not Found	Peak Found	Not Found	High	High	High
O15254	Peroxisomal acyl-coenzyme A oxidase 3 [OS=Homo sapiens]	21.701	9	10	5	Peak Found	Peak Found	Not Found	Not Found	Not Found	Not Found	Peak Found	Peak Found	Not Found	Peak Found	Not Found	Peak Found	Peak Found	Peak Found	Peak Found	Peak Found	Peak Found	Not Found	Not Found	Not Found	Not Found	Peak Found	Peak Found	High	High	High
O15258	Protein RER1 [OS=Homo sapiens]	35.27	19	46	2	Peak Found	High	High	Not Found	Not Found	Not Found	High	High	High	High	High	Peak Found	High	High	High	High	High	High	Peak Found	Peak Found	High	High	High	High	High	High	Met-loss [N-Term]; Met-loss+Acetyl [N-Term]
O15260-1	surfeit locus protein 4 [OS=Homo sapiens]	70.251	28	212	6	High	High	High	High	High	High	High	High	High	High	High	High	High	High	High	High	High	High	High	High	High	High	High	High	High	High	Met-loss [N-Term]; Met-loss+Acetyl [N-Term]
O15270	Serine palmitoyltransferase 2 [OS=Homo sapiens]	37.369	22	18	7	Not Found	Peak Found	Peak Found	Not Found	Not Found	Not Found	High	Peak Found	Peak Found	High	High	Peak Found	High	Peak Found	Peak Found	Peak Found	Peak Found	High	Peak Found	Peak Found	Peak Found	Peak Found	High	High	High	High
O15294	UDP-N-acetylglucosamine--peptide N-acetylglucosaminyltransferase 110 kDa subunit [OS=Homo sapiens]	38.673	9	28	6	High	Peak Found	High	Not Found	Peak Found	Peak Found	High	High	High	High	High	High	High	High	High	High	High	High	High	High	Peak Found	Peak Found	Peak Found	Peak Found	Peak Found	Peak Found	Met-loss+Acetyl [N-Term]
O15305	Phosphomannomutase 2 [OS=Homo sapiens]	39.376	36	109	6	High	High	High	Peak Found	High	High	High	High	High	High	High	High	High	High	High	High	High	High	High	High	High	High	High	High	High	High	Met-loss+Acetyl [N-Term]
O15320	Endoplasmic reticulum export factor CTAGE5 [OS=Homo sapiens]	18.909	6	10	3	Not Found	Not Found	Not Found	Not Found	Not Found	Not Found	Peak Found	High	High	Peak Found	Peak Found	Peak Found	High	Peak Found	High	Peak Found	High	Peak Found	Peak Found	Peak Found	Peak Found	High	Peak Found	High	Peak Found	High
O15321-1	Transmembrane 9 superfamily member 1 [OS=Homo sapiens]	8.794	6	17	2	High	High	High	Not Found	Not Found	Not Found	High	High	Peak Found	Peak Found	Peak Found	High	High	High	High	Not Found	Not Found	Not Found	Not Found	Not Found	Peak Found	High	High	High	High	High
O15347	High mobility group protein B3 [OS=Homo sapiens]	22.021	42	46	5	High	High	High	Peak Found	Peak Found	Peak Found	High	High	High	High	High	Peak Found	Peak Found	Peak Found	High	High	High	High	High	High	High	High	High	Not Found	Not Found	Not Found
O15355	Protein phosphatase 1G [OS=Homo sapiens]	121.952	46	207	16	High	High	High	High	High	High	High	High	High	High	High	High	High	High	High	High	High	High	High	High	High	High	High	Peak Found	Peak Found	Peak Found
O15357	Phosphatidylinositol 3,4,5-trisphosphate 5-phosphatase 2 [OS=Homo sapiens]	9.334	2	5	2	Peak Found	Peak Found	Peak Found	Not Found	Not Found	Not Found	Peak Found	Peak Found	High	Peak Found	Peak Found	High	Peak Found	Peak Found	Peak Found	Peak Found	Peak Found	Peak Found	Peak Found	Peak Found	High	High	Peak Found	Peak Found	Peak Found	High
O15371	Eukaryotic translation initiation factor 3 subunit D [OS=Homo sapiens]	169.394	51	282	17	High	High	High	Peak Found	High	High	High	High	High	High	High	High	High	High	High	High	High	High	High	High	High	High	High	High	High	High
O15372	Eukaryotic translation initiation factor 3 subunit H [OS=Homo sapiens]	146.226	68	226	17	High	High	High	High	High	High	High	High	High	High	High	High	High	High	High	High	High	High	High	High	High	High	High	High	High	High
O15382	Branched-chain-amino-acid aminotransferase, mitochondrial [OS=Homo sapiens]	20.693	12	25	3	Not Found	Not Found	Not Found	Not Found	Not Found	Not Found	Peak Found	High	Peak Found	Peak Found	Peak Found	High	High	High	High	High	High	High	High	High	High	High	High	High	High	High
O15394	Neural cell adhesion molecule 2 [OS=Homo sapiens]	17.905	6	5	3	Not Found	Not Found	Not Found	Not Found	Not Found	Not Found	Peak Found	Peak Found	Peak Found	Peak Found	Peak Found	High	High	High	Peak Found	Peak Found	Peak Found	Peak Found	Peak Found	Peak Found	Not Found	Not Found	Peak Found	Not Found	Not Found	Not Found
O15397-1	Importin-8 [OS=Homo sapiens]	36.444	7	32	4	High	Not Found	Not Found	Peak Found	Not Found	Not Found	Peak Found	High	High	High	High	Peak Found	High	Peak Found	Peak Found	Peak Found	Peak Found	Peak Found	Peak Found	Peak Found	Peak Found	Not Found	Peak Found	Not Found	High	Not Found
O15400	Syntaxin-7 [OS=Homo sapiens]	69.609	63	136	10	High	High	High	High	High	High	High	High	High	High	High	High	High	High	High	High	High	High	High	High	High	High	High	High	High	High	Met-loss+Acetyl [N-Term]
O15427	Monocarboxylate transporter 4 [OS=Homo sapiens]	26.184	19	78	6	High	High	High	Peak Found	Peak Found	High	High	High	High	High	High	High	High	High	High	High	High	High	High	High	High	High	High	High	High	High	Met-loss [N-Term]
O15431	High affinity copper uptake protein 1 [OS=Homo sapiens]	11.093	10	15	1	Not Found	Not Found	Not Found	Not Found	Not Found	Not Found	High	High	High	High	High	Peak Found	High	High	Peak Found	Peak Found	Peak Found	Peak Found	Peak Found	Peak Found	Peak Found	Peak Found	High	High	High	High
O15439-1	multidrug resistance-associated protein 4 [OS=Homo sapiens]	71.27	15	50	13	High	High	High	Peak Found	Peak Found	Not Found	High	High	High	High	High	Peak Found	High	High	Peak Found	Peak Found	Peak Found	Peak Found	Peak Found	Peak Found	High	High	High	High	High	High
O15460-2	Isoform IIa of Prolyl 4-hydroxylase subunit alpha-2 [OS=Homo sapiens]	286.529	58	727	25	High	High	High	High	High	High	High	High	High	High	High	High	High	High	High	High	High	High	High	High	High	High	High	High	High	High
O15484	calpain-5 [OS=Homo sapiens]	5.754	3	3	1	Not Found	Not Found	Not Found	Not Found	Not Found	Not Found	High	Peak Found	Peak Found	Not Found	Not Found	High	High	Peak Found	Not Found	Peak Found	Peak Found	Not Found	Peak Found	Peak Found	Not Found	Not Found	Not Found	Peak Found	Not Found	Peak Found
O15498	Synaptobrevin homolog YKT6 [OS=Homo sapiens]	43.065	44	79	7	High	Peak Found	Peak Found	High	Peak Found	High	High	High	High	High	High	High	High	High	High	High	High	High	High	High	High	High	High	High	High	High
O15511-1	Actin-related protein 2/3 complex subunit 5 [OS=Homo sapiens]	169.521	67	327	7	High	High	High	High	High	High	High	High	High	High	High	High	High	High	High	High	High	High	High	High	High	High	High	High	High	High
O15523	atp-dependent rna helicase ddx3y [OS=Homo sapiens]	200.323	47	684	3	High	Not Found	Not Found	Not Found	Not Found	Not Found	Peak Found	Peak Found	Peak Found	Peak Found	Peak Found	Not Found	Peak Found	Peak Found	Peak Found	High	High	Peak Found	Peak Found	Peak Found	Peak Found	Peak Found	High	Not Found	Not Found	Not Found
O15533-1	Tapasin [OS=Homo sapiens]	17.739	16	21	3	Peak Found	High	High	Not Found	Not Found	Peak Found	High	Peak Found	High	High	High	High	Peak Found	Peak Found	High	High	High	High	High	High	High	High	High	High	Peak Found	High
O43143	Pre-mRNA-splicing factor ATP-dependent RNA helicase DHX15 [OS=Homo sapiens]	116.87	33	156	18	High	High	High	Peak Found	Peak Found	Peak Found	High	High	High	High	High	High	High	High	High	High	High	High	High	High	High	High	High	High	High	High
O43149	Zinc finger ZZ-type and EF-hand domain-containing protein 1 [OS=Homo sapiens]	5.005	1	3	2	Peak Found	Peak Found	High	Not Found	Not Found	Not Found	Not Found	Not Found	Peak Found	Not Found	Not Found	Not Found	High	High	Peak Found	Peak Found	Peak Found	Not Found	Not Found	Not Found	Peak Found	Peak Found	Peak Found	Not Found	Not Found	Not Found
O43150-1	Arf-GAP with SH3 domain, ANK repeat and PH domain-containing protein 2 [OS=Homo sapiens]	28.972	8	34	4	High	High	High	Peak Found	Peak Found	Peak Found	Peak Found	High	High	High	High	High	High	High	High	High	High	High	High	High	High	High	High	High	Peak Found	High	Met-loss [N-Term]
O43159	ribosomal rna-processing protein 8 [OS=Homo sapiens]	11.141	7	5	2	High	High	Not Found	Not Found	Not Found	Not Found	Not Found	Not Found	Not Found	Not Found	Not Found	Not Found	Not Found	Not Found	Not Found	Not Found	Not Found	Not Found	Not Found	Not Found	High	Not Found	High	Not Found	High	Not Found
O43166-1	Signal-induced proliferation-associated 1-like protein 1 [OS=Homo sapiens]	19.935	4	11	3	Not Found	Not Found	Not Found	Not Found	Not Found	Not Found	Peak Found	Peak Found	Peak Found	Peak Found	Peak Found	High	Peak Found	Peak Found	High	High	High	Peak Found	High	High	High	High	High	High	Peak Found	Peak Found
O43169	Cytochrome b5 type B [OS=Homo sapiens]	93.787	51	91	4	High	High	High	High	High	Peak Found	High	High	High	High	High	High	High	High	High	High	High	High	High	High	High	High	High	High	High	High
O43172-1	U4/U6 small nuclear ribonucleoprotein Prp4 [OS=Homo sapiens]	54.012	31	83	10	High	High	High	High	High	High	High	High	High	High	High	High	High	High	High	High	High	High	High	High	High	High	High	Peak Found	Peak Found	Peak Found	Acetyl [K109]
O43175	D-3-phosphoglycerate dehydrogenase [OS=Homo sapiens]	341.229	63	684	26	High	High	High	High	High	High	High	High	High	High	High	High	High	High	High	High	High	High	High	High	High	High	High	High	High	High
O43181	NADH dehydrogenase [ubiquinone] iron-sulfur protein 4, mitochondrial [OS=Homo sapiens]	16.853	29	16	3	High	Peak Found	Peak Found	Peak Found	High	High	High	High	Peak Found	Peak Found	Peak Found	Peak Found	Peak Found	Peak Found	High	Peak Found	Peak Found	High	High	High	High	Peak Found	Peak Found	Peak Found	Peak Found	High
O43237	Cytoplasmic dynein 1 light intermediate chain 2 [OS=Homo sapiens]	149.694	44	266	15	High	High	High	High	High	High	High	High	High	High	High	High	High	High	High	High	High	High	High	High	High	High	High	High	High	High
O43242	26S proteasome non-ATPase regulatory subunit 3 [OS=Homo sapiens]	149.551	49	349	20	High	High	High	High	High	High	High	High	High	High	High	High	High	High	High	High	High	High	High	High	High	High	High	High	High	High
O43251-8	Isoform 8 of RNA binding protein fox-1 homolog 2 [OS=Homo sapiens]	41.174	28	64	7	Peak Found	Peak Found	Peak Found	Peak Found	Peak Found	Peak Found	High	High	High	High	High	High	High	High	High	High	High	High	High	High	High	High	High	Peak Found	Peak Found	High
O43252	bifunctional 3'-phosphoadenosine 5'-phosphosulfate synthase 1 [OS=Homo sapiens]	101.663	33	160	11	High	High	High	Not Found	Not Found	Peak Found	High	High	High	High	High	High	High	High	High	High	High	High	High	High	High	High	High	High	High	High
O43264	Centromere/kinetochore protein zw10 homolog [OS=Homo sapiens]	33.414	11	38	5	High	Peak Found	Peak Found	Not Found	Not Found	Not Found	Peak Found	High	High	High	High	High	High	High	High	High	High	High	High	High	High	High	High	High	High	Peak Found	Met-loss+Acetyl [N-Term]
O43290	U4/U6.U5 tri-snRNP-associated protein 1 [OS=Homo sapiens]	40.426	15	55	8	High	High	High	Peak Found	Peak Found	Peak Found	High	High	High	High	High	Peak Found	High	High	High	High	High	High	High	High	High	High	High	Not Found	Peak Found	Not Found
O43293-1	Death-associated protein kinase 3 [OS=Homo sapiens]	45.064	23	19	6	Peak Found	High	Peak Found	Peak Found	Not Found	Not Found	High	High	High	Peak Found	Peak Found	Peak Found	Peak Found	Peak Found	Not Found	Peak Found	Peak Found	Peak Found	Peak Found	Peak Found	High	High	Peak Found	Peak Found	Peak Found	Peak Found
O43294-1	Transforming growth factor beta-1-induced transcript 1 protein [OS=Homo sapiens]	144.002	37	247	9	High	High	High	High	High	High	High	High	High	High	High	High	High	High	High	High	High	High	High	High	High	High	High	High	High	High	Acetyl [N-Term]
O43301	Heat shock 70 kDa protein 12A [OS=Homo sapiens]	13.011	6	22	3	Not Found	Not Found	Not Found	Not Found	Not Found	Not Found	High	High	High	High	High	Not Found	Peak Found	High	High	High	High	High	High	High	Not Found	High	High	Not Found	Not Found	Not Found
O43310	CBP80/20-dependent translation initiation factor [OS=Homo sapiens]	11.287	3	8	1	Not Found	Not Found	Not Found	Not Found	Not Found	Not Found	High	High	High	High	High	Peak Found	High	Peak Found	Peak Found	Not Found	High	High	Peak Found	Peak Found	Peak Found	Not Found	Not Found	Peak Found	Peak Found	Peak Found
O43314-1	inositol hexakisphosphate and diphosphoinositol-pentakisphosphate kinase 2 [OS=Homo sapiens]	7.155	2	6	1	Peak Found	Peak Found	Peak Found	Not Found	Not Found	Not Found	Peak Found	Peak Found	Peak Found	Peak Found	Peak Found	Peak Found	High	Peak Found	Peak Found	Peak Found	High	High	High	High	Peak Found	Peak Found	Peak Found	Peak Found	Peak Found	High
O43318	mitogen-activated protein kinase kinase kinase 7 [OS=Homo sapiens]	4.276	2	9	1	High	High	Peak Found	Not Found	Not Found	Not Found	Peak Found	Peak Found	High	Peak Found	High	Peak Found	Peak Found	Not Found	Peak Found	High	High	Peak Found	High	High	Peak Found	Peak Found	Peak Found	Peak Found	Not Found	Peak Found
O43324-1	Eukaryotic translation elongation factor 1 epsilon-1 [OS=Homo sapiens]	24.45	27	67	3	Peak Found	Peak Found	Peak Found	Not Found	Peak Found	Peak Found	High	High	High	High	High	High	High	High	High	High	High	High	High	High	High	High	High	High	High	High	Met-loss+Acetyl [N-Term]
O43353-1	Receptor-interacting serine/threonine-protein kinase 2 [OS=Homo sapiens]	12.122	9	4	3	Peak Found	Peak Found	Peak Found	Peak Found	Peak Found	Peak Found	Peak Found	Peak Found	Peak Found	High	Peak Found	Peak Found	Peak Found	Peak Found	Peak Found	Peak Found	Peak Found	Peak Found	High	High	Peak Found	Peak Found	Peak Found	Peak Found	Peak Found	Peak Found	Carbamyl [K538]
O43390-1	heterogeneous nuclear ribonucleoprotein r [OS=Homo sapiens]	199.676	53	623	20	High	High	High	High	High	High	High	High	High	High	High	High	High	High	High	High	High	High	High	High	High	High	High	High	High	High	Met-loss+Acetyl [N-Term]
O43395	U4/U6 small nuclear ribonucleoprotein Prp3 [OS=Homo sapiens]	3.95	5	3	2	Peak Found	High	High	Not Found	Not Found	Peak Found	Peak Found	Peak Found	Peak Found	High	Not Found	Peak Found	Peak Found	Not Found	Peak Found	Peak Found	Peak Found	Not Found	Peak Found	Peak Found	Peak Found	Peak Found	Peak Found	Not Found	Peak Found	Peak Found
O43396	Thioredoxin-like protein 1 [OS=Homo sapiens]	201.991	87	442	18	High	High	High	High	High	High	High	High	High	High	High	High	High	High	High	High	High	High	High	High	High	High	High	High	High	High	Met-loss [N-Term]
O43399	Tumor protein D54 [OS=Homo sapiens]	181.53	76	527	19	High	High	High	High	High	High	High	High	High	High	High	High	High	High	High	High	High	High	High	High	High	High	High	High	High	High	Acetyl [N-Term]
O43402	ER membrane protein complex subunit 8 [OS=Homo sapiens]	11.106	16	11	3	High	Peak Found	Peak Found	Peak Found	Peak Found	High	High	High	Peak Found	Peak Found	Peak Found	High	Peak Found	Peak Found	Peak Found	Peak Found	Peak Found	Peak Found	High	High	Peak Found	Peak Found	Peak Found	Not Found	High	Peak Found
O43432	Eukaryotic translation initiation factor 4 gamma 3 [OS=Homo sapiens]	68.826	11	116	9	High	Peak Found	High	Not Found	Not Found	Peak Found	High	High	High	High	High	High	High	High	High	High	High	High	High	Peak Found	High	High	High	High	High	High
O43447	peptidyl-prolyl cis-trans isomerase H [OS=Homo sapiens]	66.193	69	102	7	High	High	High	High	High	High	High	High	High	High	High	High	High	High	High	High	High	High	High	High	High	High	High	High	High	High	Met-loss+Acetyl [N-Term]
O43464	Serine protease HTRA2, mitochondrial [OS=Homo sapiens]	23.3	13	16	2	Peak Found	Peak Found	Peak Found	Peak Found	Peak Found	High	High	Peak Found	High	Peak Found	High	Peak Found	Peak Found	Peak Found	Peak Found	High	High	High	High	High	Peak Found	High	High	High	High	High
O43488	aflatoxin B1 aldehyde reductase member 2 [OS=Homo sapiens]	124.238	51	153	11	High	High	High	High	High	High	High	High	High	High	High	High	High	High	High	High	High	High	High	High	High	High	High	High	High	High
O43491-1	band 4.1-like protein 2 [OS=Homo sapiens]	332.575	61	489	11	High	High	High	Peak Found	Peak Found	Peak Found	High	High	High	High	High	High	High	High	High	High	High	High	High	High	High	High	High	Peak Found	Peak Found	Peak Found	Met-loss+Acetyl [N-Term]
O43493-1	Trans-Golgi network integral membrane protein 2 [OS=Homo sapiens]	56.018	22	136	8	High	High	High	High	High	High	High	High	High	High	High	High	High	High	High	High	High	High	High	High	High	High	High	High	High	High
O43504	Ragulator complex protein LAMTOR5 [OS=Homo sapiens]	56.684	64	23	3	Not Found	Not Found	Not Found	Not Found	Not Found	Not Found	Peak Found	High	High	High	High	Peak Found	Peak Found	Peak Found	High	High	High	High	High	High	High	Peak Found	High	Peak Found	Peak Found	Peak Found	Acetyl [N-Term]
O43548-1	Protein-glutamine gamma-glutamyltransferase 5 [OS=Homo sapiens]	5.195	3	2	2	Peak Found	Peak Found	High	Peak Found	Peak Found	Peak Found	Peak Found	Peak Found	High	Peak Found	Peak Found	Peak Found	Peak Found	Peak Found	Peak Found	Peak Found	Peak Found	Peak Found	Peak Found	Peak Found	Peak Found	Peak Found	Peak Found	Peak Found	Peak Found	Peak Found
O43583	density-regulated protein [OS=Homo sapiens]	79.739	38	123	7	High	High	High	High	High	High	High	High	High	High	High	High	High	High	High	High	High	High	High	High	High	High	High	High	High	High	Met-loss+Acetyl [N-Term]
O43592	Exportin-T [OS=Homo sapiens]	28.106	8	22	5	Peak Found	High	Peak Found	Not Found	Not Found	Not Found	High	High	High	High	High	High	High	High	High	High	High	High	Peak Found	Peak Found	Peak Found	Peak Found	Peak Found	Peak Found	Peak Found	Peak Found	Acetyl [N-Term]
O43598-1	2'-deoxynucleoside 5'-phosphate N-hydrolase 1 [OS=Homo sapiens]	66.87	57	64	5	High	Peak Found	High	High	Peak Found	High	High	High	High	High	High	High	High	High	High	High	High	High	High	High	High	High	High	Peak Found	High	Peak Found
O43615	Mitochondrial import inner membrane translocase subunit TIM44 [OS=Homo sapiens]	26.562	13	57	5	Not Found	Not Found	High	Not Found	Not Found	Not Found	High	High	High	High	High	High	High	High	High	High	High	High	High	High	High	High	High	High	High	High
O43617-1	Trafficking protein particle complex subunit 3 [OS=Homo sapiens]	5.906	13	17	2	Peak Found	Peak Found	High	Not Found	Not Found	Not Found	High	High	High	High	High	Peak Found	High	High	High	High	High	Peak Found	Peak Found	Peak Found	High	High	High	Peak Found	Peak Found	Peak Found
O43633	charged multivesicular body protein 2a [OS=Homo sapiens]	14.998	20	37	5	Peak Found	Peak Found	High	Peak Found	High	High	High	High	High	High	High	High	High	High	High	High	High	High	High	Peak Found	High	High	High	Peak Found	High	Peak Found	Acetyl [N-Term]
O43660-1	Pleiotropic regulator 1 [OS=Homo sapiens]	39.661	22	34	5	Not Found	Peak Found	Peak Found	Not Found	Peak Found	Not Found	High	High	High	High	High	High	High	Peak Found	High	High	High	High	Peak Found	High	High	High	High	Not Found	Not Found	Not Found
O43665-3	Isoform 3 of Regulator of G-protein signaling 10 [OS=Homo sapiens]	63.274	60	59	9	High	High	High	High	High	High	High	High	High	High	High	Peak Found	High	High	Peak Found	Peak Found	Peak Found	High	High	High	High	High	High	Peak Found	Peak Found	Peak Found
O43670-1	BUB3-interacting and GLEBS motif-containing protein ZNF207 [OS=Homo sapiens]	32.805	15	86	7	High	High	High	Peak Found	High	High	High	High	High	High	High	High	High	High	High	High	High	High	High	High	High	High	High	Peak Found	Peak Found	Peak Found
O43676	NADH dehydrogenase [ubiquinone] 1 beta subcomplex subunit 3 [OS=Homo sapiens]	4.169	11	4	1	High	High	High	Not Found	Not Found	Not Found	Peak Found	Peak Found	Peak Found	Peak Found	Peak Found	Peak Found	Peak Found	Peak Found	Peak Found	Peak Found	Peak Found	Peak Found	Peak Found	Peak Found	Peak Found	Peak Found	Peak Found	Peak Found	Peak Found	Peak Found
O43678	NADH dehydrogenase [ubiquinone] 1 alpha subcomplex subunit 2 [OS=Homo sapiens]	8.774	21	6	1	Not Found	Not Found	Not Found	Not Found	Not Found	Not Found	High	Not Found	Not Found	Not Found	Not Found	High	Not Found	Not Found	Not Found	Peak Found	High	High	Not Found	Not Found	High	High	Peak Found	Not Found	Not Found	Not Found
O43681	ATPase ASNA1 [OS=Homo sapiens]	71.158	58	167	11	High	High	High	Peak Found	Not Found	Not Found	High	High	High	High	High	High	High	High	High	High	High	High	High	High	High	High	High	High	High	High	Met-loss+Acetyl [N-Term]
O43684	Mitotic checkpoint protein BUB3 [OS=Homo sapiens]	109.969	57	268	11	High	High	High	High	High	High	High	High	High	High	High	High	High	High	High	High	High	High	High	High	High	High	High	High	High	High
O43707	Alpha-actinin-4 [OS=Homo sapiens]	1735.91	84	6024	57	High	High	High	High	High	High	High	High	High	High	High	High	High	High	High	High	High	High	High	High	High	High	High	High	High	High	Carbamyl [K54; K66; K217; K455]; Met-loss+Acetyl [N-Term]; Acetyl [K701]
O43719	HIV Tat-specific factor 1 [OS=Homo sapiens]	19.108	5	4	2	Not Found	Not Found	High	Not Found	Not Found	Not Found	Peak Found	High	Not Found	Peak Found	Not Found	Peak Found	Peak Found	Peak Found	Peak Found	Not Found	Peak Found	High	Peak Found	Peak Found	Not Found	Not Found	Not Found	Not Found	Not Found	Not Found
O43747-1	AP-1 complex subunit gamma-1 [OS=Homo sapiens]	100.302	22	203	12	High	High	High	High	Peak Found	High	High	High	High	High	High	High	High	High	High	High	High	High	High	High	High	High	High	High	High	High
O43752	Syntaxin-6 [OS=Homo sapiens]	18.313	10	21	1	Not Found	Not Found	Not Found	Not Found	Not Found	Not Found	High	High	High	High	High	High	High	High	High	High	High	Not Found	Peak Found	Peak Found	Not Found	Not Found	Not Found	High	High	High
O43759-1	Synaptogyrin-1 [OS=Homo sapiens]	5.798	5	3	1	Not Found	Not Found	Not Found	Not Found	Not Found	Not Found	Peak Found	Peak Found	Not Found	Not Found	Peak Found	Peak Found	Not Found	Peak Found	Peak Found	Peak Found	Peak Found	Not Found	Not Found	Not Found	High	High	High	Peak Found	Peak Found	Peak Found
O43765	Small glutamine-rich tetratricopeptide repeat-containing protein alpha [OS=Homo sapiens]	61.735	38	157	11	High	High	High	High	High	High	High	High	High	High	High	High	High	High	High	High	High	High	High	High	High	High	High	High	High	High
O43768	alpha-endosulfine [OS=Homo sapiens]	49.638	43	92	3	High	High	High	Not Found	Not Found	Not Found	High	High	High	High	High	High	High	High	High	High	High	High	High	High	High	High	High	High	Peak Found	High	Met-loss+Acetyl [N-Term]; Carbamyl [K4]; Met-loss [N-Term]
O43772	mitochondrial carnitine/acylcarnitine carrier protein [OS=Homo sapiens]	9.847	8	20	2	High	Not Found	High	Not Found	Not Found	Not Found	High	High	Peak Found	Peak Found	High	High	High	High	High	High	Peak Found	Not Found	Peak Found	Peak Found	Peak Found	Peak Found	Peak Found	High	High	High
O43776	Asparagine--tRNA ligase, cytoplasmic [OS=Homo sapiens]	169.466	39	403	23	High	High	High	High	High	High	High	High	High	High	High	High	High	High	High	High	High	High	High	High	High	High	High	High	High	High	Met-loss [N-Term]
O43795	Unconventional myosin-Ib [OS=Homo sapiens]	320.101	43	553	34	High	High	High	Peak Found	Peak Found	Peak Found	High	High	High	High	High	High	High	High	High	High	High	High	High	High	High	High	High	High	High	High
O43809	Cleavage and polyadenylation specificity factor subunit 5 [OS=Homo sapiens]	82.458	55	162	9	High	High	High	Peak Found	Peak Found	Peak Found	High	High	High	High	High	High	High	High	High	High	High	High	High	High	High	High	High	High	Peak Found	Peak Found
O43813	LanC-like protein 1 [OS=Homo sapiens]	30.776	17	27	4	Peak Found	Peak Found	Peak Found	Not Found	Not Found	Not Found	High	High	Peak Found	Peak Found	Peak Found	High	High	High	High	High	High	High	High	High	High	High	Peak Found	Peak Found	Peak Found	Not Found
O43815	striatin [OS=Homo sapiens]	31.577	16	14	7	Peak Found	Peak Found	Peak Found	Not Found	Not Found	Not Found	Peak Found	High	Peak Found	Peak Found	Peak Found	Peak Found	Peak Found	Peak Found	High	High	High	High	High	High	High	Peak Found	Peak Found	Peak Found	Peak Found	Peak Found
O43818	U3 small nucleolar RNA-interacting protein 2 [OS=Homo sapiens]	35.605	19	25	4	High	High	High	Peak Found	Peak Found	Not Found	High	High	High	High	High	High	High	High	High	High	High	Peak Found	Peak Found	Peak Found	High	High	High	High	High	Not Found
O43819	Protein SCO2 homolog, mitochondrial [OS=Homo sapiens]	6.186	11	2	1	Not Found	Not Found	Not Found	Not Found	Not Found	Not Found	Peak Found	Not Found	Not Found	Peak Found	Peak Found	Peak Found	Not Found	Peak Found	Not Found	Not Found	Peak Found	Not Found	Not Found	Peak Found	Not Found	Not Found	Not Found	Peak Found	High	High
O43823	A-kinase anchor protein 8 [OS=Homo sapiens]	16.577	6	4	2	High	High	Peak Found	Not Found	Not Found	Not Found	Peak Found	Peak Found	Peak Found	Peak Found	High	Not Found	Peak Found	Peak Found	Not Found	Not Found	Not Found	Not Found	Peak Found	High	Peak Found	Peak Found	Peak Found	Not Found	Not Found	Not Found
O43837-1	isocitrate dehydrogenase [NAD] subunit beta, mitochondrial [OS=Homo sapiens]	45.155	37	64	8	High	Peak Found	High	Peak Found	Peak Found	Peak Found	High	High	High	High	High	High	High	High	High	High	High	High	High	High	High	High	High	High	High	High
O43847-1	Nardilysin [OS=Homo sapiens]	93.236	14	142	13	High	High	High	High	High	High	High	High	High	High	High	High	High	High	High	High	High	High	High	High	High	High	High	High	High	High
O43852	Calumenin [OS=Homo sapiens]	825.881	75	2139	5	High	High	High	Peak Found	Peak Found	Peak Found	High	High	High	High	High	High	High	High	High	High	High	High	High	High	High	High	High	High	High	High	Carbamyl [K84; K251; K287; K293]; Acetyl [K293]
O43852-4	Isoform 4 of Calumenin [OS=Homo sapiens]	831.566	76	2072	4	High	High	High	Not Found	Peak Found	Peak Found	High	High	High	High	High	High	High	High	High	High	High	High	High	High	High	High	High	High	High	High	Acetyl [K301]; Carbamyl [K259; K295; K301]
O43854-1	EGF-like repeat and discoidin I-like domain-containing protein 3 [OS=Homo sapiens]	5.577	9	2	2	Not Found	Not Found	Not Found	Not Found	Not Found	Not Found	Not Found	Not Found	Not Found	Not Found	Not Found	Not Found	Peak Found	Not Found	Not Found	High	Not Found	Not Found	Not Found	Peak Found	Peak Found	Peak Found	High	Not Found	Peak Found	Peak Found
O43865	S-adenosylhomocysteine hydrolase-like protein 1 [OS=Homo sapiens]	103.198	41	125	16	High	High	High	High	Peak Found	Peak Found	High	High	High	High	High	High	High	High	High	High	High	High	High	High	High	High	High	High	High	High	Met-loss+Acetyl [N-Term]
O43896	Kinesin-like protein KIF1C [OS=Homo sapiens]	5.1	2	15	2	Peak Found	Peak Found	Peak Found	Not Found	Not Found	Not Found	High	High	High	Peak Found	Peak Found	High	Peak Found	High	High	High	High	High	High	High	Peak Found	Peak Found	Peak Found	High	High	High
O43920	NADH dehydrogenase [ubiquinone] iron-sulfur protein 5 [OS=Homo sapiens]	8.57	21	13	2	Peak Found	Peak Found	Peak Found	Not Found	Not Found	Not Found	Peak Found	High	Peak Found	Peak Found	Peak Found	High	High	High	High	High	Peak Found	Peak Found	High	Peak Found	High	High	Peak Found	High	High	Peak Found
O43924	Retinal rod rhodopsin-sensitive cGMP 3',5'-cyclic phosphodiesterase subunit delta [OS=Homo sapiens]	15.731	21	10	2	Not Found	Peak Found	High	Not Found	Not Found	Not Found	High	Peak Found	Peak Found	Peak Found	Peak Found	Not Found	High	Peak Found	Peak Found	Peak Found	Peak Found	High	High	High	Peak Found	Not Found	Not Found	Not Found	Not Found	Not Found
O60216	Double-strand-break repair protein rad21 homolog [OS=Homo sapiens]	18.458	7	6	2	High	High	High	Not Found	Not Found	Not Found	Peak Found	Peak Found	Not Found	Peak Found	High	Peak Found	Peak Found	Peak Found	Peak Found	Peak Found	Peak Found	High	Peak Found	High	Peak Found	Peak Found	Peak Found	Not Found	Not Found	Not Found
O60237	Protein phosphatase 1 regulatory subunit 12b [OS=Homo sapiens]	6.839	2	7	1	Not Found	Peak Found	High	Not Found	Not Found	Not Found	Not Found	Not Found	Not Found	Not Found	Not Found	Not Found	Not Found	Peak Found	Not Found	Not Found	Peak Found	Not Found	Not Found	Peak Found	Not Found	Not Found	Peak Found	Not Found	Not Found	Not Found
O60264	SWI/SNF-related matrix-associated actin-dependent regulator of chromatin subfamily A member 5 [OS=Homo sapiens]	26.51	7	10	5	Peak Found	High	Peak Found	Peak Found	Not Found	Not Found	Peak Found	High	High	High	High	Not Found	Peak Found	Not Found	Peak Found	Peak Found	Peak Found	Not Found	Peak Found	Peak Found	Not Found	Peak Found	Not Found	Not Found	Not Found	Not Found
O60271-2	Isoform 2 of C-Jun-amino-terminal kinase-interacting protein 4 [OS=Homo sapiens]	132.516	21	215	16	High	High	High	Peak Found	Peak Found	Peak Found	High	High	High	High	High	High	High	High	High	High	High	High	High	High	High	High	High	High	High	High	Acetyl [N-Term]
O60313	Dynamin-like 120 kDa protein, mitochondrial [OS=Homo sapiens]	79.741	24	56	14	High	High	High	High	Peak Found	Peak Found	High	High	High	High	High	High	High	High	High	High	High	Peak Found	High	Peak Found	Peak Found	High	Peak Found	High	High	High
O60437	periplakin [OS=Homo sapiens]	5.866	1	1	1	Not Found	Not Found	Not Found	Not Found	Not Found	Not Found	Not Found	Not Found	Not Found	Not Found	Not Found	Not Found	Not Found	Not Found	Not Found	High	Not Found	Not Found	Not Found	Not Found	Not Found	Not Found	Not Found	Not Found	Not Found	Not Found
O60443	Non-syndromic hearing impairment protein 5 [OS=Homo sapiens]	32.72	21	30	5	Not Found	Not Found	Not Found	Not Found	Not Found	Not Found	High	High	Peak Found	High	High	High	High	High	High	High	High	Peak Found	High	High	High	High	Peak Found	High	Peak Found	Peak Found
O60476	mannosyl-oligosaccharide 1,2-alpha-mannosidase IB [OS=Homo sapiens]	6.913	3	4	1	Not Found	Not Found	Not Found	Not Found	Not Found	Not Found	Peak Found	Peak Found	Peak Found	High	Peak Found	Peak Found	Peak Found	Peak Found	Peak Found	Peak Found	Peak Found	Peak Found	Not Found	Peak Found	Not Found	Not Found	Peak Found	High	High	High
O60493-1	sorting nexin-3 [OS=Homo sapiens]	92.629	70	259	11	High	High	High	High	High	High	High	High	High	High	High	High	High	High	High	High	High	High	High	High	High	High	High	High	High	High	Met-loss+Acetyl [N-Term]
O60502	protein O-GlcNAcase [OS=Homo sapiens]	40.853	10	32	6	High	High	Peak Found	Not Found	High	Not Found	High	High	High	High	High	High	High	High	High	High	High	Peak Found	Peak Found	High	Peak Found	Peak Found	Peak Found	High	High	High
O60504-2	Isoform Beta of Vinexin [OS=Homo sapiens]	42.284	48	58	9	High	High	High	Not Found	Not Found	Not Found	High	High	High	High	High	High	High	High	High	High	High	High	High	High	High	High	High	High	High	High	Met-loss+Acetyl [N-Term]
O60506	Heterogeneous nuclear ribonucleoprotein Q [OS=Homo sapiens]	335.096	63	991	25	High	High	High	High	High	High	High	High	High	High	High	High	High	High	High	High	High	High	High	High	High	High	High	High	High	High	Met-loss+Acetyl [N-Term]
O60518	ran-binding protein 6 [OS=Homo sapiens]	48.282	6	83	2	Not Found	Not Found	Not Found	Not Found	Not Found	Not Found	High	High	High	High	High	High	High	High	High	High	High	High	High	High	High	High	Peak Found	High	High	Peak Found
O60524	nuclear export mediator factor NEMF [OS=Homo sapiens]	22.946	4	21	2	High	Peak Found	High	Not Found	Not Found	Not Found	Peak Found	High	High	High	High	Not Found	Not Found	Peak Found	High	High	High	Not Found	Not Found	Not Found	High	High	Peak Found	High	High	High
O60551	Glycylpeptide N-tetradecanoyltransferase 2 [OS=Homo sapiens]	26.532	12	47	2	Not Found	Not Found	Not Found	Not Found	Not Found	Not Found	Peak Found	Peak Found	High	Peak Found	Peak Found	Peak Found	High	High	Peak Found	Peak Found	Not Found	Peak Found	Peak Found	Peak Found	Not Found	Peak Found	Peak Found	Not Found	Not Found	Peak Found
O60565	Gremlin-1 [OS=Homo sapiens]	55.096	63	89	9	Peak Found	Peak Found	Peak Found	Peak Found	Peak Found	Peak Found	High	High	High	High	High	High	High	High	High	High	High	High	Peak Found	High	High	High	High	High	High	High
O60568	Procollagen-lysine,2-oxoglutarate 5-dioxygenase 3 [OS=Homo sapiens]	226.831	48	462	26	High	High	High	High	High	High	High	High	High	High	High	High	High	High	High	High	High	High	High	High	High	High	High	High	High	High
O60573	eukaryotic translation initiation factor 4E type 2 [OS=Homo sapiens]	9.357	17	5	2	Not Found	Peak Found	Peak Found	Not Found	Not Found	Not Found	Peak Found	High	Peak Found	High	High	Peak Found	Peak Found	Peak Found	Peak Found	Peak Found	High	Not Found	Peak Found	Peak Found	Peak Found	Peak Found	Peak Found	Peak Found	Peak Found	Peak Found	Acetyl [N-Term]
O60610-1	Protein diaphanous homolog 1 [OS=Homo sapiens]	102.793	26	120	20	High	High	High	High	Peak Found	Peak Found	High	High	High	High	High	High	High	High	High	High	High	Peak Found	Peak Found	High	High	High	High	High	High	High
O60613-1	selenoprotein F [OS=Homo sapiens]	41.512	53	66	6	High	High	High	Peak Found	Peak Found	Not Found	High	High	Peak Found	High	Peak Found	High	High	High	High	High	High	High	High	High	Peak Found	High	High	High	High	High
O60645	exocyst complex component 3 [OS=Homo sapiens]	12.14	4	11	2	Not Found	Not Found	Not Found	Not Found	Not Found	Not Found	High	High	Peak Found	High	Peak Found	High	High	High	Peak Found	Peak Found	High	Not Found	Peak Found	Peak Found	High	High	Peak Found	Peak Found	Peak Found	Peak Found
O60664-1	Perilipin-3 [OS=Homo sapiens]	776.363	84	1788	29	High	High	High	High	High	High	High	High	High	High	High	High	High	High	High	High	High	High	High	High	High	High	High	High	High	High	Met-loss+Acetyl [N-Term]
O60684	Importin subunit alpha-7 [OS=Homo sapiens]	129.978	60	218	12	High	High	High	Not Found	Peak Found	Peak Found	High	High	High	High	High	High	High	High	High	High	High	High	High	High	High	High	High	High	High	High	Acetyl [N-Term]
O60701	UDP-glucose 6-dehydrogenase [OS=Homo sapiens]	507.331	82	1199	35	High	High	High	High	High	High	High	High	High	High	High	High	High	High	High	High	High	High	High	High	High	High	High	High	High	High	Acetyl [K149]
O60716-3	Isoform 1AC of Catenin delta-1 [OS=Homo sapiens]	258.879	50	405	31	High	High	High	High	High	High	High	High	High	High	High	High	High	High	High	High	High	High	High	High	High	High	High	High	High	High
O60739	eukaryotic translation initiation factor 1b [OS=Homo sapiens]	58.055	65	114	1	Not Found	Not Found	High	Not Found	Not Found	Not Found	High	Peak Found	High	High	High	High	High	Peak Found	High	High	High	High	High	High	High	High	High	Peak Found	Peak Found	Peak Found	Met-loss+Acetyl [N-Term]; Carbamyl [K18]; Met-loss [N-Term]
O60749	Sorting nexin-2 [OS=Homo sapiens]	41.469	16	85	7	High	High	High	High	High	Peak Found	High	High	High	High	High	High	High	High	High	High	High	High	High	High	High	High	High	High	High	High
O60762	Dolichol-phosphate mannosyltransferase subunit 1 [OS=Homo sapiens]	29.77	22	71	5	Not Found	Peak Found	Peak Found	Not Found	Not Found	Not Found	High	High	High	High	High	High	High	High	High	High	High	High	High	High	High	High	High	High	High	High
O60763-1	General vesicular transport factor p115 [OS=Homo sapiens]	370.838	57	609	36	High	High	High	High	High	High	High	High	High	High	High	High	High	High	High	High	High	High	High	High	High	High	High	High	High	High
O60783	28S ribosomal protein S14, mitochondrial [OS=Homo sapiens]	6.849	12	2	1	Not Found	Not Found	Not Found	Not Found	Not Found	Not Found	Not Found	Not Found	Not Found	Not Found	Not Found	Not Found	High	Not Found	Not Found	Not Found	Not Found	Not Found	Not Found	Not Found	Not Found	Not Found	Not Found	High	Not Found	Not Found
O60784	Target of Myb protein 1 [OS=Homo sapiens]	176.586	53	298	14	High	High	High	Peak Found	Not Found	Peak Found	High	High	High	High	High	High	High	High	High	High	High	High	High	High	High	High	High	High	High	High	Acetyl [N-Term]
O60812	Heterogeneous nuclear ribonucleoprotein C-like 1 [OS=Homo sapiens]	60.485	23	356	2	Peak Found	Peak Found	Peak Found	High	Peak Found	Peak Found	Peak Found	Peak Found	Peak Found	Peak Found	Peak Found	Not Found	Not Found	Not Found	Not Found	Peak Found	Peak Found	Not Found	Peak Found	Peak Found	High	Peak Found	Not Found	High	Not Found	Not Found	Carbamyl [K210]
O60826	Coiled-coil domain-containing protein 22 [OS=Homo sapiens]	10.993	6	13	3	Peak Found	Peak Found	Peak Found	Not Found	Not Found	Not Found	High	Peak Found	High	High	High	Peak Found	High	High	High	High	Peak Found	Peak Found	High	Peak Found	Peak Found	Peak Found	Not Found	High	High	Peak Found
O60828	Polyglutamine-binding protein 1 [OS=Homo sapiens]	22.246	33	25	4	Peak Found	Peak Found	Peak Found	High	Not Found	Not Found	Peak Found	High	High	High	Peak Found	High	High	Peak Found	Peak Found	High	High	High	High	High	High	High	Peak Found	Not Found	Not Found	Peak Found
O60831	PRA1 family protein 2 [OS=Homo sapiens]	13.645	22	50	3	High	High	High	Not Found	Not Found	Not Found	Peak Found	High	High	High	Peak Found	High	High	High	High	High	High	Peak Found	Peak Found	High	High	High	High	High	High	High
O60832-1	H/ACA ribonucleoprotein complex subunit 4 [OS=Homo sapiens]	41.247	22	61	8	High	High	High	High	High	High	High	High	High	High	High	High	High	High	High	High	High	Peak Found	Peak Found	Peak Found	High	High	High	High	Peak Found	High	Met-loss+Acetyl [N-Term]
O60841	Eukaryotic translation initiation factor 5B [OS=Homo sapiens]	166.489	32	303	23	High	High	High	Peak Found	Peak Found	Peak Found	High	High	High	High	High	High	High	High	High	High	High	High	High	High	High	High	High	High	High	High
O60869-1	Endothelial differentiation-related factor 1 [OS=Homo sapiens]	53.013	47	204	8	High	High	High	High	High	High	High	High	High	High	High	High	High	High	High	High	High	High	High	High	High	High	High	High	High	High	Met-loss+Acetyl [N-Term]
O60884	DnaJ homolog subfamily A member 2 [OS=Homo sapiens]	99.21	40	252	12	High	High	High	High	High	High	High	High	High	High	High	High	High	High	High	High	High	High	High	High	High	High	High	High	High	High
O60888-1	Protein CutA [OS=Homo sapiens]	71.91	41	122	5	High	High	Peak Found	High	High	Peak Found	High	High	High	High	High	High	High	High	High	High	High	High	High	High	High	High	High	High	High	High
O60890	Oligophrenin-1 [OS=Homo sapiens]	5.1	1	29	1	High	High	High	High	Peak Found	High	High	High	High	High	High	High	High	High	High	Peak Found	High	High	Peak Found	High	Peak Found	High	Peak Found	Peak Found	Peak Found	Peak Found
O60927	Protein phosphatase 1 regulatory subunit 11 [OS=Homo sapiens]	16.335	33	13	2	High	High	High	High	High	High	Peak Found	Peak Found	Peak Found	Peak Found	Peak Found	Not Found	Not Found	Peak Found	Peak Found	Peak Found	High	Peak Found	Peak Found	Peak Found	High	High	High	Not Found	Peak Found	Peak Found	Met-loss+Acetyl [N-Term]
O60936-3	Isoform 3 of Nucleolar protein 3 [OS=Homo sapiens]	26.19	24	19	3	Not Found	Not Found	Not Found	Not Found	Not Found	Not Found	High	High	High	High	Peak Found	High	Peak Found	Peak Found	High	High	High	High	High	High	High	High	High	Not Found	Not Found	Peak Found
O75027-1	ATP-binding cassette sub-family B member 7, mitochondrial [OS=Homo sapiens]	5.667	2	3	1	Not Found	Not Found	Not Found	Not Found	Not Found	Not Found	Peak Found	High	High	Peak Found	Peak Found	High	Peak Found	Peak Found	Peak Found	Peak Found	Peak Found	Peak Found	Not Found	Peak Found	Not Found	Not Found	Not Found	Peak Found	Not Found	Not Found
O75083	WD repeat-containing protein 1 [OS=Homo sapiens]	838.275	85	2099	37	High	High	High	High	High	High	High	High	High	High	High	High	High	High	High	High	High	High	High	High	High	High	High	High	High	High
O75116	Rho-associated protein kinase 2 [OS=Homo sapiens]	111.346	21	147	18	High	High	High	Peak Found	Peak Found	Peak Found	High	High	High	High	High	High	High	High	High	High	High	Peak Found	High	High	High	High	High	High	High	High
O75131	Copine-3 [OS=Homo sapiens]	168.391	53	336	19	High	High	High	Peak Found	Peak Found	Peak Found	High	High	High	High	High	High	High	High	High	High	High	High	High	High	High	High	High	High	High	High
O75147	Obscurin-like protein 1 [OS=Homo sapiens]	4.593	1	3	1	Peak Found	Peak Found	Peak Found	Peak Found	Peak Found	Peak Found	Peak Found	Not Found	Peak Found	Peak Found	Peak Found	Peak Found	High	Peak Found	Peak Found	High	Peak Found	High	Peak Found	Peak Found	Peak Found	Peak Found	Peak Found	Peak Found	Peak Found	Peak Found
O75153	Clustered mitochondria protein homolog [OS=Homo sapiens]	5.994	2	8	2	High	High	High	Peak Found	Peak Found	Not Found	High	Peak Found	Peak Found	Peak Found	High	Peak Found	Peak Found	Peak Found	High	Peak Found	Peak Found	Peak Found	Peak Found	High	Peak Found	High	Peak Found	Peak Found	Peak Found	Not Found
O75165	DnaJ homolog subfamily C member 13 [OS=Homo sapiens]	80.111	9	95	12	High	High	High	Peak Found	Not Found	Not Found	High	High	High	High	High	High	High	High	High	High	High	Peak Found	Peak Found	Peak Found	High	High	High	High	High	High
O75175	CCR4-NOT transcription complex subunit 3 [OS=Homo sapiens]	4.481	3	3	1	Not Found	Not Found	Not Found	Not Found	Not Found	Not Found	Peak Found	Peak Found	High	Not Found	Peak Found	Peak Found	Peak Found	High	Peak Found	Not Found	Peak Found	Peak Found	Peak Found	Peak Found	Not Found	Not Found	High	Not Found	Peak Found	Peak Found
O75179-1	Ankyrin repeat domain-containing protein 17 [OS=Homo sapiens]	17.609	2	13	3	Not Found	Not Found	Peak Found	Not Found	Not Found	Not Found	Peak Found	Peak Found	High	High	High	Peak Found	Peak Found	Peak Found	High	High	Peak Found	High	High	High	High	Peak Found	High	Peak Found	Peak Found	Peak Found
O75190	DnaJ homolog subfamily B member 6 [OS=Homo sapiens]	9.003	11	11	2	Not Found	Not Found	Not Found	Not Found	Not Found	Not Found	High	Peak Found	Peak Found	Peak Found	High	Peak Found	Not Found	High	High	Peak Found	High	High	High	Peak Found	Peak Found	Peak Found	Peak Found	High	High	High
O75208-1	Ubiquinone biosynthesis protein COQ9, mitochondrial [OS=Homo sapiens]	18.557	7	10	1	Not Found	Not Found	Not Found	Not Found	Not Found	Not Found	Peak Found	Peak Found	Peak Found	Not Found	High	Not Found	Not Found	Not Found	High	Not Found	Peak Found	High	High	High	High	Peak Found	High	Peak Found	Peak Found	High
O75223-1	gamma-glutamylcyclotransferase [OS=Homo sapiens]	39.182	48	63	5	Peak Found	High	High	Peak Found	Not Found	Not Found	High	High	High	High	High	High	High	High	High	High	High	High	High	High	High	High	High	High	High	Peak Found
O75251	NADH dehydrogenase [ubiquinone] iron-sulfur protein 7, mitochondrial [OS=Homo sapiens]	17.713	19	20	2	Peak Found	Not Found	Not Found	Not Found	Not Found	Not Found	High	High	High	High	High	Peak Found	High	Peak Found	High	Peak Found	High	High	High	High	Peak Found	Peak Found	High	Peak Found	Peak Found	Peak Found
O75306-1	NADH dehydrogenase [ubiquinone] iron-sulfur protein 2, mitochondrial [OS=Homo sapiens]	47.262	22	58	7	Not Found	Peak Found	High	Not Found	Peak Found	Not Found	High	High	High	High	High	Peak Found	High	High	High	High	High	High	High	High	High	High	High	High	High	High
O75312	Zinc finger protein ZPR1 [OS=Homo sapiens]	86.378	42	85	11	High	High	High	High	High	High	High	High	High	High	High	High	High	High	High	High	High	High	High	High	High	High	High	High	High	High
O75323-1	Protein NipSnap homolog 2 [OS=Homo sapiens]	8.778	15	4	3	Peak Found	Peak Found	Peak Found	Not Found	Not Found	Not Found	Peak Found	Peak Found	Peak Found	Peak Found	Peak Found	Peak Found	Peak Found	Peak Found	Peak Found	Not Found	Not Found	High	Peak Found	High	High	Peak Found	Peak Found	High	Not Found	Peak Found
O75330-1	Hyaluronan mediated motility receptor [OS=Homo sapiens]	5.889	4	17	2	Peak Found	Peak Found	Peak Found	Peak Found	Peak Found	Peak Found	Peak Found	High	High	High	Peak Found	High	High	High	Peak Found	High	High	Peak Found	Peak Found	Peak Found	Peak Found	Peak Found	High	Peak Found	High	High
O75340	programmed cell death protein 6 [OS=Homo sapiens]	66.65	73	113	8	High	High	High	High	High	High	High	High	High	High	High	High	High	High	High	High	High	High	High	High	High	High	High	High	High	High	Met-loss+Acetyl [N-Term]
O75347	Tubulin-specific chaperone A [OS=Homo sapiens]	73.276	54	277	10	High	High	High	High	High	High	High	High	High	High	High	High	High	High	High	High	High	High	High	High	High	High	High	High	High	High
O75348	V-type proton ATPase subunit G 1 [OS=Homo sapiens]	64.042	58	140	5	High	High	High	Peak Found	Peak Found	Peak Found	High	High	High	High	High	High	High	High	High	High	High	High	High	High	High	High	High	High	High	High	Met-loss+Acetyl [N-Term]
O75351	Vacuolar protein sorting-associated protein 4B [OS=Homo sapiens]	61.827	39	62	8	Peak Found	High	High	Peak Found	Peak Found	High	High	High	High	High	High	High	High	High	High	High	High	High	High	High	High	High	High	High	Peak Found	High
O75352	Mannose-P-dolichol utilization defect 1 protein [OS=Homo sapiens]	13.3	10	30	2	Peak Found	Not Found	Not Found	Not Found	Not Found	Not Found	High	High	High	High	High	High	High	High	High	High	High	Peak Found	Peak Found	Peak Found	High	High	High	High	High	High
O75367-2	Isoform 1 of Core histone macro-H2A.1 [OS=Homo sapiens]	124.848	49	211	9	High	High	High	High	High	High	High	High	High	High	High	High	High	High	High	High	High	High	High	High	High	High	High	High	High	High
O75368	SH3 domain-binding glutamic acid-rich-like protein [OS=Homo sapiens]	99.27	85	265	11	High	High	High	High	High	High	High	High	High	High	High	High	High	High	High	High	High	High	High	High	High	High	High	High	High	High
O75369-1	Filamin-B [OS=Homo sapiens]	1717.85	82	4499	132	High	High	High	High	High	High	High	High	High	High	High	High	High	High	High	High	High	High	High	High	High	High	High	High	High	High	Met-loss [N-Term]
O75379-1	Vesicle-associated membrane protein 4 [OS=Homo sapiens]	4.055	9	1	1	High	Peak Found	Peak Found	Not Found	Not Found	Not Found	Peak Found	Peak Found	Not Found	Not Found	Peak Found	Not Found	Not Found	Not Found	Not Found	Peak Found	Not Found	Not Found	Not Found	Not Found	Not Found	Not Found	Not Found	Not Found	Not Found	Not Found
O75380	NADH dehydrogenase [ubiquinone] iron-sulfur protein 6, mitochondrial [OS=Homo sapiens]	28.225	40	40	4	Peak Found	Peak Found	Peak Found	Peak Found	Peak Found	Peak Found	High	High	High	High	High	High	High	High	High	High	High	High	High	High	High	High	High	High	High	High
O75381-1	Peroxisomal membrane protein PEX14 [OS=Homo sapiens]	55.421	42	54	8	High	High	Peak Found	High	High	High	High	High	High	High	High	High	High	Peak Found	High	High	High	High	High	High	High	High	High	High	High	High	Met-loss+Acetyl [N-Term]
O75382-1	Tripartite motif-containing protein 3 [OS=Homo sapiens]	21.583	9	9	3	Not Found	Not Found	Not Found	Not Found	Not Found	Not Found	Peak Found	Not Found	Peak Found	Peak Found	High	Peak Found	Peak Found	Peak Found	Not Found	Peak Found	Not Found	Not Found	High	Peak Found	High	High	High	High	High	Not Found
O75390	citrate synthase, mitochondrial [OS=Homo sapiens]	193.661	58	481	20	High	High	High	High	High	High	High	High	High	High	High	High	High	High	High	High	High	High	High	High	High	High	High	High	High	High
O75396	Vesicle-trafficking protein SEC22b [OS=Homo sapiens]	92.069	52	350	10	High	High	High	High	High	High	High	High	High	High	High	High	High	High	High	High	High	High	High	High	High	High	High	High	High	High	Met-loss [N-Term]
O75400	pre-mRNA-processing factor 40 homolog A [OS=Homo sapiens]	52.015	13	90	9	High	High	High	High	High	High	High	High	High	High	High	High	High	High	High	High	High	High	High	High	High	High	High	High	High	High
O75410-1	Transforming acidic coiled-coil-containing protein 1 [OS=Homo sapiens]	19.27	11	25	5	High	High	High	Not Found	Not Found	Not Found	High	High	Peak Found	Peak Found	Peak Found	High	High	High	High	High	Peak Found	High	High	High	Peak Found	Peak Found	High	High	High	High	Met-loss+Acetyl [N-Term]
O75427	Leucine-rich repeat and calponin homology domain-containing protein 4 [OS=Homo sapiens]	4.638	2	2	1	Not Found	Not Found	Not Found	Not Found	Not Found	Not Found	Not Found	Not Found	Not Found	Not Found	Peak Found	Not Found	Not Found	Peak Found	Not Found	Peak Found	Not Found	Not Found	Not Found	Not Found	Peak Found	High	Not Found	Not Found	Not Found	Not Found
O75431	Metaxin-2 [OS=Homo sapiens]	25.427	28	27	4	Peak Found	Peak Found	Peak Found	Not Found	Not Found	Not Found	High	High	High	High	High	High	High	High	High	High	High	Peak Found	Peak Found	High	Peak Found	High	Peak Found	High	High	High	Met-loss+Acetyl [N-Term]
O75436-1	Vacuolar protein sorting-associated protein 26A [OS=Homo sapiens]	38.631	37	89	7	High	High	High	Not Found	Not Found	Not Found	High	High	High	High	High	High	High	High	High	High	High	High	High	High	High	High	High	High	High	High	Met-loss+Acetyl [N-Term]
O75439	mitochondrial-processing peptidase subunit beta [OS=Homo sapiens]	89.797	36	180	11	High	High	High	High	High	High	High	High	High	High	High	High	High	High	High	High	High	High	High	High	High	High	High	High	High	High
O75475-1	PC4 and SFRS1-interacting protein [OS=Homo sapiens]	38.45	19	38	6	Peak Found	Peak Found	Peak Found	High	High	High	High	High	High	High	High	Peak Found	Peak Found	Peak Found	High	High	High	High	High	High	High	High	High	Not Found	Not Found	Not Found
O75477	erlin-1 [OS=Homo sapiens]	86.993	46	237	11	High	High	High	Peak Found	Peak Found	Peak Found	High	High	High	High	High	High	High	High	High	High	High	High	High	High	High	High	High	High	High	High
O75489	NADH dehydrogenase [ubiquinone] iron-sulfur protein 3, mitochondrial [OS=Homo sapiens]	56.27	44	141	8	Peak Found	Peak Found	Peak Found	Peak Found	Peak Found	Peak Found	High	High	High	High	High	High	High	High	High	High	High	High	High	High	High	High	High	High	High	High
O75494-1	Serine/arginine-rich splicing factor 10 [OS=Homo sapiens]	26.102	19	61	5	High	High	High	Peak Found	Peak Found	Peak Found	High	High	High	High	High	High	High	High	High	High	High	High	High	High	High	High	High	High	Peak Found	High
O75521	Enoyl-CoA delta isomerase 2, mitochondrial [OS=Homo sapiens]	96.128	41	185	14	High	High	High	High	High	High	High	High	High	High	High	High	High	High	High	High	High	High	High	High	High	High	High	High	High	High
O75525-1	KH domain-containing, RNA-binding, signal transduction-associated protein 3 [OS=Homo sapiens]	5.506	6	4	1	Not Found	Not Found	Not Found	Not Found	Not Found	Not Found	Not Found	Not Found	Peak Found	High	High	Not Found	Not Found	Not Found	Not Found	High	Not Found	Peak Found	High	Not Found	Not Found	Not Found	Not Found	Not Found	Not Found	Not Found
O75531	Barrier-to-autointegration factor [OS=Homo sapiens]	23.079	48	65	3	High	Peak Found	Peak Found	Peak Found	Peak Found	Peak Found	High	High	High	High	High	High	High	High	High	High	High	High	High	High	High	High	High	High	High	High
O75533-1	splicing factor 3B subunit 1 [OS=Homo sapiens]	330.226	48	425	38	High	High	High	High	High	High	High	High	High	High	High	High	High	High	High	High	High	High	High	High	High	High	High	High	Peak Found	High	Carbamyl [K602]
O75534	cold shock domain-containing protein E1 [OS=Homo sapiens]	215.225	52	514	32	High	High	High	High	High	High	High	High	High	High	High	High	High	High	High	High	High	High	High	High	High	High	High	High	High	High	Met-loss+Acetyl [N-Term]
O75569-1	Interferon-inducible double-stranded RNA-dependent protein kinase activator A [OS=Homo sapiens]	37.468	24	89	5	High	High	High	Not Found	Not Found	Not Found	High	High	High	High	High	High	High	High	High	High	High	High	High	High	High	High	High	High	High	High
O75607	Nucleoplasmin-3 [OS=Homo sapiens]	32.682	42	71	4	Not Found	Not Found	Not Found	Not Found	Not Found	Not Found	High	High	High	High	High	High	High	High	High	High	High	High	High	High	High	High	High	High	High	High	Met-loss+Acetyl [N-Term]
O75608	Acyl-protein thioesterase 1 [OS=Homo sapiens]	62.462	44	108	5	High	High	High	High	High	High	High	High	High	High	High	High	High	High	High	High	High	High	High	High	High	High	High	High	High	High
O75629	Protein CREG1 [OS=Homo sapiens]	8.022	10	20	1	Not Found	Not Found	Not Found	Peak Found	Not Found	Not Found	High	High	High	High	High	High	High	High	High	High	High	Peak Found	Peak Found	Peak Found	Not Found	Not Found	Not Found	High	High	High
O75643-1	U5 small nuclear ribonucleoprotein 200 kDa helicase [OS=Homo sapiens]	277.874	27	267	37	High	High	High	Peak Found	Peak Found	Peak Found	High	High	High	High	High	High	High	High	High	High	High	High	High	High	High	High	High	High	High	High
O75663	TIP41-like protein [OS=Homo sapiens]	36.573	31	61	6	High	High	High	Peak Found	Peak Found	Peak Found	High	High	High	High	High	High	High	High	High	High	High	High	High	High	Peak Found	Peak Found	Peak Found	High	High	High	Acetyl [N-Term]
O75683	Surfeit locus protein 6 [OS=Homo sapiens]	10.313	7	2	1	Not Found	Not Found	Not Found	Not Found	Not Found	Not Found	Not Found	Not Found	Not Found	Not Found	Not Found	Not Found	Not Found	Not Found	Not Found	High	High	Not Found	Not Found	Not Found	Not Found	Not Found	Not Found	Not Found	Not Found	Not Found
O75688	Protein phosphatase 1B [OS=Homo sapiens]	19.926	9	26	2	Peak Found	High	Peak Found	Not Found	Not Found	Not Found	Peak Found	Peak Found	Peak Found	Peak Found	High	Peak Found	Peak Found	Not Found	Peak Found	Peak Found	Peak Found	Peak Found	Peak Found	High	Peak Found	High	Peak Found	Not Found	Peak Found	Not Found
O75694	nuclear pore complex protein nup155 [OS=Homo sapiens]	65.539	12	50	8	High	High	High	Not Found	Not Found	Not Found	High	High	High	High	High	High	High	High	High	High	High	High	High	High	High	High	High	Peak Found	Not Found	Peak Found	Met-loss [N-Term]; Met-loss+Acetyl [N-Term]
O75695	Protein XRP2 [OS=Homo sapiens]	8.131	8	4	2	High	High	High	Not Found	Not Found	Not Found	Peak Found	Peak Found	Peak Found	Peak Found	Peak Found	Peak Found	Peak Found	Peak Found	Peak Found	Peak Found	Peak Found	Peak Found	Peak Found	Peak Found	Peak Found	Peak Found	High	Not Found	Not Found	Not Found
O75718	Cartilage-associated protein [OS=Homo sapiens]	114.184	48	216	15	High	High	High	Peak Found	Peak Found	High	High	High	High	High	High	High	High	High	High	High	High	High	High	High	High	High	High	High	High	High
O75746	Calcium-binding mitochondrial carrier protein Aralar1 [OS=Homo sapiens]	30.861	13	40	3	High	High	High	Not Found	Not Found	Not Found	High	High	Peak Found	High	High	High	High	Peak Found	High	High	High	Peak Found	Peak Found	Not Found	High	Peak Found	Peak Found	High	High	High
O75762	Transient receptor potential cation channel subfamily A member 1 [OS=Homo sapiens]	116.404	25	89	19	High	High	High	Peak Found	Peak Found	Peak Found	High	High	High	High	High	Peak Found	Not Found	Peak Found	Peak Found	Not Found	Peak Found	Peak Found	Not Found	Peak Found	High	High	High	Not Found	Peak Found	Peak Found
O75787	Renin receptor [OS=Homo sapiens]	4.011	4	1	1	Not Found	Not Found	Not Found	Not Found	Not Found	Not Found	Peak Found	Peak Found	Peak Found	Peak Found	Peak Found	Peak Found	Peak Found	Peak Found	Not Found	Not Found	Not Found	Not Found	Not Found	Not Found	Not Found	Not Found	Not Found	High	Not Found	Peak Found
O75821	Eukaryotic translation initiation factor 3 subunit G [OS=Homo sapiens]	147.265	69	264	19	High	High	High	High	High	High	High	High	High	High	High	High	High	High	High	High	High	High	High	High	High	High	High	High	High	High	Met-loss [N-Term]
O75822	Eukaryotic translation initiation factor 3 subunit J [OS=Homo sapiens]	66.355	50	202	11	High	High	High	High	High	High	High	High	High	High	High	High	High	High	High	High	High	High	High	High	High	High	High	High	High	High	Met-loss+Acetyl [N-Term]
O75828	Carbonyl reductase [NADPH] 3 [OS=Homo sapiens]	102.43	60	322	10	High	High	High	Not Found	High	High	High	High	High	High	High	High	High	High	High	High	High	High	High	High	High	High	High	High	High	High
O75832	26S proteasome non-ATPase regulatory subunit 10 [OS=Homo sapiens]	75.411	62	120	8	High	High	High	Peak Found	Peak Found	High	High	High	High	High	High	High	High	High	High	High	High	High	High	High	High	High	High	High	High	High	Acetyl [N-Term]
O75844	caax prenyl protease 1 homolog [OS=Homo sapiens]	65.476	24	150	9	High	High	High	High	High	High	High	High	High	High	High	High	High	High	High	High	High	High	High	High	High	High	High	High	High	High
O75874	Isocitrate dehydrogenase [NADP] cytoplasmic [OS=Homo sapiens]	297.842	70	735	23	High	High	High	High	High	High	High	High	High	High	High	High	High	High	High	High	High	High	High	High	High	High	High	High	High	High
O75884-1	Putative hydrolase RBBP9 [OS=Homo sapiens]	10.88	12	6	1	Not Found	Not Found	Not Found	Not Found	Not Found	Not Found	Not Found	High	Peak Found	Peak Found	High	Peak Found	High	Not Found	High	Peak Found	Peak Found	High	Peak Found	Peak Found	Peak Found	Not Found	Not Found	High	Peak Found	Peak Found
O75886	Signal transducing adapter molecule 2 [OS=Homo sapiens]	67.342	30	144	8	High	High	High	Peak Found	Peak Found	Peak Found	High	High	High	High	High	High	High	High	High	High	High	High	High	High	High	High	High	High	High	High	Met-loss [N-Term]
O75915	PRA1 family protein 3 [OS=Homo sapiens]	97.073	25	282	6	High	High	High	High	High	Peak Found	High	High	High	High	High	High	High	High	High	High	High	High	High	High	High	High	High	High	High	High	Acetyl [N-Term]
O75934	Pre-mRNA-splicing factor spf27 [OS=Homo sapiens]	37.662	38	31	4	Not Found	Not Found	Not Found	Not Found	Not Found	Not Found	High	High	High	High	High	High	High	High	High	High	High	High	High	High	High	High	High	High	High	Peak Found	Met-loss+Acetyl [N-Term]
O75935	Dynactin subunit 3 [OS=Homo sapiens]	6.71	17	5	2	Peak Found	Peak Found	Peak Found	Peak Found	Peak Found	Peak Found	High	High	Peak Found	Peak Found	Not Found	Peak Found	High	Peak Found	High	Not Found	Peak Found	Peak Found	Peak Found	Peak Found	Peak Found	High	Peak Found	Peak Found	Peak Found	Not Found
O75937	DnaJ homolog subfamily C member 8 [OS=Homo sapiens]	69.523	51	138	9	High	High	High	High	High	High	High	High	High	High	High	High	High	High	High	High	High	High	High	High	High	High	High	High	Peak Found	High	Met-loss+Acetyl [N-Term]
O75940	Survival of motor neuron-related-splicing factor 30 [OS=Homo sapiens]	36.048	29	26	3	Not Found	Not Found	Not Found	Not Found	Not Found	Not Found	High	High	High	High	High	Not Found	Peak Found	Peak Found	High	High	High	High	High	High	High	High	High	Not Found	Not Found	Not Found
O75947-1	ATP synthase subunit d, mitochondrial [OS=Homo sapiens]	115.236	65	206	8	High	High	Peak Found	High	Peak Found	Peak Found	High	High	High	High	High	High	High	High	High	High	High	High	High	High	High	High	High	High	High	High
O75955	Flotillin-1 [OS=Homo sapiens]	108.507	40	233	12	High	High	High	Peak Found	Not Found	Peak Found	High	High	High	High	High	High	High	High	High	High	High	High	High	High	High	High	High	High	High	High
O75962-1	Triple functional domain protein [OS=Homo sapiens]	38.623	5	21	7	Peak Found	High	Peak Found	Not Found	Not Found	Not Found	High	High	High	High	High	Peak Found	Peak Found	High	Peak Found	High	Peak Found	Peak Found	Peak Found	Peak Found	High	High	Peak Found	High	High	High
O75964	ATP synthase subunit g, mitochondrial [OS=Homo sapiens]	10.616	38	41	3	High	High	High	High	High	Peak Found	High	High	High	High	High	High	Peak Found	High	High	High	High	Peak Found	Peak Found	High	High	High	High	Peak Found	Not Found	Not Found
O75970	multiple PDZ domain protein [OS=Homo sapiens]	9.314	2	7	3	Peak Found	High	High	Not Found	Not Found	Peak Found	High	Peak Found	Peak Found	High	High	Peak Found	Peak Found	Peak Found	Peak Found	Peak Found	Peak Found	Peak Found	Peak Found	High	Peak Found	Peak Found	Peak Found	Peak Found	Peak Found	Peak Found
O75976	Carboxypeptidase D [OS=Homo sapiens]	29.127	7	21	6	Peak Found	Not Found	Peak Found	Peak Found	Peak Found	Not Found	High	High	High	Peak Found	High	High	High	High	Peak Found	Peak Found	High	High	Peak Found	Peak Found	High	High	High	High	High	High
O76003	glutaredoxin-3 [OS=Homo sapiens]	188.524	81	365	20	High	High	High	High	High	High	High	High	High	High	High	High	High	High	High	High	High	High	High	High	High	High	High	High	High	High	Met-loss+Acetyl [N-Term]
O76021	Ribosomal L1 domain-containing protein 1 [OS=Homo sapiens]	148.087	46	215	20	High	High	High	High	High	High	High	High	High	High	High	High	High	High	High	High	High	High	High	High	High	High	High	High	High	High	Acetyl [N-Term]
O76024	Wolframin [OS=Homo sapiens]	64.059	15	42	7	High	Peak Found	Peak Found	Peak Found	Peak Found	Peak Found	High	High	High	High	High	Peak Found	High	Peak Found	Peak Found	High	High	Peak Found	Peak Found	Peak Found	Peak Found	High	Peak Found	High	High	High
O76031	ATP-dependent Clp protease ATP-binding subunit clpX-like, mitochondrial [OS=Homo sapiens]	61.22	32	51	13	High	High	High	Peak Found	Peak Found	Peak Found	High	High	High	High	High	High	High	High	Peak Found	High	High	High	High	High	High	High	Peak Found	High	High	Peak Found
O76054	SEC14-like protein 2 [OS=Homo sapiens]	11.002	10	5	2	Not Found	Not Found	Not Found	Not Found	Not Found	Not Found	Not Found	Not Found	Not Found	Not Found	Not Found	Not Found	Not Found	Not Found	Not Found	Not Found	Not Found	High	Not Found	Not Found	Not Found	Not Found	Not Found	High	High	High
O76071	Probable cytosolic iron-sulfur protein assembly protein Ciao1 [OS=Homo sapiens]	49.297	35	65	7	High	High	High	High	High	High	High	High	High	High	High	High	High	High	High	High	High	High	High	High	High	High	High	High	High	High
O76074	cGMP-specific 3',5'-cyclic phosphodiesterase [OS=Homo sapiens]	50.105	15	65	11	High	High	High	Peak Found	High	Peak Found	High	High	High	High	High	Peak Found	Peak Found	Peak Found	Peak Found	Peak Found	Peak Found	High	High	High	High	High	High	High	High	High
O76080	AN1-type zinc finger protein 5 [OS=Homo sapiens]	16.792	29	8	3	High	High	High	Not Found	Not Found	Not Found	Peak Found	High	High	Not Found	Not Found	Not Found	Not Found	Not Found	Not Found	Not Found	Peak Found	Peak Found	Not Found	Not Found	Peak Found	Peak Found	Not Found	Not Found	Not Found	Not Found
O76094	Signal recognition particle subunit SRP72 [OS=Homo sapiens]	146.346	46	207	19	High	High	High	High	High	High	High	High	High	High	High	High	High	High	High	High	High	High	High	High	High	High	High	High	High	High	Met-loss+Acetyl [N-Term]
O94760-1	N(G),N(G)-dimethylarginine dimethylaminohydrolase 1 [OS=Homo sapiens]	59.166	50	154	9	High	High	High	High	High	High	High	High	High	High	High	High	High	High	High	High	High	High	High	High	High	High	High	High	High	High	Met-loss+Acetyl [N-Term]
O94776	Metastasis-associated protein MTA2 [OS=Homo sapiens]	48.615	22	58	10	High	High	High	Peak Found	Not Found	Peak Found	High	High	High	High	High	High	High	High	High	High	High	High	High	High	High	High	High	Peak Found	Peak Found	Peak Found
O94804	Serine/threonine-protein kinase 10 [OS=Homo sapiens]	47.237	10	54	4	Not Found	Peak Found	Peak Found	Not Found	Not Found	Not Found	High	High	High	High	High	High	High	Peak Found	High	High	High	High	High	Peak Found	Peak Found	High	High	High	Peak Found	High
O94808	Glutamine--fructose-6-phosphate aminotransferase [isomerizing] 2 [OS=Homo sapiens]	99.063	25	243	5	High	High	High	Peak Found	Peak Found	Peak Found	Peak Found	Peak Found	High	High	High	Peak Found	Peak Found	Peak Found	Peak Found	Not Found	Not Found	High	High	High	Peak Found	Peak Found	Peak Found	High	High	High
O94826	Mitochondrial import receptor subunit TOM70 [OS=Homo sapiens]	203.215	54	316	17	High	High	High	High	High	High	High	High	High	High	High	High	High	High	High	High	High	High	High	High	High	High	High	High	High	High	Met-loss+Acetyl [N-Term]; Acetyl [K5]; Met-loss [N-Term]; Carbamyl [K5]
O94832	Unconventional myosin-Id [OS=Homo sapiens]	39.759	10	16	6	Not Found	Not Found	Not Found	Not Found	Not Found	Not Found	Not Found	Not Found	Not Found	Not Found	Peak Found	High	High	High	Peak Found	Peak Found	Peak Found	Not Found	Peak Found	Not Found	Not Found	Not Found	Not Found	Peak Found	Peak Found	Not Found
O94842	TOX high mobility group box family member 4 [OS=Homo sapiens]	8.079	4	5	2	Peak Found	Peak Found	Peak Found	Not Found	Not Found	Peak Found	High	Peak Found	High	Peak Found	Peak Found	Peak Found	Peak Found	Peak Found	Peak Found	Peak Found	Peak Found	High	High	Peak Found	Peak Found	Peak Found	Peak Found	Not Found	Not Found	Not Found
O94851	[F-actin]-monooxygenase MICAL2 [OS=Homo sapiens]	40.922	9	32	6	High	High	High	Not Found	Peak Found	Peak Found	Peak Found	Peak Found	High	Peak Found	High	High	High	High	Peak Found	High	High	Not Found	Not Found	Not Found	High	High	High	High	High	High
O94855	Protein transport protein Sec24D [OS=Homo sapiens]	199.294	37	321	25	Peak Found	High	High	High	High	High	High	High	High	High	High	High	High	High	High	High	High	High	High	High	High	High	High	High	High	High
O94874-1	E3 UFM1-protein ligase 1 [OS=Homo sapiens]	78.264	27	103	15	High	High	High	Peak Found	Peak Found	Peak Found	High	High	High	High	High	High	High	High	High	High	High	High	High	High	High	High	High	High	High	High
O94887-1	FERM, RhoGEF and pleckstrin domain-containing protein 2 [OS=Homo sapiens]	4.58	2	9	2	High	High	Peak Found	High	High	High	Peak Found	Peak Found	Peak Found	Peak Found	Peak Found	Peak Found	Peak Found	Peak Found	Peak Found	Peak Found	Peak Found	Peak Found	Peak Found	Peak Found	Peak Found	Peak Found	Peak Found	Peak Found	Peak Found	High
O94888	UBX domain-containing protein 7 [OS=Homo sapiens]	9.406	6	25	2	High	High	High	Peak Found	High	High	High	High	High	High	High	High	High	High	High	High	High	High	High	High	High	High	High	Peak Found	Peak Found	Peak Found	Met-loss+Acetyl [N-Term]
O94901-1	SUN domain-containing protein 1 [OS=Homo sapiens]	14.029	8	8	3	Not Found	Not Found	Not Found	Not Found	Not Found	Not Found	High	High	High	Peak Found	Peak Found	Peak Found	High	Not Found	Not Found	Not Found	Not Found	Peak Found	Not Found	Not Found	High	High	High	Not Found	Not Found	Peak Found
O94903	Pyridoxal phosphate homeostasis protein [OS=Homo sapiens]	34.941	36	45	6	Peak Found	Peak Found	Peak Found	High	Peak Found	Peak Found	High	High	High	High	High	High	High	High	High	High	High	High	High	High	High	High	High	High	High	High
O94905-1	Erlin-2 [OS=Homo sapiens]	92.113	52	255	11	High	High	High	High	High	Peak Found	High	High	High	High	High	High	High	High	High	High	High	High	High	High	High	High	High	High	High	High
O94906-1	Pre-mRNA-processing factor 6 [OS=Homo sapiens]	33.342	7	38	5	High	High	High	Peak Found	Peak Found	Peak Found	High	High	High	High	High	High	High	High	High	High	High	Peak Found	Peak Found	Peak Found	High	High	High	Peak Found	Peak Found	Peak Found
O94915-1	protein furry homolog-like [OS=Homo sapiens]	10.409	1	3	2	Peak Found	High	Peak Found	Peak Found	Peak Found	Peak Found	Peak Found	Peak Found	Peak Found	Peak Found	High	Peak Found	High	Peak Found	Peak Found	Peak Found	Peak Found	Peak Found	Peak Found	Peak Found	Peak Found	Peak Found	Peak Found	Peak Found	Peak Found	Peak Found
O94919	endonuclease domain-containing 1 protein [OS=Homo sapiens]	63.57	29	68	8	Peak Found	Peak Found	Peak Found	Peak Found	Peak Found	Peak Found	Peak Found	Peak Found	Not Found	Not Found	Not Found	High	High	High	High	High	High	High	High	Peak Found	High	High	High	High	High	High
O94925-1	Glutaminase kidney isoform, mitochondrial [OS=Homo sapiens]	377.482	63	504	5	Peak Found	Not Found	Not Found	Not Found	Not Found	Not Found	Peak Found	Peak Found	Peak Found	High	High	High	High	High	Peak Found	High	High	Not Found	Peak Found	Peak Found	Peak Found	Peak Found	Peak Found	High	High	High
O94925-3	Isoform 3 of Glutaminase kidney isoform, mitochondrial [OS=Homo sapiens]	359.03	64	533	3	Peak Found	High	High	Not Found	Not Found	Not Found	High	High	High	High	High	High	High	High	High	High	High	High	High	High	High	High	High	High	High	High
O94929-1	Actin-binding LIM protein 3 [OS=Homo sapiens]	4.486	2	1	1	Not Found	Not Found	Not Found	Not Found	Not Found	Not Found	Not Found	Not Found	Not Found	Not Found	Not Found	Not Found	Not Found	Not Found	Not Found	Not Found	Not Found	Not Found	Not Found	Not Found	Not Found	Not Found	Not Found	Not Found	Not Found	High
O94973	AP-2 complex subunit alpha-2 [OS=Homo sapiens]	217.982	42	432	16	High	High	High	Peak Found	Peak Found	Peak Found	High	High	High	High	High	High	High	High	High	High	High	High	High	High	High	High	High	High	High	High
O94979	Protein transport protein Sec31A [OS=Homo sapiens]	492.884	46	1186	39	High	High	High	High	High	High	High	High	High	High	High	High	High	High	High	High	High	High	High	High	High	High	High	High	High	High
O94992	Protein HEXIM1 [OS=Homo sapiens]	28.757	14	18	3	Peak Found	High	Peak Found	Not Found	Not Found	Not Found	High	High	High	High	Peak Found	Peak Found	Peak Found	Peak Found	High	High	High	High	High	High	Peak Found	Peak Found	High	Not Found	Not Found	Not Found
O95104	Splicing factor, arginine/serine-rich 15 [OS=Homo sapiens]	18.436	6	6	3	Not Found	Not Found	Not Found	Not Found	Not Found	Not Found	Peak Found	Peak Found	High	High	High	Not Found	Not Found	Peak Found	Peak Found	Peak Found	High	High	Peak Found	High	Peak Found	Not Found	Not Found	Not Found	Not Found	Not Found
O95149	Snurportin-1 [OS=Homo sapiens]	16.526	8	12	1	Not Found	Not Found	Not Found	Not Found	Not Found	Not Found	High	Peak Found	High	High	High	Peak Found	High	High	High	High	High	Peak Found	High	High	Not Found	Peak Found	High	Peak Found	Peak Found	Peak Found	Acetyl [N-Term]
O95155	Ubiquitin conjugation factor E4 B [OS=Homo sapiens]	5.633	1	2	1	Not Found	Not Found	Not Found	Not Found	Not Found	Not Found	Not Found	Not Found	Peak Found	Peak Found	Peak Found	Peak Found	Peak Found	Peak Found	High	Not Found	High	Peak Found	Not Found	Not Found	Not Found	Not Found	Peak Found	Peak Found	Peak Found	Not Found
O95159	Zinc finger protein-like 1 [OS=Homo sapiens]	12.005	20	15	4	Not Found	Not Found	Not Found	Not Found	Not Found	Not Found	Peak Found	High	High	High	High	Peak Found	High	Peak Found	Peak Found	High	Peak Found	Peak Found	Peak Found	Peak Found	High	High	Peak Found	High	High	High
O95182	NADH dehydrogenase [ubiquinone] 1 alpha subcomplex subunit 7 [OS=Homo sapiens]	18.297	25	59	3	High	High	High	High	High	High	High	High	High	High	High	High	High	High	High	High	High	High	High	High	High	High	High	High	High	High
O95183	vesicle-associated membrane protein 5 [OS=Homo sapiens]	11.735	22	6	2	Peak Found	Peak Found	Peak Found	Not Found	Not Found	Not Found	High	High	Peak Found	Peak Found	Peak Found	Peak Found	Peak Found	Peak Found	Peak Found	High	High	Not Found	Peak Found	Peak Found	Not Found	Peak Found	Peak Found	Peak Found	Peak Found	Peak Found
O95197-3	Isoform 3 of Reticulon-3 [OS=Homo sapiens]	52.919	29	99	4	High	High	Peak Found	Peak Found	Peak Found	Peak Found	High	High	High	High	High	High	High	High	High	High	High	High	High	High	High	High	Peak Found	High	High	High	Met-loss+Acetyl [N-Term]
O95202-1	mitochondrial proton/calcium exchanger protein [OS=Homo sapiens]	81.701	21	116	10	High	High	High	High	High	High	High	High	High	High	High	High	High	High	High	High	High	High	High	High	High	High	High	High	High	High
O95208-1	epsin-2 [OS=Homo sapiens]	17.852	12	11	3	Not Found	Not Found	Not Found	Not Found	Not Found	Not Found	High	High	High	Peak Found	Peak Found	Peak Found	Peak Found	High	Not Found	Not Found	Not Found	High	High	High	Peak Found	Not Found	High	Peak Found	Not Found	Not Found
O95210	Starch-binding domain-containing protein 1 [OS=Homo sapiens]	25.717	20	14	4	Peak Found	High	High	Not Found	Not Found	Not Found	High	High	Peak Found	Peak Found	Peak Found	Peak Found	High	Peak Found	Peak Found	Peak Found	Peak Found	Peak Found	Peak Found	Peak Found	High	Peak Found	Peak Found	High	High	High
O95218-1	Zinc finger Ran-binding domain-containing protein 2 [OS=Homo sapiens]	12.061	11	31	3	High	High	High	Peak Found	Peak Found	High	High	High	High	High	High	Peak Found	High	High	High	Peak Found	High	High	High	Peak Found	High	High	High	Peak Found	Peak Found	High
O95219	sorting nexin-4 [OS=Homo sapiens]	4.795	6	3	2	Not Found	Not Found	Not Found	Not Found	Not Found	Not Found	Not Found	Not Found	Peak Found	Peak Found	Peak Found	Not Found	Peak Found	High	Peak Found	High	High	Peak Found	Peak Found	Peak Found	Peak Found	Not Found	Not Found	Not Found	Not Found	Not Found
O95232-1	Luc7-like protein 3 [OS=Homo sapiens]	66.161	25	64	6	High	High	High	Not Found	Not Found	Not Found	High	High	High	High	High	High	High	High	High	High	High	High	High	High	High	High	High	High	Peak Found	High	Acetyl [N-Term]
O95249-1	Golgi SNAP receptor complex member 1 [OS=Homo sapiens]	31.402	29	44	5	High	High	High	Peak Found	Peak Found	Peak Found	High	High	High	High	High	High	High	High	High	High	High	High	High	High	High	Peak Found	Peak Found	High	High	High	Met-loss+Acetyl [N-Term]
O95273-1	Cyclin-D1-binding protein 1 [OS=Homo sapiens]	6.094	4	2	1	Not Found	Not Found	Not Found	Not Found	Not Found	Not Found	Not Found	Not Found	Not Found	Not Found	Not Found	Not Found	Not Found	Not Found	Not Found	Not Found	Not Found	Not Found	Not Found	Not Found	High	Not Found	High	Not Found	Not Found	Not Found
O95292	Vesicle-associated membrane protein-associated protein B/C [OS=Homo sapiens]	51.782	37	107	6	High	High	High	High	Peak Found	Peak Found	High	High	High	High	High	High	High	High	High	High	High	High	High	High	High	High	High	High	High	High
O95297-1	Myelin protein zero-like protein 1 [OS=Homo sapiens]	13.213	13	32	3	High	High	High	High	Peak Found	Peak Found	High	High	High	High	High	High	High	High	Peak Found	Peak Found	Peak Found	Peak Found	Peak Found	Peak Found	High	High	High	High	High	High
O95299	NADH dehydrogenase [ubiquinone] 1 alpha subcomplex subunit 10, mitochondrial [OS=Homo sapiens]	38.675	26	52	6	High	High	High	Peak Found	High	Peak Found	High	High	High	High	High	High	High	High	High	High	High	High	High	High	High	High	High	High	High	High
O95302	Peptidyl-prolyl cis-trans isomerase FKBP9 [OS=Homo sapiens]	180.586	43	389	22	High	High	High	High	High	High	High	High	High	High	High	High	High	High	High	High	High	High	High	High	High	High	High	High	High	High
O95336	6-phosphogluconolactonase [OS=Homo sapiens]	118.548	85	324	13	High	High	High	Peak Found	High	Peak Found	High	High	High	High	High	High	High	High	High	High	High	High	High	High	High	High	High	High	High	High	Met-loss+Acetyl [N-Term]
O95340	bifunctional 3'-phosphoadenosine 5'-phosphosulfate synthase 2 [OS=Homo sapiens]	295.129	64	451	26	High	High	High	High	High	High	High	High	High	High	High	High	High	High	High	High	High	High	High	High	High	High	High	High	High	High
O95347-1	structural maintenance of chromosomes protein 2 [OS=Homo sapiens]	52.356	10	43	8	High	High	High	Not Found	Not Found	Not Found	High	High	High	High	High	Peak Found	Peak Found	Peak Found	High	Peak Found	Peak Found	Peak Found	Peak Found	High	High	High	High	Not Found	Not Found	Not Found
O95352	Ubiquitin-like modifier-activating enzyme ATG7 [OS=Homo sapiens]	52.262	19	53	8	High	Not Found	Not Found	Not Found	Not Found	Not Found	High	High	High	High	High	High	High	High	High	High	High	High	High	High	Peak Found	High	High	High	High	High
O95361-1	Tripartite motif-containing protein 16 [OS=Homo sapiens]	14.079	9	7	3	Not Found	Not Found	Not Found	Not Found	Not Found	Not Found	High	High	Peak Found	Not Found	Not Found	Peak Found	Peak Found	Peak Found	Not Found	High	Peak Found	Peak Found	Not Found	High	Not Found	Not Found	Not Found	Not Found	Peak Found	Peak Found	Met-loss+Acetyl [N-Term]
O95372	acyl-protein thioesterase 2 [OS=Homo sapiens]	47.222	38	61	4	Not Found	Not Found	Not Found	Not Found	Not Found	Not Found	High	High	High	High	High	High	High	High	High	High	High	High	High	High	High	High	High	High	High	High
O95373	Importin-7 [OS=Homo sapiens]	213.887	32	432	22	High	High	High	High	High	High	High	High	High	High	High	High	High	High	High	High	High	High	High	High	High	High	High	High	High	High	Acetyl [N-Term]
O95376	E3 ubiquitin-protein ligase ARIH2 [OS=Homo sapiens]	7.382	3	10	1	Not Found	Peak Found	Not Found	Not Found	Not Found	Not Found	High	Peak Found	High	High	High	Peak Found	Peak Found	Peak Found	High	Peak Found	Not Found	Peak Found	High	High	Peak Found	Peak Found	High	Not Found	Not Found	Not Found
O95379	Tumor necrosis factor alpha-induced protein 8 [OS=Homo sapiens]	15.196	20	19	2	Not Found	Not Found	Not Found	Not Found	Not Found	Not Found	High	High	High	High	High	High	High	High	High	High	High	High	High	High	High	High	High	Peak Found	Peak Found	High	Acetyl [N-Term]
O95394	phosphoacetylglucosamine mutase [OS=Homo sapiens]	184.273	63	343	23	High	High	High	High	High	High	High	High	High	High	High	High	High	High	High	High	High	High	High	High	High	High	High	High	High	High	Acetyl [N-Term]
O95400	CD2 antigen cytoplasmic tail-binding protein 2 [OS=Homo sapiens]	26.427	21	29	4	High	High	High	Not Found	Not Found	Not Found	Peak Found	High	High	High	High	High	Peak Found	High	High	High	High	High	High	High	High	High	High	Peak Found	Peak Found	Peak Found
O95425-4	Isoform SV4 of Supervillin [OS=Homo sapiens]	27.715	6	17	7	Not Found	Not Found	Peak Found	Not Found	Peak Found	Peak Found	Peak Found	Peak Found	Peak Found	Peak Found	Not Found	Peak Found	Peak Found	Peak Found	High	High	High	High	High	High	Peak Found	Peak Found	High	High	High	High
O95429	BAG family molecular chaperone regulator 4 [OS=Homo sapiens]	4.686	4	1	1	Not Found	Not Found	Not Found	Not Found	Not Found	Not Found	High	Not Found	Not Found	Not Found	Not Found	Not Found	Not Found	Not Found	Not Found	Not Found	Not Found	Not Found	Not Found	Not Found	Not Found	Not Found	Not Found	Not Found	Not Found	Not Found
O95433	activator of 90 kDa heat shock protein ATPase homolog 1 [OS=Homo sapiens]	115.412	54	209	14	High	High	High	High	High	High	High	High	High	High	High	High	High	High	High	High	High	High	High	High	High	High	High	High	High	High
O95456	Proteasome assembly chaperone 1 [OS=Homo sapiens]	19.007	19	48	4	High	High	High	High	Peak Found	High	High	High	High	High	High	High	High	High	High	High	High	High	High	High	High	High	High	High	Peak Found	Peak Found	Met-loss+Acetyl [N-Term]
O95479	GDH/6PGL endoplasmic bifunctional protein [OS=Homo sapiens]	94.134	36	86	19	High	High	Peak Found	Peak Found	Not Found	Not Found	High	High	High	High	High	High	High	High	High	High	High	High	High	High	High	High	High	High	High	High
O95486-1	Protein transport protein Sec24A [OS=Homo sapiens]	58.573	11	87	8	High	High	High	Peak Found	Peak Found	Peak Found	High	High	High	High	High	High	High	High	High	High	High	High	High	High	High	High	High	High	High	High
O95487-1	Protein transport protein Sec24B [OS=Homo sapiens]	48.584	12	69	8	High	High	High	High	High	High	High	High	High	High	High	High	High	High	High	High	High	High	High	High	High	High	High	High	High	High	Met-loss+Acetyl [N-Term]
O95497	Pantetheinase [OS=Homo sapiens]	7.458	4	3	1	Not Found	Not Found	Not Found	Not Found	Not Found	Not Found	Not Found	Not Found	Not Found	Not Found	Not Found	Not Found	Not Found	Not Found	Not Found	Not Found	Not Found	Not Found	Not Found	Not Found	Not Found	Not Found	Not Found	High	High	High
O95563	Mitochondrial pyruvate carrier 2 [OS=Homo sapiens]	5.467	9	2	1	Not Found	Not Found	Not Found	Not Found	Not Found	Not Found	Peak Found	Peak Found	Peak Found	Peak Found	Peak Found	High	Peak Found	Peak Found	Peak Found	Peak Found	Peak Found	Not Found	Peak Found	Peak Found	Peak Found	Peak Found	Peak Found	Not Found	Peak Found	High
O95571	Persulfide dioxygenase ETHE1, mitochondrial [OS=Homo sapiens]	103.429	69	159	11	High	High	High	Peak Found	High	High	High	High	High	High	High	High	High	High	High	High	High	High	High	High	High	High	High	High	High	High
O95573	long-chain-fatty-acid--CoA ligase 3 [OS=Homo sapiens]	148.309	45	230	21	High	High	High	Peak Found	Peak Found	Peak Found	High	High	High	High	High	High	High	High	High	High	High	High	High	High	High	High	High	High	High	High	Acetyl [N-Term]
O95628-1	CCR4-NOT transcription complex subunit 4 [OS=Homo sapiens]	4.724	2	1	1	Not Found	Peak Found	Not Found	Not Found	Not Found	Not Found	Not Found	Not Found	Not Found	Peak Found	Not Found	Not Found	Peak Found	Not Found	Peak Found	Peak Found	Peak Found	Not Found	Peak Found	High	Not Found	Not Found	Peak Found	Not Found	Not Found	Not Found
O95630	STAM-binding protein [OS=Homo sapiens]	17.472	13	22	4	Peak Found	Peak Found	Peak Found	Peak Found	Peak Found	Not Found	High	High	High	High	High	High	Peak Found	High	High	Peak Found	High	High	Peak Found	Peak Found	High	High	Peak Found	High	Peak Found	High
O95671-1	N-acetylserotonin O-methyltransferase-like protein [OS=Homo sapiens]	4.42	6	3	2	Not Found	Not Found	Not Found	Not Found	Not Found	Not Found	Peak Found	Peak Found	Peak Found	Peak Found	Peak Found	Peak Found	Peak Found	Peak Found	High	Peak Found	Peak Found	Peak Found	Peak Found	Peak Found	Peak Found	High	Not Found	Peak Found	High	Peak Found
O95674-1	phosphatidate cytidylyltransferase 2 [OS=Homo sapiens]	18.058	16	6	4	Not Found	Not Found	Peak Found	Not Found	Not Found	Not Found	High	High	Peak Found	Peak Found	Peak Found	Not Found	Peak Found	Peak Found	Not Found	Peak Found	Not Found	Not Found	Not Found	Not Found	Peak Found	High	High	Peak Found	Peak Found	Peak Found
O95684	FGFR1 oncogene partner [OS=Homo sapiens]	8.195	8	1	1	Not Found	Not Found	Not Found	Not Found	Not Found	Not Found	Not Found	Not Found	Not Found	Not Found	High	Not Found	Not Found	Not Found	Not Found	Not Found	Not Found	Not Found	Not Found	Not Found	Not Found	Not Found	Not Found	Not Found	Not Found	Not Found	Met-loss+Acetyl [N-Term]
O95716	ras-related protein Rab-3D [OS=Homo sapiens]	27.785	24	39	1	Not Found	Not Found	Not Found	Not Found	Not Found	Not Found	High	High	High	High	Peak Found	High	High	Peak Found	Peak Found	Peak Found	Peak Found	High	High	High	High	High	High	Peak Found	Peak Found	High
O95721	Synaptosomal-associated protein 29 [OS=Homo sapiens]	38.134	34	90	6	High	High	High	High	High	High	High	High	High	High	High	High	High	High	High	High	High	High	High	High	High	High	High	High	High	High
O95747	Serine/threonine-protein kinase OSR1 [OS=Homo sapiens]	69.913	31	119	8	High	High	High	High	High	High	High	High	High	High	High	High	High	High	High	High	High	High	High	High	High	High	High	High	High	High
O95757	Heat shock 70 kDa protein 4L [OS=Homo sapiens]	58.781	12	90	3	Not Found	Not Found	Not Found	Not Found	Not Found	Not Found	Peak Found	Peak Found	Not Found	Not Found	Peak Found	Peak Found	Not Found	Not Found	Not Found	Not Found	High	Peak Found	High	Peak Found	Not Found	Not Found	Not Found	Not Found	Not Found	Not Found
O95777	U6 snRNA-associated Sm-like protein LSm8 [OS=Homo sapiens]	74.481	93	101	6	High	High	High	High	High	High	Peak Found	High	High	High	High	High	High	High	Peak Found	High	High	High	High	High	High	High	High	Peak Found	Peak Found	Peak Found	Met-loss+Acetyl [N-Term]
O95782	AP-2 complex subunit alpha-1 [OS=Homo sapiens]	330.402	59	781	34	High	High	High	High	High	High	High	High	High	High	High	High	High	High	High	High	High	High	High	High	High	High	High	High	High	High
O95793	double-stranded RNA-binding protein Staufen homolog 1 [OS=Homo sapiens]	78.864	37	163	15	High	High	High	High	High	High	High	High	High	High	High	High	High	High	High	High	High	High	High	High	High	High	High	High	High	High
O95810	caveolae-associated protein 2 [OS=Homo sapiens]	159.428	48	242	15	High	High	High	High	High	High	High	High	High	High	High	High	High	High	High	Peak Found	High	High	High	High	High	High	High	Peak Found	Peak Found	Peak Found
O95816	BAG family molecular chaperone regulator 2 [OS=Homo sapiens]	146.423	65	272	13	High	High	High	High	High	High	High	High	High	High	High	High	High	High	High	High	High	High	High	High	High	High	High	High	High	High
O95817	BAG family molecular chaperone regulator 3 [OS=Homo sapiens]	299.38	81	422	30	High	High	High	High	High	High	High	High	High	High	High	High	High	High	High	High	High	High	High	High	High	High	High	High	High	High	Met-loss+Acetyl [N-Term]
O95819-6	Isoform 6 of Mitogen-activated protein kinase kinase kinase kinase 4 [OS=Homo sapiens]	83.167	14	97	6	High	High	High	Peak Found	Not Found	Not Found	High	High	High	High	High	High	High	High	High	High	High	High	High	High	High	High	High	High	High	High
O95825-1	Quinone oxidoreductase-like protein 1 [OS=Homo sapiens]	20.568	20	9	3	Peak Found	Not Found	Not Found	Not Found	Peak Found	Not Found	Peak Found	Not Found	High	Peak Found	High	Peak Found	Peak Found	Peak Found	High	Peak Found	Peak Found	High	Peak Found	High	Peak Found	High	High	Peak Found	Peak Found	Peak Found
O95831-1	Apoptosis-inducing factor 1, mitochondrial [OS=Homo sapiens]	134.124	51	246	21	High	High	High	Peak Found	High	High	High	High	High	High	High	High	High	High	High	High	High	High	High	High	High	High	High	High	High	High
O95834	echinoderm microtubule-associated protein-like 2 [OS=Homo sapiens]	13.051	7	12	3	Peak Found	Peak Found	Not Found	Not Found	Not Found	Not Found	Peak Found	Peak Found	Peak Found	Peak Found	Peak Found	High	High	Peak Found	High	High	High	Peak Found	Peak Found	Peak Found	Peak Found	High	High	High	High	High
O95861-1	3'(2'),5'-bisphosphate nucleotidase 1 [OS=Homo sapiens]	78.94	62	146	12	High	High	High	High	High	High	High	High	High	High	High	High	High	High	High	High	High	High	High	High	High	High	High	High	High	High
O95864	fatty acid desaturase 2 [OS=Homo sapiens]	20.268	12	20	4	Peak Found	Peak Found	Peak Found	Not Found	Not Found	Not Found	High	High	High	High	High	High	High	High	Peak Found	Peak Found	Peak Found	High	Peak Found	High	High	High	High	Peak Found	Peak Found	Peak Found
O95865	N(G),N(G)-dimethylarginine dimethylaminohydrolase 2 [OS=Homo sapiens]	62.449	49	109	9	High	High	High	High	High	High	High	High	High	High	High	High	High	High	High	High	High	High	High	High	High	High	High	Peak Found	Peak Found	Peak Found
O95881	Thioredoxin domain-containing protein 12 [OS=Homo sapiens]	90.47	59	218	6	High	High	High	High	High	Peak Found	High	High	High	High	High	High	High	High	High	High	High	High	High	High	High	High	High	High	High	High
O95926	Pre-mRNA-splicing factor syf2 [OS=Homo sapiens]	5.419	12	1	1	Not Found	Not Found	Not Found	Not Found	Not Found	Not Found	Not Found	Not Found	Peak Found	Peak Found	Peak Found	Not Found	Not Found	Not Found	Not Found	Not Found	Peak Found	Not Found	Peak Found	Not Found	Peak Found	High	Not Found	Not Found	Not Found	Not Found	Met-loss+Acetyl [N-Term]
O95965	Integrin beta-like protein 1 [OS=Homo sapiens]	40.242	13	25	5	Not Found	Not Found	Not Found	Not Found	Not Found	Not Found	Not Found	Not Found	Not Found	Not Found	Not Found	Not Found	Not Found	Not Found	Not Found	Not Found	Not Found	Not Found	Not Found	Not Found	Not Found	Not Found	Not Found	High	High	High
O95980	Reversion-inducing cysteine-rich protein with Kazal motifs [OS=Homo sapiens]	15.639	4	5	3	Not Found	Not Found	Not Found	Not Found	Not Found	Not Found	High	High	Not Found	Peak Found	Peak Found	High	Peak Found	High	Peak Found	Peak Found	Not Found	Not Found	Not Found	Not Found	Not Found	Not Found	Not Found	High	Peak Found	Peak Found
O95989	Diphosphoinositol polyphosphate phosphohydrolase 1 [OS=Homo sapiens]	17.391	22	9	2	Not Found	Not Found	Not Found	Not Found	Not Found	Not Found	High	Peak Found	High	High	High	Peak Found	Peak Found	Peak Found	Peak Found	Peak Found	Peak Found	Peak Found	High	High	Peak Found	Not Found	Not Found	Peak Found	Peak Found	Peak Found
O95994	Anterior gradient protein 2 homolog [OS=Homo sapiens]	44.654	20	9	2	High	Not Found	Not Found	Peak Found	Not Found	Not Found	Peak Found	Not Found	Peak Found	Peak Found	Peak Found	High	Not Found	Not Found	High	Peak Found	Peak Found	High	Peak Found	Peak Found	Peak Found	Peak Found	Peak Found	Not Found	Not Found	Not Found
O95999	B-cell lymphoma/leukemia 10 [OS=Homo sapiens]	18.3	22	11	3	High	Not Found	High	High	High	High	Peak Found	High	Peak Found	Peak Found	Peak Found	Not Found	Peak Found	Not Found	Peak Found	Not Found	Peak Found	High	High	High	Peak Found	Peak Found	Not Found	Peak Found	High	Peak Found
O96000	NADH dehydrogenase [ubiquinone] 1 beta subcomplex subunit 10 [OS=Homo sapiens]	18.047	30	43	4	High	High	High	Peak Found	High	High	High	High	High	High	High	High	High	High	High	High	High	High	High	High	High	High	High	High	High	High	Met-loss [N-Term]
O96005-1	Cleft lip and palate transmembrane protein 1 [OS=Homo sapiens]	126.478	30	203	12	High	High	High	High	High	High	High	High	High	High	High	High	High	High	High	High	High	High	High	High	High	High	High	High	High	High	Met-loss+Acetyl [N-Term]
O96007	molybdopterin synthase catalytic subunit [OS=Homo sapiens]	7.899	11	18	1	Not Found	Not Found	Not Found	Not Found	Not Found	Not Found	High	Peak Found	High	High	High	High	High	High	Peak Found	High	High	High	High	Peak Found	Not Found	Peak Found	Peak Found	High	High	Peak Found
O96008	Mitochondrial import receptor subunit TOM40 homolog [OS=Homo sapiens]	116.422	46	126	8	Not Found	Peak Found	Peak Found	Peak Found	Not Found	Not Found	High	High	High	High	High	High	High	High	High	High	High	High	High	High	High	High	High	High	High	High
O96011-1	Peroxisomal membrane protein 11B [OS=Homo sapiens]	14.956	16	19	4	High	Peak Found	High	Peak Found	Peak Found	Peak Found	High	High	Peak Found	Peak Found	High	High	High	High	High	Peak Found	Peak Found	Peak Found	Not Found	Peak Found	Peak Found	Peak Found	Peak Found	High	High	High
O96013-1	serine/threonine-protein kinase PAK 4 [OS=Homo sapiens]	19.631	9	22	2	Not Found	Not Found	Not Found	Not Found	Not Found	Not Found	High	High	High	High	High	High	High	High	High	High	High	High	High	High	High	High	High	Peak Found	Not Found	Peak Found
O96019-1	Actin-like protein 6A [OS=Homo sapiens]	115.686	47	171	12	High	High	High	High	High	High	High	High	High	High	High	High	High	High	High	High	High	High	High	High	High	High	High	High	High	High	Met-loss+Acetyl [N-Term]
P00167-1	Cytochrome b5 [OS=Homo sapiens]	60.845	50	96	4	High	High	High	High	Peak Found	Not Found	High	High	High	High	High	High	High	High	High	High	High	High	High	High	High	High	High	High	High	High	Met-loss+Acetyl [N-Term]
P00325	Alcohol dehydrogenase 1B [OS=Homo sapiens]	7.88	4	1	1	Not Found	Not Found	Not Found	Not Found	Not Found	Not Found	Not Found	Peak Found	Not Found	Not Found	Not Found	Peak Found	Peak Found	High	Peak Found	Peak Found	Not Found	Peak Found	Peak Found	Peak Found	Peak Found	Not Found	Peak Found	Not Found	Not Found	Not Found
P00338-1	L-lactate dehydrogenase A chain [OS=Homo sapiens]	712.112	88	2486	31	High	High	High	High	High	High	High	High	High	High	High	High	High	High	High	High	High	High	High	High	High	High	High	High	High	High	Met-loss+Acetyl [N-Term]; Acetyl [K5]; Met-loss [N-Term]; Carbamyl [K5; K118]
P00352	Retinal dehydrogenase 1 [OS=Homo sapiens]	385.321	86	520	32	High	High	High	High	High	High	High	High	High	High	High	Peak Found	Peak Found	Peak Found	High	High	High	High	High	High	High	High	High	High	High	High	Met-loss+Acetyl [N-Term]
P00367	Glutamate dehydrogenase 1, mitochondrial [OS=Homo sapiens]	218.929	56	559	23	High	High	High	High	High	High	High	High	High	High	High	High	High	High	High	High	High	High	High	High	High	High	High	High	High	High
P00374	dihydrofolate reductase [OS=Homo sapiens]	10.985	18	7	2	Not Found	Not Found	Not Found	Not Found	Peak Found	Not Found	Not Found	Not Found	High	High	High	Not Found	Not Found	Not Found	High	Peak Found	High	Peak Found	High	High	Not Found	Peak Found	Peak Found	Not Found	Peak Found	Not Found
P00387	NADH-cytochrome b5 reductase 3 [OS=Homo sapiens]	375.964	65	633	16	High	High	High	High	High	High	High	High	High	High	High	High	High	High	High	High	High	High	High	High	High	High	High	High	High	High
P00390	Glutathione reductase, mitochondrial [OS=Homo sapiens]	174.06	69	281	18	High	High	High	High	High	High	High	High	High	High	High	High	High	High	High	High	High	High	High	High	High	High	High	High	High	High
P00395	Cytochrome c oxidase subunit 1 [OS=Homo sapiens]	14.435	6	11	1	Not Found	Not Found	Not Found	Not Found	Not Found	Not Found	High	High	High	High	High	Peak Found	High	Not Found	High	High	Peak Found	Peak Found	Peak Found	Peak Found	Not Found	Not Found	Not Found	Peak Found	High	Not Found
P00403	Cytochrome c oxidase subunit 2 [OS=Homo sapiens]	37.89	42	126	5	High	High	High	Peak Found	High	High	High	High	High	High	High	High	High	High	High	High	High	High	High	High	High	High	High	High	High	High
P00414	Cytochrome c oxidase subunit 3 [OS=Homo sapiens]	3.549	5	10	1	High	High	Peak Found	Not Found	Not Found	Not Found	High	High	High	Peak Found	High	Peak Found	Peak Found	High	High	Peak Found	Peak Found	Peak Found	Peak Found	Peak Found	High	Peak Found	Peak Found	Peak Found	Peak Found	Peak Found
P00441	Superoxide dismutase [Cu-Zn] [OS=Homo sapiens]	393.775	86	813	11	High	High	High	High	High	High	High	High	High	High	High	High	High	High	High	High	High	High	High	High	High	High	High	High	High	High
P00492	Hypoxanthine-guanine phosphoribosyltransferase [OS=Homo sapiens]	60.255	67	151	9	High	High	High	High	High	High	High	High	High	High	High	High	High	High	High	High	High	High	High	High	High	High	High	Peak Found	Peak Found	Peak Found
P00505	Aspartate aminotransferase, mitochondrial [OS=Homo sapiens]	186.699	60	484	21	High	High	High	High	High	High	High	High	High	High	High	High	High	High	High	High	High	High	High	High	High	High	High	High	High	High
P00533-1	epidermal growth factor receptor [OS=Homo sapiens]	87.252	21	79	16	High	High	High	Peak Found	Peak Found	Peak Found	High	High	High	High	High	High	High	High	Peak Found	High	Peak Found	High	High	High	High	High	High	High	High	High
P00558	phosphoglycerate kinase 1 [OS=Homo sapiens]	668.195	83	2033	33	High	High	High	High	High	High	High	High	High	High	High	High	High	High	High	High	High	High	High	High	High	High	High	High	High	High	Met-loss+Acetyl [N-Term]; Acetyl [K388]
P00568	Adenylate kinase isoenzyme 1 [OS=Homo sapiens]	178.492	64	400	12	High	High	High	High	High	High	High	High	High	High	High	High	High	High	High	High	High	High	High	High	High	High	High	High	High	High	Acetyl [K172]; Carbamyl [K172]
P00734	Prothrombin [OS=Homo sapiens]	31.026	9	28	6	Peak Found	Peak Found	Peak Found	Peak Found	Peak Found	Peak Found	Peak Found	Peak Found	Peak Found	Peak Found	Peak Found	High	High	Peak Found	High	High	High	Peak Found	High	Peak Found	High	High	High	High	High	High
P00747	Plasminogen [OS=Homo sapiens]	13.647	5	5	2	Not Found	Not Found	Not Found	Not Found	Not Found	Not Found	Not Found	Not Found	Not Found	Not Found	Not Found	Not Found	Not Found	Not Found	Not Found	Not Found	Not Found	Not Found	Not Found	Not Found	Not Found	Not Found	Not Found	High	High	High
P00749	Urokinase-type plasminogen activator [OS=Homo sapiens]	6.358	6	8	2	Peak Found	Peak Found	Peak Found	Not Found	Not Found	Not Found	High	High	High	High	Peak Found	Not Found	Not Found	Not Found	Peak Found	Peak Found	Peak Found	Peak Found	Peak Found	Peak Found	High	Peak Found	Peak Found	High	Peak Found	High
P00750-1	Tissue-type plasminogen activator [OS=Homo sapiens]	87.557	29	116	12	High	High	High	Peak Found	Peak Found	Peak Found	Peak Found	Peak Found	High	High	High	High	High	High	Peak Found	Peak Found	Peak Found	High	High	High	High	High	High	High	High	High
P00966	Argininosuccinate synthase [OS=Homo sapiens]	34.431	27	15	5	High	Peak Found	Peak Found	High	High	High	Peak Found	Not Found	Peak Found	Peak Found	Peak Found	High	Peak Found	Peak Found	Peak Found	Peak Found	High	High	Peak Found	Peak Found	Peak Found	Peak Found	Peak Found	High	Peak Found	High
P01008	Antithrombin-III [OS=Homo sapiens]	6.61	7	4	2	Not Found	Peak Found	Not Found	Not Found	Not Found	Not Found	Not Found	Not Found	Not Found	Not Found	Not Found	Not Found	Not Found	Not Found	Not Found	Not Found	Not Found	Not Found	Not Found	Peak Found	Not Found	Not Found	Not Found	High	High	High
P01023	alpha-2-macroglobulin [OS=Homo sapiens]	47.428	4	228	4	High	High	High	High	High	High	High	High	High	High	High	High	High	High	High	High	High	High	High	High	High	High	High	High	High	High	Acetyl [K1162]
P01033	Metalloproteinase inhibitor 1 [OS=Homo sapiens]	130.789	57	157	8	Peak Found	High	High	High	High	High	High	High	High	High	High	High	High	High	High	High	High	High	High	High	High	High	Peak Found	High	High	High
P01034	Cystatin-C [OS=Homo sapiens]	15.18	37	12	4	Peak Found	High	High	Peak Found	High	Peak Found	Peak Found	Peak Found	Peak Found	Peak Found	Peak Found	Peak Found	High	Peak Found	Peak Found	Peak Found	Peak Found	High	High	High	High	High	Peak Found	High	High	High
P01111	GTPase NRas [OS=Homo sapiens]	57.752	51	80	2	Peak Found	Peak Found	Peak Found	Not Found	Not Found	Peak Found	Peak Found	Peak Found	High	Peak Found	Peak Found	Peak Found	Peak Found	Peak Found	Peak Found	Peak Found	Peak Found	Peak Found	Peak Found	Peak Found	High	High	Peak Found	Not Found	Not Found	Peak Found
P01116-2	Isoform 2B of GTPase KRas [OS=Homo sapiens]	60.68	54	87	2	Not Found	Not Found	Not Found	Not Found	Not Found	Not Found	High	Peak Found	Peak Found	High	Peak Found	High	High	Peak Found	Peak Found	Peak Found	Peak Found	High	Peak Found	Peak Found	High	High	High	Not Found	Not Found	Not Found
P01130	Low-density lipoprotein receptor [OS=Homo sapiens]	28.045	10	29	5	High	High	High	Not Found	Not Found	Not Found	High	High	High	High	High	High	High	High	Peak Found	Not Found	Peak Found	Peak Found	Peak Found	Peak Found	Peak Found	High	Peak Found	High	High	High
P01892	HLA class I histocompatibility antigen, A-2 alpha chain [OS=Homo sapiens]	188.013	59	352	1	Not Found	Not Found	Not Found	Not Found	Not Found	Not Found	Not Found	Not Found	Not Found	Not Found	Not Found	High	Peak Found	High	High	High	High	Not Found	Not Found	Not Found	Not Found	Not Found	Not Found	Not Found	Not Found	Not Found
P02452	Collagen alpha-1(I) chain [OS=Homo sapiens]	694.571	61	1703	57	High	High	High	High	High	High	High	High	High	High	High	High	High	High	High	High	High	High	High	High	High	High	High	High	High	High
P02461	Collagen alpha-1(III) chain [OS=Homo sapiens]	262.084	33	503	32	High	High	High	Peak Found	Peak Found	Peak Found	High	High	High	High	High	High	High	High	High	High	High	High	High	High	High	High	High	High	High	High
P02462	Collagen alpha-1(IV) chain [OS=Homo sapiens]	53.019	6	57	6	Peak Found	High	High	Not Found	Not Found	Not Found	High	High	Peak Found	Peak Found	Peak Found	High	High	High	Peak Found	Peak Found	Peak Found	Peak Found	Peak Found	Peak Found	High	High	High	High	High	High
P02533	Keratin, type I cytoskeletal 14 [OS=Homo sapiens]	40.914	25	108	3	Not Found	Not Found	Not Found	Not Found	Not Found	Not Found	Not Found	Not Found	Not Found	Not Found	Not Found	Not Found	Not Found	Not Found	High	Peak Found	High	Not Found	Peak Found	Not Found	Not Found	Not Found	Not Found	High	High	High
P02545	Prelamin-A/C [OS=Homo sapiens]	927.932	76	4893	5	High	High	High	High	High	High	High	High	High	High	High	High	High	High	High	High	High	High	High	High	High	High	High	High	High	High	Carbamyl [K123; K316; K378]
P02545-2	Isoform C of Prelamin-A/C [OS=Homo sapiens]	841.741	77	4812	2	Not Found	Not Found	Not Found	Not Found	Not Found	Not Found	High	High	High	High	High	High	High	High	High	High	High	High	High	High	High	High	High	High	High	High	Carbamyl [K123; K316; K378]
P02647	Apolipoprotein A-I [OS=Homo sapiens]	15.139	6	11	1	Not Found	Not Found	Not Found	Not Found	Not Found	Not Found	Peak Found	Peak Found	Peak Found	Peak Found	Peak Found	Peak Found	Peak Found	Not Found	Peak Found	Not Found	Peak Found	Peak Found	Peak Found	Peak Found	Not Found	Not Found	Not Found	High	High	High
P02671-1	Fibrinogen alpha chain [OS=Homo sapiens]	15.978	5	22	3	High	High	High	High	High	High	Not Found	Peak Found	Not Found	Not Found	Not Found	Peak Found	High	High	Peak Found	Peak Found	Peak Found	Peak Found	High	Peak Found	Peak Found	High	High	Not Found	Not Found	Not Found
P02675	Fibrinogen beta chain [OS=Homo sapiens]	78.756	31	81	11	High	High	High	High	High	High	Peak Found	Peak Found	Peak Found	Peak Found	Peak Found	High	High	High	High	High	High	Peak Found	High	High	High	High	High	Peak Found	Peak Found	Peak Found
P02749	Beta-2-glycoprotein 1 [OS=Homo sapiens]	4.053	3	2	1	Not Found	Not Found	Not Found	Not Found	Not Found	Not Found	Not Found	Not Found	Not Found	Not Found	Not Found	Not Found	Not Found	Not Found	Not Found	Not Found	Not Found	Not Found	Not Found	Not Found	Not Found	Not Found	Not Found	Not Found	High	High
P02753	Retinol-binding protein 4 [OS=Homo sapiens]	4.769	18	2	2	Not Found	Not Found	Not Found	Not Found	Not Found	Not Found	Not Found	Not Found	Not Found	Not Found	Not Found	Not Found	Not Found	Not Found	Not Found	Not Found	Not Found	Not Found	Not Found	Not Found	Not Found	Not Found	Not Found	Peak Found	High	High
P02765	Alpha-2-HS-glycoprotein [OS=Homo sapiens]	37.925	7	249	4	High	High	High	High	High	High	High	High	High	High	High	High	High	High	High	High	High	High	High	High	High	High	High	High	High	High	Carbamyl [K144; K225]
P02768-1	Serum albumin [OS=Homo sapiens]	155.988	18	1387	9	High	High	High	High	High	High	High	High	High	High	High	High	High	High	High	High	High	High	High	High	High	High	High	High	High	High	Acetyl [K438]; Carbamyl [K438]
P02771	Alpha-fetoprotein [OS=Homo sapiens]	48.701	9	22	4	Peak Found	Peak Found	Peak Found	Not Found	Peak Found	Peak Found	Peak Found	Peak Found	Peak Found	Peak Found	Peak Found	High	High	High	Peak Found	Peak Found	Peak Found	Peak Found	Peak Found	Peak Found	Peak Found	Peak Found	Peak Found	High	High	High
P02774	vitamin D-binding protein [OS=Homo sapiens]	120.415	12	53	6	Not Found	Peak Found	Not Found	Not Found	Not Found	Not Found	Not Found	Not Found	Peak Found	Not Found	Peak Found	High	High	High	High	Peak Found	Not Found	High	High	Peak Found	Not Found	Not Found	Not Found	High	High	High
P02787	Serotransferrin [OS=Homo sapiens]	25.521	8	24	6	Peak Found	Peak Found	Peak Found	Peak Found	Peak Found	Peak Found	High	Peak Found	High	High	Peak Found	Peak Found	Peak Found	Peak Found	Peak Found	Peak Found	Peak Found	Peak Found	Peak Found	Peak Found	High	Peak Found	Peak Found	High	High	High
P02788	Lactotransferrin [OS=Homo sapiens]	11.624	3	89	2	High	High	Peak Found	Peak Found	Peak Found	Peak Found	High	High	High	High	High	High	High	High	High	High	High	High	High	Peak Found	High	High	High	High	High	High
P02792	Ferritin light chain [OS=Homo sapiens]	26.052	37	16	4	Not Found	Not Found	Not Found	Not Found	Not Found	Not Found	High	High	High	Peak Found	High	Peak Found	Peak Found	Peak Found	High	High	Peak Found	Peak Found	Peak Found	Peak Found	Peak Found	Peak Found	Peak Found	High	Peak Found	Peak Found
P03956	Interstitial collagenase [OS=Homo sapiens]	68.113	32	68	13	Peak Found	Peak Found	Peak Found	Peak Found	Peak Found	Peak Found	Peak Found	Not Found	Peak Found	Peak Found	Not Found	High	High	High	Peak Found	Peak Found	Peak Found	Not Found	Not Found	Not Found	High	High	High	Not Found	Not Found	Not Found
P03989	HLA class I histocompatibility antigen, B-27 alpha chain [OS=Homo sapiens]	97.711	40	181	0	Not Found	Not Found	Not Found	Not Found	Not Found	Not Found	Not Found	Not Found	Not Found	Not Found	Not Found	Not Found	Not Found	Not Found	Not Found	Not Found	Not Found	Not Found	Not Found	Not Found	Not Found	Not Found	Not Found	Not Found	Not Found	Not Found
P04004	Vitronectin [OS=Homo sapiens]	11.847	3	14	1	Not Found	Not Found	Not Found	Not Found	Not Found	Not Found	High	High	Peak Found	High	Peak Found	High	High	High	Peak Found	Peak Found	Peak Found	Peak Found	Peak Found	Peak Found	Not Found	Not Found	Not Found	High	High	High
P04040	catalase [OS=Homo sapiens]	168.485	52	279	18	High	High	High	High	Peak Found	High	High	High	High	High	High	High	High	High	High	High	High	High	High	High	High	High	High	High	High	High	Met-loss+Acetyl [N-Term]
P04062	glucosylceramidase [OS=Homo sapiens]	148.034	48	204	16	High	High	High	Peak Found	High	Peak Found	High	High	High	High	High	High	High	High	High	High	High	High	High	High	High	High	High	High	High	High
P04075	fructose-bisphosphate aldolase A [OS=Homo sapiens]	1089.92	96	4551	37	High	High	High	High	High	High	High	High	High	High	High	High	High	High	High	High	High	High	High	High	High	High	High	High	High	High	Carbamyl [K28; K153; K230; K294; K330]; Acetyl [K342]; Met-loss [N-Term]
P04080	Cystatin-B [OS=Homo sapiens]	166.309	86	326	6	High	High	High	High	High	High	High	High	High	High	High	High	High	High	High	High	High	High	High	High	High	High	High	High	High	High	Acetyl [N-Term]
P04083	annexin A1 [OS=Homo sapiens]	705.161	78	3090	29	High	High	High	High	High	High	High	High	High	High	High	High	High	High	High	High	High	High	High	High	High	High	High	High	High	High	Carbamyl [K29; K71; K90; K98; K113; K214; K274]; Acetyl [K29; K214]; Met-loss+Acetyl [N-Term]
P04114	apolipoprotein B-100 [OS=Homo sapiens]	5.801	0	3	2	Peak Found	High	Peak Found	Not Found	Not Found	Not Found	Peak Found	Peak Found	Peak Found	Peak Found	High	Peak Found	High	Peak Found	Peak Found	Not Found	Peak Found	Peak Found	Peak Found	Peak Found	Peak Found	Peak Found	Peak Found	Not Found	Not Found	Not Found
P04150	Glucocorticoid receptor [OS=Homo sapiens]	11.14	4	15	2	High	Peak Found	High	Peak Found	Peak Found	Peak Found	Peak Found	High	High	Peak Found	High	High	High	High	Peak Found	High	High	High	High	High	Peak Found	Peak Found	Peak Found	Peak Found	Peak Found	Peak Found
P04156-1	Major prion protein [OS=Homo sapiens]	8.991	8	40	2	High	High	High	Not Found	Peak Found	Peak Found	High	High	High	High	High	High	High	High	High	High	High	High	High	High	High	High	High	High	High	High
P04181-1	Ornithine aminotransferase, mitochondrial [OS=Homo sapiens]	242.198	77	508	22	High	High	High	High	High	High	High	High	High	High	High	High	High	High	High	High	High	High	High	High	High	High	High	High	High	High
P04216	Thy-1 membrane glycoprotein [OS=Homo sapiens]	93.028	25	283	4	High	High	High	High	High	High	High	High	High	High	High	High	High	High	High	High	High	High	High	High	High	High	High	High	High	High	Carbamyl [K60]
P04259	keratin, type II cytoskeletal 6B [OS=Homo sapiens]	38.723	15	143	2	High	High	High	High	High	Peak Found	High	High	High	High	High	High	High	High	High	High	High	High	High	High	Peak Found	High	High	High	High	High
P04264	Keratin, type II cytoskeletal 1 [OS=Homo sapiens]	322.997	57	529	30	High	High	High	High	High	High	High	High	High	High	High	High	High	High	High	High	High	High	High	High	High	High	High	High	High	High
P04350	Tubulin beta-4A chain [OS=Homo sapiens]	966.939	76	6820	2	Peak Found	Peak Found	Peak Found	Peak Found	Peak Found	Peak Found	High	High	High	High	High	High	High	High	High	High	High	High	High	High	High	High	High	High	High	High	Acetyl [K122; K216]; Carbamyl [K122; K216; K252]
P04406-1	glyceraldehyde-3-phosphate dehydrogenase [OS=Homo sapiens]	1707.66	97	11972	45	High	High	High	High	High	High	High	High	High	High	High	High	High	High	High	High	High	High	High	High	High	High	High	High	High	High	Acetyl [K66; K186]; Carbamyl [K3; K5; K55; K61; K66; K86; K117; K162; K186; K194; K215; K219; K227; K251; K254; K259; K263; K271; K309; K334]; Met-loss [N-Term]
P04424	argininosuccinate lyase [OS=Homo sapiens]	46.561	16	45	5	High	High	High	High	High	Peak Found	High	High	High	High	High	High	High	High	Peak Found	High	High	High	High	High	High	High	High	High	High	High
P04439	HLA class I histocompatibility antigen, A-3 alpha chain [OS=Homo sapiens]	224.365	68	339	2	Peak Found	Peak Found	Peak Found	Not Found	Not Found	Not Found	High	High	Not Found	Not Found	Not Found	Not Found	Not Found	Not Found	Not Found	Not Found	Not Found	Not Found	Not Found	Not Found	High	High	High	Not Found	Not Found	Not Found
P04632	Calpain small subunit 1 [OS=Homo sapiens]	446.781	75	766	11	High	High	High	High	High	High	High	High	High	High	High	High	High	High	High	High	High	High	High	High	High	High	High	High	High	High	Met-loss [N-Term]; Acetyl [N-Term]
P04792	Heat shock protein beta-1 [OS=Homo sapiens]	435.143	90	1574	19	High	High	High	High	High	High	High	High	High	High	High	High	High	High	High	High	High	High	High	High	High	High	High	High	High	High	Carbamyl [K114; K123; K141]
P04818	thymidylate synthase [OS=Homo sapiens]	23.033	19	15	4	High	High	High	Peak Found	Peak Found	Peak Found	Peak Found	Peak Found	High	High	High	Peak Found	Peak Found	Not Found	Not Found	Peak Found	Peak Found	High	High	High	High	Peak Found	High	Not Found	Not Found	Not Found	Met-loss [N-Term]
P04843	Dolichyl-diphosphooligosaccharide--protein glycosyltransferase subunit 1 [OS=Homo sapiens]	328.096	59	898	30	High	High	High	High	High	High	High	High	High	High	High	High	High	High	High	High	High	High	High	High	High	High	High	High	High	High
P04844-1	Dolichyl-diphosphooligosaccharide--protein glycosyltransferase subunit 2 [OS=Homo sapiens]	457.212	68	649	25	High	High	High	High	High	High	High	High	High	High	High	High	High	High	High	High	High	High	High	High	High	High	High	High	High	High
P04899-1	guanine nucleotide-binding protein G(i) subunit alpha-2 [OS=Homo sapiens]	278.123	61	516	12	High	High	High	Peak Found	Peak Found	Peak Found	High	High	High	High	High	High	High	High	High	High	High	High	High	High	High	High	High	High	High	High
P04921-1	Glycophorin-C [OS=Homo sapiens]	11.988	20	8	1	Not Found	Not Found	Not Found	Not Found	Not Found	Not Found	High	High	High	Peak Found	Peak Found	High	Peak Found	High	Not Found	Not Found	Not Found	High	Peak Found	High	Peak Found	Peak Found	Peak Found	Not Found	Not Found	Not Found
P05023	Sodium/potassium-transporting ATPase subunit alpha-1 [OS=Homo sapiens]	336.392	41	698	20	High	High	High	High	High	High	High	High	High	High	High	High	High	High	High	High	High	High	High	High	High	High	High	High	High	High	Carbamyl [K535]
P05062	fructose-bisphosphate aldolase B [OS=Homo sapiens]	12.323	9	213	1	Not Found	Not Found	Not Found	Not Found	Not Found	Not Found	Not Found	Not Found	Not Found	Not Found	Not Found	Not Found	Not Found	Not Found	Not Found	Not Found	Not Found	Not Found	Not Found	Not Found	Not Found	High	Not Found	Not Found	Not Found	Not Found
P05067-1	Amyloid-beta A4 protein [OS=Homo sapiens]	20.374	7	36	5	High	High	High	High	High	Not Found	High	High	High	Peak Found	High	High	High	High	Peak Found	Peak Found	High	High	High	High	High	High	Peak Found	High	High	High	Acetyl [K425; K428]; Carbamyl [K421]
P05091	Aldehyde dehydrogenase, mitochondrial [OS=Homo sapiens]	152.41	55	248	18	High	High	High	Peak Found	Peak Found	Peak Found	High	High	High	High	High	High	High	High	High	High	High	High	High	High	High	High	High	High	High	High
P05106	Integrin beta-3 [OS=Homo sapiens]	4.107	1	21	1	Peak Found	High	High	Peak Found	Peak Found	Peak Found	Peak Found	High	High	High	High	High	High	High	High	Peak Found	High	Peak Found	High	Peak Found	Peak Found	High	Peak Found	High	High	High
P05114	Non-histone chromosomal protein HMG-14 [OS=Homo sapiens]	85.878	51	144	8	High	High	High	High	High	High	High	High	High	High	High	High	High	High	High	High	High	High	High	High	High	High	High	High	High	High
P05121-1	Plasminogen activator inhibitor 1 [OS=Homo sapiens]	108.343	46	105	11	Peak Found	Peak Found	Peak Found	Peak Found	Peak Found	Peak Found	Peak Found	Peak Found	High	High	High	High	High	High	High	High	High	High	High	High	High	Peak Found	Peak Found	High	High	High
P05141	ADP/ATP translocase 2 [OS=Homo sapiens]	126.317	50	686	6	High	High	High	High	High	High	High	High	High	High	High	High	High	High	High	High	High	High	High	High	High	High	High	High	High	High	Met-loss+Acetyl [N-Term]
P05161	Ubiquitin-like protein ISG15 [OS=Homo sapiens]	50.428	49	66	7	High	High	High	Peak Found	Peak Found	Peak Found	High	High	High	High	High	High	High	High	High	High	High	High	High	High	High	High	High	High	High	High	Met-loss [N-Term]
P05166-1	propionyl-CoA carboxylase beta chain, mitochondrial [OS=Homo sapiens]	9.138	4	2	1	Not Found	Not Found	Not Found	Not Found	Not Found	Not Found	High	High	Peak Found	Peak Found	Peak Found	Peak Found	Peak Found	Peak Found	Not Found	Not Found	Not Found	Peak Found	Peak Found	Peak Found	Not Found	Not Found	Not Found	Not Found	Peak Found	Peak Found
P05198	Eukaryotic translation initiation factor 2 subunit 1 [OS=Homo sapiens]	164.092	61	392	18	High	High	High	High	High	High	High	High	High	High	High	High	High	High	High	High	High	High	High	High	High	High	High	High	High	High
P05204	Non-histone chromosomal protein HMG-17 [OS=Homo sapiens]	108.901	53	254	5	High	High	High	High	High	High	High	High	High	High	High	High	High	High	High	High	High	High	High	High	High	High	High	High	High	High	Carbamyl [K31; K40]
P05230-1	Fibroblast growth factor 1 [OS=Homo sapiens]	5.558	8	11	1	Not Found	Not Found	Not Found	Not Found	Not Found	Not Found	Peak Found	Peak Found	High	High	High	High	High	High	Peak Found	High	Peak Found	Peak Found	High	Peak Found	Not Found	Not Found	Peak Found	High	High	High
P05362	Intercellular adhesion molecule 1 [OS=Homo sapiens]	38.587	19	42	7	High	Peak Found	High	Peak Found	Not Found	Not Found	High	High	High	High	High	Peak Found	Peak Found	Peak Found	Peak Found	Peak Found	Peak Found	Peak Found	Peak Found	Peak Found	High	High	High	High	High	High
P05387	60S acidic ribosomal protein P2 [OS=Homo sapiens]	281.975	81	820	9	High	High	High	High	High	High	High	High	High	High	High	High	High	High	High	High	High	High	High	High	High	High	High	High	High	High	Carbamyl [K25]
P05388	60S acidic ribosomal protein P0 [OS=Homo sapiens]	281.422	59	1034	7	High	High	High	High	High	High	High	High	High	High	High	High	High	High	High	High	High	High	High	High	High	High	High	High	High	High
P05413	Fatty acid-binding protein, heart [OS=Homo sapiens]	33.722	45	51	6	Peak Found	Peak Found	Peak Found	Peak Found	Peak Found	Peak Found	Peak Found	Peak Found	Peak Found	Peak Found	High	High	High	High	High	High	High	High	High	High	Peak Found	Peak Found	Peak Found	High	High	High	Met-loss+Acetyl [N-Term]; Acetyl [N-Term]
P05452	Tetranectin [OS=Homo sapiens]	25.247	30	6	3	Not Found	Not Found	Not Found	Not Found	Not Found	Not Found	Not Found	Not Found	Not Found	Not Found	Not Found	Not Found	Not Found	Not Found	Not Found	Not Found	Not Found	Not Found	Not Found	Not Found	Not Found	Not Found	Not Found	High	High	High
P05455	Lupus La protein [OS=Homo sapiens]	218.526	65	508	29	High	High	High	High	High	High	High	High	High	High	High	High	High	High	High	High	High	High	High	High	High	High	High	High	High	High	Carbamyl [K317]
P05543	thyroxine-binding globulin [OS=Homo sapiens]	9.175	6	8	2	Not Found	Not Found	Not Found	Not Found	Not Found	Not Found	Not Found	Not Found	Not Found	Not Found	Not Found	Not Found	Not Found	Not Found	Not Found	Not Found	Not Found	Not Found	Not Found	Not Found	Not Found	Not Found	Not Found	High	High	High
P05546	Heparin cofactor 2 [OS=Homo sapiens]	4.749	4	2	1	Not Found	Not Found	Not Found	Not Found	Not Found	Not Found	Not Found	Not Found	Not Found	Not Found	Not Found	Not Found	Not Found	Not Found	Not Found	Not Found	Not Found	Not Found	Not Found	Not Found	Not Found	Not Found	Not Found	Peak Found	High	High
P05549-2	Isoform 4 of Transcription factor AP-2-alpha [OS=Homo sapiens]	4.454	6	2	2	Peak Found	Peak Found	Peak Found	High	Peak Found	Peak Found	Peak Found	Peak Found	Peak Found	Peak Found	Peak Found	Peak Found	Peak Found	Peak Found	Peak Found	High	Peak Found	Peak Found	Peak Found	Peak Found	Peak Found	Peak Found	Peak Found	Peak Found	Peak Found	Peak Found	Acetyl [K296]
P05556-1	Integrin beta-1 [OS=Homo sapiens]	479.784	45	1441	28	High	High	High	High	High	High	High	High	High	High	High	High	High	High	High	High	High	High	High	High	High	High	High	High	High	High	Carbamyl [K107; K678]
P05783	Keratin, type I cytoskeletal 18 [OS=Homo sapiens]	172.695	67	230	21	High	High	High	High	High	High	High	High	High	High	High	High	High	High	High	High	High	High	High	High	High	High	High	High	High	High
P05787	Keratin, type II cytoskeletal 8 [OS=Homo sapiens]	93.419	44	557	10	High	High	High	High	High	High	Peak Found	Peak Found	Peak Found	Not Found	Peak Found	High	Peak Found	Peak Found	High	Not Found	Peak Found	High	High	High	High	Peak Found	High	Not Found	Peak Found	Peak Found	Carbamyl [K393]
P05997	Collagen alpha-2(V) chain [OS=Homo sapiens]	85.677	12	114	11	High	High	High	Not Found	Not Found	Not Found	High	High	High	High	High	High	High	High	High	High	High	High	High	High	High	High	High	Not Found	High	High
P06132	Uroporphyrinogen decarboxylase [OS=Homo sapiens]	126.11	55	220	12	High	High	High	High	High	Peak Found	High	High	High	High	High	High	High	High	High	High	High	High	High	High	High	High	High	High	High	High	Acetyl [N-Term]
P06280	alpha-galactosidase A [OS=Homo sapiens]	48.585	31	33	9	Peak Found	Peak Found	Peak Found	Not Found	Not Found	Not Found	High	Peak Found	Peak Found	Peak Found	Peak Found	Peak Found	High	Peak Found	Peak Found	High	Peak Found	High	Peak Found	Peak Found	Peak Found	High	Peak Found	High	High	High
P06396-2	Isoform 2 of Gelsolin [OS=Homo sapiens]	974.321	70	2089	1	High	Peak Found	Peak Found	Not Found	Peak Found	Peak Found	High	Peak Found	High	High	High	High	High	Peak Found	High	High	High	High	High	High	High	High	High	High	Peak Found	High	Carbamyl [K406]; Met-loss [N-Term]; Acetyl [N-Term]
P06396-3	Isoform 3 of Gelsolin [OS=Homo sapiens]	967.273	70	2061	1	Peak Found	Peak Found	Peak Found	Not Found	Not Found	Not Found	Peak Found	Peak Found	Peak Found	Peak Found	Peak Found	Peak Found	Peak Found	Peak Found	Peak Found	Peak Found	High	Peak Found	Not Found	Peak Found	Peak Found	Peak Found	Peak Found	High	High	High	Carbamyl [K417]
P06454-1	Prothymosin alpha [OS=Homo sapiens]	126.44	39	715	8	High	High	High	High	High	High	High	High	High	High	High	High	High	High	High	High	High	High	High	High	High	High	High	High	High	High	Carbamyl [K21]; Met-loss+Acetyl [N-Term]
P06493	Cyclin-dependent kinase 1 [OS=Homo sapiens]	40.458	36	35	7	High	High	High	Not Found	Not Found	Peak Found	Peak Found	Peak Found	High	High	High	Peak Found	Peak Found	Peak Found	Peak Found	High	High	Peak Found	Peak Found	High	High	High	High	Not Found	Not Found	Not Found
P06576	ATP synthase subunit beta, mitochondrial [OS=Homo sapiens]	932.988	81	2647	30	High	High	High	High	High	High	High	High	High	High	High	High	High	High	High	High	High	High	High	High	High	High	High	High	High	High	Acetyl [K351]; Carbamyl [K351]
P06703	protein S100-A6 [OS=Homo sapiens]	82.755	83	320	10	High	High	High	High	High	High	High	High	High	High	High	High	High	High	High	High	High	High	High	High	High	High	High	High	High	High	Met-loss [N-Term]; Met-loss+Acetyl [N-Term]
P06730	Eukaryotic translation initiation factor 4E [OS=Homo sapiens]	47.004	35	169	5	High	High	High	High	High	High	High	High	High	High	High	High	High	High	High	High	High	High	High	High	High	High	High	High	High	High	Met-loss+Acetyl [N-Term]; Acetyl [K21]; Met-loss [N-Term]; Carbamyl [K21]
P06733-1	alpha-enolase [OS=Homo sapiens]	1205.35	87	6291	41	High	High	High	High	High	High	High	High	High	High	High	High	High	High	High	High	High	High	High	High	High	High	High	High	High	High	Carbamyl [K28; K81; K103; K120; K126; K221; K239; K343; K406]; Acetyl [K103; K105; K162; K221; K343; K394]
P06737-1	Glycogen phosphorylase, liver form [OS=Homo sapiens]	182.589	41	322	18	High	High	Peak Found	Peak Found	Peak Found	Peak Found	High	High	High	High	High	High	High	High	High	High	High	High	High	High	High	High	High	High	High	High
P06744	glucose-6-phosphate isomerase [OS=Homo sapiens]	480.262	61	1158	29	High	High	High	High	High	High	High	High	High	High	High	High	High	High	High	High	High	High	High	High	High	High	High	High	High	High	Acetyl [K524]; Carbamyl [K524]; Met-loss+Acetyl [N-Term]
P06748	Nucleophosmin [OS=Homo sapiens]	601.645	71	1678	20	High	High	High	High	High	High	High	High	High	High	High	High	High	High	High	High	High	High	High	High	High	High	High	High	High	High	Carbamyl [K27; K32; K54]; Acetyl [N-Term]; Acetyl [K54]
P06753	Tropomyosin alpha-3 chain [OS=Homo sapiens]	338.126	55	1504	2	High	High	High	Not Found	Not Found	Not Found	Peak Found	High	High	High	High	High	High	High	High	Peak Found	High	Peak Found	High	High	High	High	High	Peak Found	High	Peak Found	Carbamyl [K113; K119; K169]; Acetyl [K113]
P06753-2	Isoform 2 of Tropomyosin alpha-3 chain [OS=Homo sapiens]	519.995	83	2390	21	High	High	High	High	High	High	High	High	High	High	High	High	High	High	High	High	High	High	High	High	High	High	High	High	High	High	Acetyl [K13; K76]; Carbamyl [K13; K76; K82; K132]; Met-loss+Acetyl [N-Term]
P06756	Integrin alpha-V [OS=Homo sapiens]	217.04	42	347	32	High	High	High	High	High	High	High	High	High	High	High	High	High	High	High	High	High	High	High	High	High	High	High	High	High	High
P06865	Beta-hexosaminidase subunit alpha [OS=Homo sapiens]	84.465	28	99	9	Peak Found	High	High	Not Found	Not Found	Not Found	High	High	High	High	High	High	High	High	High	High	High	High	High	High	Peak Found	High	High	High	High	High
P07099	epoxide hydrolase 1 [OS=Homo sapiens]	107.81	40	105	12	High	High	High	Not Found	Not Found	Peak Found	High	High	High	High	High	High	Peak Found	High	High	High	High	High	High	High	High	High	High	High	High	High
P07108	acyl-CoA-binding protein [OS=Homo sapiens]	51.05	75	106	6	High	High	High	High	High	High	High	High	High	High	High	High	High	High	High	High	High	High	High	High	High	High	High	High	High	High	Met-loss+Acetyl [N-Term]; Carbamyl [K19]
P07195	L-lactate dehydrogenase B chain [OS=Homo sapiens]	483.889	69	1675	25	High	High	High	High	High	High	High	High	High	High	High	High	High	High	High	High	High	High	High	High	High	High	High	High	High	High	Carbamyl [K310]
P07197	Neurofilament medium polypeptide [OS=Homo sapiens]	260.162	45	918	32	Peak Found	Peak Found	Peak Found	Peak Found	Peak Found	Peak Found	Peak Found	Peak Found	Peak Found	Peak Found	Peak Found	Peak Found	Peak Found	Peak Found	High	High	High	Peak Found	Peak Found	Peak Found	High	High	High	Peak Found	Peak Found	Peak Found	Met-loss+Acetyl [N-Term]
P07203	Glutathione peroxidase 1 [OS=Homo sapiens]	71.607	80	112	10	High	High	High	Peak Found	Peak Found	Peak Found	High	High	High	High	High	High	High	High	High	High	High	High	High	High	High	High	High	Peak Found	Peak Found	High
P07205	Phosphoglycerate kinase 2 [OS=Homo sapiens]	141.738	23	389	1	Not Found	Not Found	Not Found	Not Found	Not Found	Not Found	High	Not Found	Not Found	Not Found	Not Found	Not Found	High	Not Found	Not Found	Not Found	High	High	Not Found	Not Found	Not Found	Not Found	Not Found	Not Found	Not Found	High	Carbamyl [K75]; Acetyl [K388]
P07237	Protein disulfide-isomerase [OS=Homo sapiens]	1005.05	84	3502	56	High	High	High	High	High	High	High	High	High	High	High	High	High	High	High	High	High	High	High	High	High	High	High	High	High	High	Carbamyl [K31; K328; K352; K409]
P07305	Histone H1.0 [OS=Homo sapiens]	41.32	23	122	4	High	High	High	High	High	High	High	High	High	High	High	High	High	High	High	High	High	High	High	High	High	High	High	High	High	High	Met-loss [N-Term]; Met-loss+Acetyl [N-Term]; Acetyl [N-Term]
P07311	Acylphosphatase-1 [OS=Homo sapiens]	11.504	30	18	2	High	High	High	Peak Found	Peak Found	Peak Found	Peak Found	Peak Found	Peak Found	Peak Found	Peak Found	Peak Found	High	High	High	High	High	High	Peak Found	High	High	High	High	Peak Found	Peak Found	Peak Found	Met-loss+Acetyl [N-Term]
P07339	Cathepsin D [OS=Homo sapiens]	427.19	56	980	19	High	High	High	High	High	High	High	High	High	High	High	High	High	High	High	High	High	High	High	High	High	High	High	High	High	High
P07355	Annexin A2 [OS=Homo sapiens]	872.956	84	5004	43	High	High	High	High	High	High	High	High	High	High	High	High	High	High	High	High	High	High	High	High	High	High	High	High	High	High	Carbamyl [K49; K88; K104; K157; K249]; Acetyl [K28; K49; K104; K157; K249]; Met-loss+Acetyl [N-Term]
P07384	Calpain-1 catalytic subunit [OS=Homo sapiens]	331.859	64	688	36	High	High	High	High	High	High	High	High	High	High	High	High	High	High	High	High	High	High	High	High	High	High	High	High	High	High	Met-loss+Acetyl [N-Term]
P07437	tubulin beta chain [OS=Homo sapiens]	1168.73	83	8703	6	High	High	High	High	High	High	High	High	High	High	High	High	High	High	High	High	High	High	High	High	High	High	High	High	High	High	Acetyl [K122; K216; K324; K336]; Carbamyl [K122; K216; K252; K336; K379]
P07477	Trypsin-1 [OS=Homo sapiens]	11.637	7	68	2	High	High	High	High	High	High	High	High	High	High	High	High	High	High	High	High	High	High	High	High	High	High	High	Peak Found	High	High
P07585	decorin [OS=Homo sapiens]	27.019	16	16	3	High	High	High	Not Found	Not Found	Not Found	High	High	Peak Found	Peak Found	Not Found	High	High	High	Not Found	Peak Found	Peak Found	Peak Found	Peak Found	Peak Found	Peak Found	Peak Found	Peak Found	Peak Found	Peak Found	Peak Found
P07602-1	Prosaposin [OS=Homo sapiens]	76.709	26	172	10	High	High	High	Peak Found	High	Peak Found	High	High	High	High	High	High	High	High	High	High	High	High	High	High	High	High	High	High	High	High
P07686	Beta-hexosaminidase subunit beta [OS=Homo sapiens]	283.42	46	492	22	High	High	High	High	High	High	High	High	High	High	High	High	High	High	High	High	High	High	High	High	High	High	High	High	High	High
P07711	Cathepsin L1 [OS=Homo sapiens]	81.614	40	228	7	High	High	High	High	High	High	High	High	High	High	High	High	High	High	High	High	High	High	High	High	High	High	High	High	High	High
P07737	profilin-1 [OS=Homo sapiens]	353.631	94	3209	19	High	High	High	High	High	High	High	High	High	High	High	High	High	High	High	High	High	High	High	High	High	High	High	High	High	High	Acetyl [K38]; Carbamyl [K38; K54; K105; K108; K126; K127]; Met-loss+Acetyl [N-Term]
P07738	Bisphosphoglycerate mutase [OS=Homo sapiens]	18.563	24	24	3	Not Found	Peak Found	Peak Found	Not Found	Not Found	Not Found	High	High	Peak Found	High	Not Found	High	High	High	High	High	High	High	High	Peak Found	High	Peak Found	Peak Found	High	High	High
P07741-1	Adenine phosphoribosyltransferase [OS=Homo sapiens]	199.92	82	346	11	High	High	High	High	High	High	High	High	High	High	High	High	High	High	High	High	High	High	High	High	High	High	High	High	High	High	Met-loss+Acetyl [N-Term]
P07814	Bifunctional glutamate/proline--tRNA ligase [OS=Homo sapiens]	591.81	58	1394	64	High	High	High	High	High	High	High	High	High	High	High	High	High	High	High	High	High	High	High	High	High	High	High	High	High	High
P07858	Cathepsin B [OS=Homo sapiens]	524.548	54	1262	19	High	High	High	High	High	High	High	High	High	High	High	High	High	High	High	High	High	High	High	High	High	High	High	High	High	High	Carbamyl [K223]
P07900	Heat shock protein HSP 90-alpha [OS=Homo sapiens]	907.562	68	3768	32	High	High	High	High	High	High	High	High	High	High	High	High	High	High	High	High	High	High	High	High	High	High	High	High	High	High	Carbamyl [K283; K632]; Acetyl [K632]
P07910-1	Heterogeneous nuclear ribonucleoproteins C1/C2 [OS=Homo sapiens]	230.015	55	1044	1	High	High	High	High	High	High	High	High	High	High	High	High	High	High	Peak Found	High	High	High	High	High	High	High	High	Not Found	Peak Found	Not Found	Carbamyl [K189]; Met-loss+Acetyl [N-Term]
P07910-2	Isoform C1 of Heterogeneous nuclear ribonucleoproteins C1/C2 [OS=Homo sapiens]	224.465	55	1082	3	High	High	High	Not Found	Not Found	Not Found	High	High	High	High	High	High	High	High	High	High	High	High	High	High	High	High	High	High	High	High	Carbamyl [K176]; Met-loss+Acetyl [N-Term]
P07919	Cytochrome b-c1 complex subunit 6, mitochondrial [OS=Homo sapiens]	19.953	29	44	2	Peak Found	High	High	High	High	High	High	High	High	High	High	High	Peak Found	High	High	High	High	High	High	High	High	Peak Found	Peak Found	High	High	High
P07942	Laminin subunit beta-1 [OS=Homo sapiens]	222.349	22	361	25	High	High	High	High	High	High	High	High	High	High	High	High	High	High	High	High	High	High	High	High	High	High	High	High	High	High
P07947	tyrosine-protein kinase Yes [OS=Homo sapiens]	4.333	3	12	1	Not Found	Not Found	Not Found	Not Found	Not Found	Not Found	High	Peak Found	Peak Found	Peak Found	Peak Found	Peak Found	High	Peak Found	Peak Found	Peak Found	Peak Found	Peak Found	Peak Found	High	Peak Found	Peak Found	High	Not Found	Peak Found	Peak Found
P07951-1	Tropomyosin beta chain [OS=Homo sapiens]	529.377	79	2394	17	High	High	High	High	High	High	High	High	High	High	High	High	High	High	High	High	High	High	High	High	High	High	High	High	High	High	Carbamyl [K77; K112; K118; K136; K168]; Acetyl [K112]
P07951-3	Isoform 3 of Tropomyosin beta chain [OS=Homo sapiens]	342.009	67	1561	8	High	High	High	High	High	High	High	High	High	High	High	High	High	High	High	High	High	High	High	High	High	High	High	High	High	High	Carbamyl [K76; K82; K100; K132]; Acetyl [K76]
P07954	fumarate hydratase, mitochondrial [OS=Homo sapiens]	266.685	62	465	20	High	High	High	High	High	High	High	High	High	High	High	High	High	High	High	High	High	High	High	High	High	High	High	High	High	High
P07996	thrombospondin-1 [OS=Homo sapiens]	341.376	41	686	38	High	High	High	Peak Found	Peak Found	Peak Found	High	High	High	High	High	High	High	High	High	High	High	High	High	High	High	High	High	High	High	High
P08047	Transcription factor Sp1 [OS=Homo sapiens]	7.993	4	2	1	Not Found	Not Found	Not Found	Not Found	Not Found	Not Found	Not Found	Not Found	Not Found	Not Found	Not Found	Not Found	Not Found	Not Found	Not Found	Not Found	Not Found	Not Found	Not Found	Not Found	Not Found	High	Not Found	Not Found	Not Found	Not Found
P08123	Collagen alpha-2(I) chain [OS=Homo sapiens]	588.206	61	1503	54	High	High	High	High	High	High	High	High	High	High	High	High	High	High	High	High	High	High	High	High	High	High	High	High	High	High
P08133-1	annexin A6 [OS=Homo sapiens]	911.71	81	3203	61	High	High	High	High	High	High	High	High	High	High	High	High	High	High	High	High	High	High	High	High	High	High	High	High	High	High	Carbamyl [K102]
P08134	Rho-related GTP-binding protein RhoC [OS=Homo sapiens]	205.587	69	545	2	High	High	High	Not Found	Not Found	High	High	High	High	High	High	High	High	High	High	High	High	High	High	High	High	High	High	High	High	High
P08172	muscarinic acetylcholine receptor m2 [OS=Homo sapiens]	3.78	4	4	1	Peak Found	Peak Found	Peak Found	Not Found	Not Found	Not Found	High	High	Peak Found	Peak Found	Peak Found	Not Found	Not Found	Not Found	Not Found	Not Found	Not Found	Not Found	Not Found	Not Found	Not Found	High	Peak Found	Not Found	Not Found	Not Found
P08174-1	Complement decay-accelerating factor [OS=Homo sapiens]	3.053	7	1	1	Not Found	Not Found	Not Found	Not Found	Not Found	High	Not Found	Not Found	Not Found	Not Found	Not Found	Not Found	Not Found	Not Found	Not Found	Not Found	Not Found	Not Found	Not Found	Not Found	Not Found	Not Found	Not Found	Not Found	Not Found	Not Found
P08195-2	Isoform 2 of 4F2 cell-surface antigen heavy chain [OS=Homo sapiens]	193.193	54	342	23	High	High	High	High	High	High	High	High	High	High	High	High	High	High	High	High	High	High	High	High	High	High	High	High	High	High	Carbamyl [K10]; Met-loss [N-Term]
P08237	ATP-dependent 6-phosphofructokinase, muscle type [OS=Homo sapiens]	115.194	27	150	12	High	High	High	Not Found	Not Found	Peak Found	High	High	High	High	High	High	High	High	High	High	High	High	High	High	High	High	High	High	High	High
P08238	Heat shock protein HSP 90-beta [OS=Homo sapiens]	1130.74	69	4287	33	High	High	High	High	High	High	High	High	High	High	High	High	High	High	High	High	High	High	High	High	High	High	High	High	High	High	Carbamyl [K72; K275; K624]; Acetyl [K624]
P08240-1	signal recognition particle receptor subunit alpha [OS=Homo sapiens]	142.773	42	272	17	High	High	High	Not Found	Peak Found	Peak Found	High	High	High	High	High	High	High	High	High	High	High	High	High	High	High	High	High	High	High	High
P08243-1	Asparagine synthetase [glutamine-hydrolyzing] [OS=Homo sapiens]	118.968	35	183	12	High	High	High	Peak Found	High	High	High	High	High	High	High	High	High	High	High	High	High	High	High	High	High	High	High	Peak Found	Peak Found	High
P08253	72 kDa type IV collagenase [OS=Homo sapiens]	32.845	17	15	5	Peak Found	Peak Found	High	Not Found	Not Found	Not Found	Peak Found	Peak Found	Peak Found	Peak Found	Peak Found	Not Found	Peak Found	Peak Found	High	High	High	High	High	High	High	High	High	Peak Found	Peak Found	Not Found
P08254	Stromelysin-1 [OS=Homo sapiens]	5.094	5	3	2	Peak Found	High	High	Not Found	Peak Found	Not Found	Peak Found	Not Found	Not Found	Peak Found	Peak Found	Not Found	Not Found	Not Found	Peak Found	Not Found	Not Found	Not Found	Peak Found	Not Found	Not Found	Not Found	Not Found	Not Found	Not Found	Not Found
P08397-1	porphobilinogen deaminase [OS=Homo sapiens]	39.511	31	44	6	Peak Found	Peak Found	Peak Found	Not Found	Not Found	Not Found	High	High	High	High	High	High	High	High	High	High	High	High	High	High	High	High	High	High	High	High
P08559	Pyruvate dehydrogenase E1 component subunit alpha, somatic form, mitochondrial [OS=Homo sapiens]	123.269	45	243	14	High	Peak Found	High	Peak Found	Peak Found	Peak Found	High	High	High	High	High	High	High	High	High	High	High	High	High	High	High	High	High	High	High	High
P08571	Monocyte differentiation antigen CD14 [OS=Homo sapiens]	18.009	14	4	3	Not Found	Not Found	Not Found	Not Found	Not Found	Not Found	High	High	Peak Found	Not Found	Peak Found	Not Found	Not Found	Not Found	Peak Found	Not Found	Peak Found	Not Found	Not Found	Not Found	Not Found	Not Found	Not Found	Not Found	Not Found	Not Found
P08572	Collagen alpha-2(IV) chain [OS=Homo sapiens]	21.384	4	26	5	Peak Found	Peak Found	Peak Found	Not Found	Not Found	Not Found	High	Peak Found	Not Found	Peak Found	Peak Found	High	High	High	Peak Found	Peak Found	Not Found	Peak Found	Peak Found	Peak Found	High	High	High	High	High	High
P08574	Cytochrome c1, heme protein, mitochondrial [OS=Homo sapiens]	59.094	48	142	8	Peak Found	Peak Found	Peak Found	Peak Found	Peak Found	Peak Found	High	High	High	High	High	High	High	High	High	High	High	High	High	High	High	High	High	High	High	High
P08579	U2 small nuclear ribonucleoprotein B'' [OS=Homo sapiens]	37.569	46	95	6	High	High	High	High	High	High	High	High	High	High	High	Peak Found	High	High	High	High	High	High	High	High	High	High	High	Peak Found	Peak Found	Peak Found	Acetyl [N-Term]
P08621-1	U1 small nuclear ribonucleoprotein 70 kDa [OS=Homo sapiens]	93.023	38	218	13	High	High	High	High	High	High	High	High	High	High	High	High	High	High	High	High	High	High	High	High	High	High	High	High	High	High	Met-loss+Acetyl [N-Term]
P08648	Integrin alpha-5 [OS=Homo sapiens]	146.294	29	297	16	High	High	High	High	High	High	High	High	High	High	High	High	High	High	High	High	High	High	High	High	High	High	High	High	High	High
P08651-2	Isoform 1 of Nuclear factor 1 C-type [OS=Homo sapiens]	42.28	14	51	4	High	High	High	Not Found	Peak Found	Not Found	High	High	High	High	High	High	Peak Found	High	High	High	High	High	High	High	High	High	High	Peak Found	Peak Found	Peak Found	Acetyl [N-Term]
P08670	Vimentin [OS=Homo sapiens]	2502.57	93	31141	68	High	High	High	High	High	High	High	High	High	High	High	High	High	High	High	High	High	High	High	High	High	High	High	High	High	High	Carbamyl [K97; K104; K120; K129; K139; K143; K168; K188; K223; K235; K236; K262; K292; K294; K313; K334; K373; K402; K439; K445]; Acetyl [K97; K104; K129; K143; K223; K236; K262]
P08708	40S ribosomal protein S17 [OS=Homo sapiens]	211.439	60	578	11	High	High	High	High	High	High	High	High	High	High	High	High	High	High	High	High	High	High	High	High	High	High	High	High	High	High
P08727	Keratin, type I cytoskeletal 19 [OS=Homo sapiens]	57.995	38	117	10	Peak Found	Peak Found	Peak Found	High	Peak Found	Peak Found	Peak Found	Peak Found	Peak Found	Peak Found	Peak Found	High	Peak Found	Peak Found	High	Peak Found	Peak Found	High	High	High	High	Peak Found	Peak Found	Peak Found	Peak Found	Not Found
P08729	Keratin, type II cytoskeletal 7 [OS=Homo sapiens]	98.377	47	605	15	High	High	High	High	High	High	High	High	Peak Found	Peak Found	Peak Found	Peak Found	Peak Found	Peak Found	High	High	High	High	High	High	High	High	High	High	High	Peak Found	Carbamyl [K394]
P08754	Guanine nucleotide-binding protein G(k) subunit alpha [OS=Homo sapiens]	111.267	44	244	7	High	High	High	High	High	Peak Found	High	High	High	High	High	High	High	High	High	High	High	High	High	High	High	High	High	Not Found	Not Found	Not Found
P08758	annexin A5 [OS=Homo sapiens]	658.984	83	2855	32	High	High	High	High	High	High	High	High	High	High	High	High	High	High	High	High	High	High	High	High	High	High	High	High	High	High	Carbamyl [K70; K76; K86; K101; K290]; Acetyl [K290]
P08865	40S ribosomal protein SA [OS=Homo sapiens]	374.377	64	994	19	High	High	High	High	High	High	High	High	High	High	High	High	High	High	High	High	High	High	High	High	High	High	High	High	High	High	Met-loss+Acetyl [N-Term]
P08962	CD63 antigen [OS=Homo sapiens]	28.539	22	147	5	High	High	High	High	High	High	High	High	High	High	High	High	High	High	High	High	High	High	High	High	High	Peak Found	High	High	High	High
P09001	39S ribosomal protein L3, mitochondrial [OS=Homo sapiens]	6.972	7	16	2	Peak Found	Peak Found	High	Not Found	Not Found	Not Found	High	High	High	High	High	High	High	High	Peak Found	Peak Found	High	Peak Found	High	Peak Found	Peak Found	Peak Found	Peak Found	High	High	High
P09012	U1 SMALL NUCLEAR RIBONUCLEOPROTEIN A [OS=Homo sapiens]	81.371	38	139	6	High	High	High	High	High	High	High	High	High	High	High	High	High	High	High	High	High	High	High	High	High	High	High	High	High	High	Met-loss+Acetyl [N-Term]
P09038-1	Isoform 2 of Fibroblast growth factor 2 [OS=Homo sapiens]	6.787	8	28	2	High	High	High	High	High	Peak Found	Peak Found	High	Peak Found	Peak Found	Peak Found	High	Peak Found	High	High	High	High	Peak Found	High	High	Peak Found	High	High	High	High	High
P09104	Gamma-enolase [OS=Homo sapiens]	265.899	71	1074	13	High	High	High	Peak Found	Peak Found	High	High	High	High	High	High	High	High	High	High	High	High	High	High	High	High	High	High	High	High	High	Acetyl [K394]
P09110-1	3-ketoacyl-CoA thiolase, peroxisomal [OS=Homo sapiens]	214.031	73	250	20	High	High	High	High	High	High	High	High	High	High	High	High	High	High	High	High	High	High	High	High	High	High	High	High	High	High
P09132-1	Signal recognition particle 19 kDa protein [OS=Homo sapiens]	39.198	56	57	6	High	High	High	Peak Found	High	High	High	High	High	High	High	High	High	High	High	High	High	High	High	High	High	High	High	High	High	High
P09211	Glutathione S-transferase P [OS=Homo sapiens]	435.457	71	1079	13	High	High	High	High	High	High	High	High	High	High	High	High	High	High	High	High	High	High	High	High	High	High	High	High	High	High	Acetyl [K128]; Met-loss [N-Term]
P09234	U1 small nuclear ribonucleoprotein C [OS=Homo sapiens]	16.603	19	80	2	Peak Found	Peak Found	Peak Found	Not Found	Not Found	Not Found	High	High	High	High	High	High	High	High	High	High	High	High	High	High	High	High	High	High	High	High
P09382	Galectin-1 [OS=Homo sapiens]	390.005	96	3470	15	High	High	High	High	High	High	High	High	High	High	High	High	High	High	High	High	High	High	High	High	High	High	High	High	High	High	Carbamyl [K29; K64; K108]; Acetyl [K64]; Met-loss [N-Term]; Met-loss+Acetyl [N-Term]
P09417	dihydropteridine reductase [OS=Homo sapiens]	79.891	55	127	10	High	High	High	Peak Found	High	Peak Found	High	High	High	High	High	High	High	High	High	High	High	High	High	High	High	High	High	High	High	High	Met-loss+Acetyl [N-Term]
P09429	High mobility group protein B1 [OS=Homo sapiens]	221.683	69	620	14	High	High	High	High	High	High	High	High	High	High	High	High	High	High	High	High	High	High	High	High	High	High	High	High	High	High	Carbamyl [K30; K128]; Acetyl [K128]
P09486	Sparc [OS=Homo sapiens]	154.784	59	303	12	High	High	High	High	High	High	High	High	High	High	High	High	High	High	High	High	High	High	High	High	High	High	High	High	High	High
P09488	Glutathione S-transferase Mu 1 [OS=Homo sapiens]	56.165	47	103	2	Not Found	Not Found	Not Found	Not Found	Not Found	Not Found	Peak Found	Not Found	Peak Found	Peak Found	Not Found	High	High	High	High	High	High	High	High	High	High	High	High	Peak Found	Peak Found	Peak Found	Met-loss+Acetyl [N-Term]
P09493-10	Isoform 10 of Tropomyosin alpha-1 chain [OS=Homo sapiens]	418.208	69	1660	8	High	High	High	High	High	High	High	High	High	High	High	High	High	High	High	High	High	High	High	High	High	High	High	High	High	High	Carbamyl [K77; K112; K118; K168]; Acetyl [K112]
P09493-5	Isoform 5 of Tropomyosin alpha-1 chain [OS=Homo sapiens]	268.211	64	1145	3	High	High	High	High	High	High	High	High	High	High	High	High	High	High	High	High	High	High	High	High	High	High	High	High	High	High	Carbamyl [K76; K82; K132]; Acetyl [K76]; Met-loss+Acetyl [N-Term]
P09493-7	Isoform 7 of Tropomyosin alpha-1 chain [OS=Homo sapiens]	318.082	76	1242	7	High	High	High	High	High	Peak Found	High	High	High	High	High	High	High	High	High	High	High	High	High	High	High	High	High	High	High	High	Carbamyl [K112; K118; K168]; Acetyl [K112]
P09496-2	Isoform Non-brain of Clathrin light chain A [OS=Homo sapiens]	77.09	30	331	7	High	High	High	High	High	High	High	High	High	High	High	High	High	High	High	High	High	High	High	High	High	High	High	High	High	High
P09497-2	Isoform Non-brain of Clathrin light chain B [OS=Homo sapiens]	38.791	33	141	8	High	High	High	High	High	High	High	High	High	High	High	High	High	High	High	High	High	High	High	High	High	High	High	High	High	High
P09525	annexin A4 [OS=Homo sapiens]	167.081	66	468	19	High	High	High	High	High	High	High	High	High	High	High	High	High	High	High	High	High	High	High	High	High	High	High	High	High	High
P09543-1	2',3'-cyclic-nucleotide 3'-phosphodiesterase [OS=Homo sapiens]	124.015	47	118	15	Peak Found	High	High	Not Found	High	High	High	High	High	High	High	High	High	High	High	High	High	High	High	High	High	High	High	High	High	High
P09619	Platelet-derived growth factor receptor beta [OS=Homo sapiens]	47.515	14	81	8	High	Peak Found	High	Not Found	Not Found	Not Found	High	High	High	High	High	High	High	High	High	High	High	Peak Found	High	High	High	High	High	Not Found	Not Found	Not Found
P09622	Dihydrolipoyl dehydrogenase, mitochondrial [OS=Homo sapiens]	176.669	53	414	19	High	High	High	High	High	High	High	High	High	High	High	High	High	High	High	High	High	High	High	High	High	High	High	High	High	High
P09651-1	Heterogeneous nuclear ribonucleoprotein A1 [OS=Homo sapiens]	620.03	66	2061	1	Not Found	Not Found	Not Found	Not Found	Not Found	Not Found	High	Not Found	High	High	High	Not Found	Not Found	Not Found	High	Not Found	High	High	High	High	High	High	High	Not Found	Not Found	Not Found	Carbamyl [K15; K106; K113; K350]; Met-loss+Acetyl [N-Term]
P09651-2	Isoform A1-A of Heterogeneous nuclear ribonucleoprotein A1 [OS=Homo sapiens]	643.709	80	2071	1	Not Found	Not Found	Not Found	Not Found	Not Found	Not Found	Peak Found	High	High	High	High	Not Found	Not Found	Not Found	High	High	High	High	High	High	High	Peak Found	Not Found	Not Found	Not Found	Not Found	Carbamyl [K15; K106; K113; K298]; Met-loss+Acetyl [N-Term]
P09661	U2 small nuclear ribonucleoprotein A' [OS=Homo sapiens]	54.947	56	79	9	High	High	High	Peak Found	Not Found	Not Found	High	High	High	High	High	High	High	High	High	High	High	High	High	High	High	High	High	High	High	High	Met-loss [N-Term]
P09874	Poly [ADP-ribose] polymerase 1 [OS=Homo sapiens]	167.3	30	153	19	High	High	High	Peak Found	Peak Found	Peak Found	High	High	High	High	High	High	High	High	High	High	High	High	High	High	High	High	High	Peak Found	Peak Found	Peak Found
P09914	interferon-induced protein with tetratricopeptide repeats 1 [OS=Homo sapiens]	32.725	17	11	6	Not Found	Peak Found	Not Found	Not Found	Not Found	Not Found	High	High	Peak Found	Peak Found	Peak Found	Peak Found	Peak Found	Peak Found	Peak Found	Peak Found	Peak Found	Peak Found	Peak Found	Peak Found	High	Peak Found	Peak Found	Peak Found	Peak Found	Peak Found
P09936	Ubiquitin carboxyl-terminal hydrolase isozyme L1 [OS=Homo sapiens]	695.999	87	1376	18	High	High	High	High	High	High	High	High	High	High	High	High	High	High	High	High	High	High	High	High	High	High	High	High	High	High	Carbamyl [K4; K15; K135]; Acetyl [N-Term]; Acetyl [K4; K157]
P09960-1	leukotriene A-4 hydrolase [OS=Homo sapiens]	170.497	49	230	22	High	High	High	High	Peak Found	Peak Found	High	High	High	High	High	High	High	High	High	High	High	High	High	High	High	High	High	High	High	High	Met-loss [N-Term]
P09972	Fructose-bisphosphate aldolase C [OS=Homo sapiens]	241.064	40	810	6	High	High	High	Peak Found	High	High	High	High	High	High	High	High	High	High	High	High	High	High	High	High	High	High	High	High	High	High
P0C0L4-1	Complement C4-A [OS=Homo sapiens]	8.624	1	4	1	Not Found	Not Found	Not Found	Not Found	Not Found	Not Found	High	Peak Found	Peak Found	Peak Found	Peak Found	Not Found	High	Peak Found	Not Found	Not Found	Not Found	Peak Found	Peak Found	High	Peak Found	Peak Found	Peak Found	Not Found	Not Found	Peak Found
P0C7P4	Putative cytochrome b-c1 complex subunit Rieske-like protein 1 [OS=Homo sapiens]	59.134	22	123	1	Not Found	Not Found	Not Found	Not Found	Not Found	Not Found	Not Found	Not Found	High	Not Found	Not Found	Not Found	Not Found	Not Found	Not Found	Not Found	Not Found	Not Found	Not Found	Not Found	Not Found	Not Found	Not Found	Not Found	Not Found	Not Found
P0CG08	Golgi pH regulator B [OS=Homo sapiens]	12.92	9	12	2	Not Found	Not Found	Not Found	Not Found	Not Found	Not Found	Not Found	Not Found	Peak Found	High	High	Peak Found	High	Peak Found	Not Found	High	Peak Found	High	Not Found	High	Peak Found	Not Found	Peak Found	High	High	High
P0CG30	Glutathione S-transferase theta-2B [OS=Homo sapiens]	10.147	16	13	2	Not Found	Not Found	Not Found	Not Found	Not Found	Not Found	High	High	High	High	High	Not Found	Not Found	Not Found	High	High	High	Peak Found	Peak Found	Peak Found	Not Found	Not Found	Peak Found	High	High	Peak Found	Met-loss [N-Term]
P0CG35	thymosin beta-15B [OS=Homo sapiens]	9.404	33	7	1	Not Found	Not Found	Not Found	Not Found	Not Found	Not Found	Peak Found	Peak Found	High	High	High	Not Found	Peak Found	Not Found	Not Found	Peak Found	Peak Found	High	High	High	Not Found	Peak Found	Not Found	Not Found	Not Found	Not Found	Met-loss+Acetyl [N-Term]; Carbamyl [K4]; Met-loss [N-Term]
P0DMV8	heat shock 70 kDa protein 1A [OS=Homo sapiens]	596.323	70	1581	27	High	High	High	High	High	High	High	High	High	High	High	High	High	High	High	High	High	High	High	High	High	High	High	High	High	High
P10109	Adrenodoxin, mitochondrial [OS=Homo sapiens]	6.464	11	4	1	Not Found	Not Found	Not Found	Not Found	Not Found	Not Found	High	Not Found	Peak Found	Peak Found	Peak Found	Not Found	Peak Found	Peak Found	High	Peak Found	Peak Found	High	High	Peak Found	Not Found	Peak Found	Not Found	Peak Found	Peak Found	Peak Found
P10155-1	60 kDa SS-A/Ro ribonucleoprotein [OS=Homo sapiens]	94.442	33	209	12	High	High	High	High	High	High	High	High	High	High	High	High	High	High	High	High	High	High	High	High	High	High	High	High	High	High	Acetyl [N-Term]
P10253	lysosomal alpha-glucosidase [OS=Homo sapiens]	73.322	21	78	10	Peak Found	High	Peak Found	Not Found	Not Found	Not Found	Peak Found	Peak Found	Peak Found	Peak Found	Peak Found	Peak Found	Peak Found	Peak Found	High	High	High	High	High	High	High	High	High	High	High	High
P10301	Ras-related protein R-Ras [OS=Homo sapiens]	59.613	54	121	6	High	High	Peak Found	High	High	High	High	High	High	High	High	High	High	High	High	High	High	High	High	High	High	High	High	High	High	High
P10314	HLA class I histocompatibility antigen, A-32 alpha chain [OS=Homo sapiens]	161.586	45	272	0	Not Found	Not Found	Not Found	Not Found	Not Found	Not Found	Not Found	Not Found	Not Found	Not Found	Not Found	Not Found	Not Found	Not Found	Not Found	Not Found	Not Found	Not Found	Not Found	Not Found	Not Found	Not Found	Not Found	Not Found	Not Found	Not Found
P10321	HLA class I histocompatibility antigen, Cw-7 alpha chain [OS=Homo sapiens]	117.203	48	222	3	High	High	High	Not Found	Not Found	Not Found	High	High	High	High	High	High	High	High	High	High	High	High	High	High	High	High	High	Peak Found	Not Found	Not Found
P10412	Histone H1.4 [OS=Homo sapiens]	133.504	32	729	3	High	High	High	Peak Found	Peak Found	Peak Found	High	High	High	High	High	High	High	High	High	High	High	High	High	High	High	High	High	Peak Found	Peak Found	Peak Found	Carbamyl [K34]; Met-loss [N-Term]; Met-loss+Acetyl [N-Term]
P10515	Dihydrolipoyllysine-residue acetyltransferase component of pyruvate dehydrogenase complex, mitochondrial [OS=Homo sapiens]	104.178	38	187	16	High	High	High	High	High	Peak Found	High	High	High	High	High	High	High	High	High	High	High	High	High	High	High	High	High	High	High	High
P10586-1	Receptor-type tyrosine-protein phosphatase F [OS=Homo sapiens]	6.878	1	1	1	Not Found	Not Found	Not Found	Not Found	Not Found	Not Found	Not Found	Not Found	Not Found	Not Found	Not Found	Not Found	Not Found	Not Found	Not Found	Not Found	Not Found	Not Found	High	Not Found	Not Found	Not Found	Not Found	Not Found	Not Found	Not Found
P10599-1	thioredoxin [OS=Homo sapiens]	174.207	86	627	10	High	High	High	High	High	High	High	High	High	High	High	High	High	High	High	High	High	High	High	High	High	High	High	High	High	High	Carbamyl [K39]; Acetyl [K8]
P10606	Cytochrome c oxidase subunit 5B, mitochondrial [OS=Homo sapiens]	18.172	31	61	5	High	High	High	Peak Found	Peak Found	High	High	High	High	High	High	High	High	High	High	High	High	High	High	High	High	High	High	High	High	High
P10619	lysosomal protective protein [OS=Homo sapiens]	118.289	29	178	10	High	High	High	Peak Found	Peak Found	Peak Found	High	High	High	High	High	High	High	High	High	High	High	High	High	High	High	High	High	High	High	High
P10620	Microsomal glutathione S-transferase 1 [OS=Homo sapiens]	56.638	47	104	7	High	High	High	Not Found	Not Found	Not Found	High	High	High	High	High	High	High	High	High	High	High	Peak Found	High	High	Peak Found	High	Peak Found	High	High	High	Met-loss [N-Term]
P10644	cAMP-dependent protein kinase type I-alpha regulatory subunit [OS=Homo sapiens]	109.445	48	300	14	High	High	High	High	High	High	High	High	High	High	High	High	High	High	High	High	High	High	High	High	High	High	High	High	High	High	Acetyl [N-Term]
P10746	uroporphyrinogen-III synthase [OS=Homo sapiens]	8.661	6	8	1	Peak Found	High	High	Not Found	Not Found	Not Found	Peak Found	Not Found	Peak Found	Not Found	Peak Found	Peak Found	High	Peak Found	High	Peak Found	Peak Found	Peak Found	High	High	Not Found	Peak Found	Not Found	Not Found	Peak Found	Peak Found
P10768	S-formylglutathione hydrolase [OS=Homo sapiens]	304.184	86	589	17	High	High	High	High	High	High	High	High	High	High	High	High	High	High	High	High	High	High	High	High	High	High	High	High	High	High
P10809	60 kDa heat shock protein, mitochondrial [OS=Homo sapiens]	1060.32	80	3006	48	High	High	High	High	High	High	High	High	High	High	High	High	High	High	High	High	High	High	High	High	High	High	High	High	High	High	Acetyl [K160; K250]; Carbamyl [K160; K250; K269]
P11021	78 kDa glucose-regulated protein [OS=Homo sapiens]	1109.15	74	4441	51	High	High	High	High	High	High	High	High	High	High	High	High	High	High	High	High	High	High	High	High	High	High	High	High	High	High	Acetyl [K125; K601]; Carbamyl [K125; K164; K213; K353; K382; K601]
P11047	Laminin subunit gamma-1 [OS=Homo sapiens]	313.741	30	437	35	High	High	High	High	High	High	High	High	High	High	High	High	High	High	High	High	High	High	High	High	High	High	High	High	High	High
P11117	Lysosomal acid phosphatase [OS=Homo sapiens]	34.493	24	65	9	High	High	Peak Found	Peak Found	Peak Found	Peak Found	High	High	High	Peak Found	High	High	High	High	High	High	High	High	Peak Found	High	High	High	High	High	High	High
P11142-1	Heat shock cognate 71 kDa protein [OS=Homo sapiens]	1158.03	87	5030	39	High	High	High	High	High	High	High	High	High	High	High	High	High	High	High	High	High	High	High	High	High	High	High	High	High	High	Acetyl [K328]; Carbamyl [K3; K108; K188; K328]; Met-loss+Acetyl [N-Term]; Met-loss [N-Term]
P11169	Solute carrier family 2, facilitated glucose transporter member 3 [OS=Homo sapiens]	9.601	4	4	1	Not Found	Not Found	Not Found	Not Found	Not Found	Not Found	Not Found	Not Found	Not Found	Not Found	Not Found	Not Found	High	High	Not Found	Not Found	Not Found	Not Found	Not Found	Not Found	Not Found	Not Found	Not Found	Not Found	Not Found	Not Found
P11172	uridine 5'-monophosphate synthase [OS=Homo sapiens]	36.746	21	40	5	High	High	High	Not Found	Not Found	Not Found	High	Peak Found	High	High	High	High	High	High	High	High	High	High	High	High	High	High	High	Peak Found	Not Found	Peak Found
P11177	Pyruvate dehydrogenase E1 component subunit beta, mitochondrial [OS=Homo sapiens]	132.618	57	262	13	High	High	High	Peak Found	High	High	High	High	High	High	High	High	High	High	High	High	High	High	High	High	High	High	High	High	High	High
P11182	Lipoamide acyltransferase component of branched-chain alpha-keto acid dehydrogenase complex, mitochondrial [OS=Homo sapiens]	7.693	5	4	2	Not Found	Not Found	Not Found	Not Found	Not Found	Not Found	Not Found	Peak Found	Peak Found	Peak Found	Not Found	High	High	High	Peak Found	Peak Found	Peak Found	Peak Found	Peak Found	Peak Found	Peak Found	Peak Found	Peak Found	High	Not Found	Not Found
P11216	Glycogen phosphorylase, brain form [OS=Homo sapiens]	367.555	63	746	38	High	High	High	High	High	High	High	High	High	High	High	High	High	High	High	High	High	High	High	High	High	High	High	High	High	High	Met-loss+Acetyl [N-Term]
P11217	Glycogen phosphorylase, muscle form [OS=Homo sapiens]	75.975	15	171	1	Not Found	Not Found	Not Found	Not Found	Not Found	Not Found	Not Found	Not Found	Not Found	Not Found	Not Found	Not Found	High	Not Found	Not Found	Not Found	Not Found	Not Found	Not Found	Not Found	Not Found	Not Found	Not Found	Not Found	Not Found	Not Found
P11233	Ras-related protein Ral-A [OS=Homo sapiens]	131.091	62	230	5	High	Peak Found	High	Peak Found	Peak Found	Peak Found	High	High	High	High	High	High	High	High	High	High	High	High	High	High	High	High	High	High	High	High
P11234	Ras-related protein Ral-B [OS=Homo sapiens]	112.226	54	185	2	Not Found	Not Found	Not Found	Not Found	Not Found	Not Found	High	Peak Found	High	Peak Found	Peak Found	High	High	High	High	High	Peak Found	Peak Found	Peak Found	Peak Found	Peak Found	Peak Found	Peak Found	Not Found	Peak Found	Peak Found
P11279	Lysosome-associated membrane glycoprotein 1 [OS=Homo sapiens]	65.144	14	330	6	High	High	High	High	High	High	High	High	High	High	High	High	High	High	High	High	High	High	High	High	High	High	High	High	High	High
P11310-1	medium-chain specific acyl-CoA dehydrogenase, mitochondrial [OS=Homo sapiens]	67.077	38	114	10	High	High	Peak Found	Peak Found	Peak Found	High	High	High	High	High	High	High	High	High	High	High	High	High	High	High	High	High	High	High	High	High
P11362	Fibroblast growth factor receptor 1 [OS=Homo sapiens]	7.597	3	10	1	Not Found	Not Found	Not Found	Not Found	Not Found	Not Found	High	High	Peak Found	Peak Found	Peak Found	Not Found	Not Found	Not Found	Not Found	Not Found	Not Found	Peak Found	Not Found	Peak Found	Not Found	Not Found	Not Found	Not Found	Not Found	Not Found
P11387	DNA topoisomerase 1 [OS=Homo sapiens]	55.889	19	95	10	High	High	High	Peak Found	High	High	High	High	High	High	High	Peak Found	Peak Found	Peak Found	High	High	High	High	High	High	High	High	High	High	High	High	Met-loss+Acetyl [N-Term]
P11388-1	DNA topoisomerase 2-alpha [OS=Homo sapiens]	22.47	6	11	3	Not Found	Peak Found	High	Not Found	Not Found	Not Found	Peak Found	Peak Found	High	Peak Found	Peak Found	Peak Found	Not Found	Not Found	Peak Found	Peak Found	Peak Found	Not Found	Not Found	Peak Found	Peak Found	High	Peak Found	Peak Found	Not Found	Not Found
P11413-1	Glucose-6-phosphate 1-dehydrogenase [OS=Homo sapiens]	590.895	78	1181	35	High	High	High	High	High	High	High	High	High	High	High	High	High	High	High	High	High	High	High	High	High	High	High	High	High	High	Carbamyl [K408]; Met-loss+Acetyl [N-Term]
P11441	Ubiquitin-like protein 4A [OS=Homo sapiens]	4.429	6	7	1	High	Peak Found	Peak Found	Not Found	Not Found	Not Found	Peak Found	Peak Found	High	Peak Found	Peak Found	Peak Found	High	Peak Found	High	Peak Found	Peak Found	High	High	Peak Found	Peak Found	High	Peak Found	Not Found	Not Found	Not Found
P11498	pyruvate carboxylase, mitochondrial [OS=Homo sapiens]	57.698	18	53	11	High	Peak Found	Peak Found	Peak Found	Peak Found	Peak Found	High	High	High	High	High	High	High	High	High	High	Peak Found	High	High	High	Peak Found	Peak Found	Peak Found	High	High	High
P11586	C-1-tetrahydrofolate synthase, cytoplasmic [OS=Homo sapiens]	283.989	63	751	42	High	High	High	High	High	High	High	High	High	High	High	High	High	High	High	High	High	High	High	High	High	High	High	High	High	High	Met-loss [N-Term]
P11717	Cation-independent mannose-6-phosphate receptor [OS=Homo sapiens]	314.395	25	416	40	High	High	High	High	High	High	High	High	High	High	High	High	High	High	High	High	High	High	High	High	High	High	High	High	High	High
P11766	alcohol dehydrogenase class-3 [OS=Homo sapiens]	247.808	68	576	20	High	High	High	High	High	High	High	High	High	High	High	High	High	High	High	High	High	High	High	High	High	High	High	High	High	High
P11802	Cyclin-dependent kinase 4 [OS=Homo sapiens]	28.113	31	43	5	Peak Found	Not Found	Peak Found	Not Found	Not Found	Not Found	High	High	High	High	High	High	High	High	High	High	High	High	High	High	High	High	High	Peak Found	Peak Found	High
P11908	ribose-phosphate pyrophosphokinase 2 [OS=Homo sapiens]	84.108	42	172	3	Peak Found	Peak Found	Peak Found	Not Found	Not Found	Not Found	High	High	High	High	High	High	High	Peak Found	High	High	High	High	High	High	High	High	High	Peak Found	Peak Found	Peak Found	Met-loss [N-Term]
P11940-1	Polyadenylate-binding protein 1 [OS=Homo sapiens]	391.071	58	1190	10	High	High	High	High	High	High	High	High	High	High	High	High	High	High	High	High	High	High	High	High	High	High	High	High	High	High	Carbamyl [K113; K129; K312]; Acetyl [N-Term]
P12004	proliferating cell nuclear antigen [OS=Homo sapiens]	196.677	68	528	13	High	High	High	High	High	High	High	High	High	High	High	High	High	High	High	High	High	High	High	High	High	High	High	High	High	High
P12081	Histidine--tRNA ligase, cytoplasmic [OS=Homo sapiens]	184.533	57	467	18	High	High	High	High	High	High	High	High	High	High	High	High	High	High	High	High	High	High	High	High	High	High	High	High	High	High
P12107	Collagen alpha-1(XI) chain [OS=Homo sapiens]	4.927	1	2	1	Not Found	Not Found	Not Found	Not Found	Not Found	Not Found	High	High	Not Found	Not Found	Not Found	Not Found	Not Found	Not Found	Not Found	Not Found	Not Found	Not Found	Not Found	Not Found	Not Found	Not Found	Not Found	Not Found	Not Found	Not Found
P12109	Collagen alpha-1(VI) chain [OS=Homo sapiens]	530.106	56	920	36	High	High	High	High	High	High	High	High	High	High	High	High	High	High	High	High	High	High	High	High	High	High	High	High	High	High	Acetyl [K937]
P12110	Collagen alpha-2(VI) chain [OS=Homo sapiens]	200.832	30	423	3	Not Found	Not Found	High	Peak Found	Not Found	Not Found	High	High	High	High	High	High	High	High	High	High	High	High	High	High	High	High	High	High	High	High
P12110-2	Isoform 2C2A of Collagen alpha-2(VI) chain [OS=Homo sapiens]	181.852	31	400	1	Not Found	Not Found	Not Found	Not Found	Not Found	Not Found	High	High	High	High	High	High	High	High	Peak Found	High	Peak Found	High	High	High	Not Found	High	Not Found	High	High	High
P12235	ADP/ATP translocase 1 [OS=Homo sapiens]	166.077	50	562	2	Not Found	Not Found	Not Found	Not Found	Not Found	Not Found	Peak Found	Not Found	Peak Found	Peak Found	Peak Found	High	High	Peak Found	Peak Found	Peak Found	Peak Found	Peak Found	Peak Found	Not Found	High	High	High	High	High	High
P12236	ADP/ATP translocase 3 [OS=Homo sapiens]	200.054	61	745	4	High	High	High	High	High	High	High	High	High	High	High	High	High	High	High	High	High	High	High	High	High	High	High	High	High	High	Met-loss+Acetyl [N-Term]; Acetyl [N-Term]
P12259	Coagulation factor V [OS=Homo sapiens]	30.635	2	18	3	Peak Found	Peak Found	High	Not Found	Not Found	Not Found	Not Found	Not Found	Not Found	Peak Found	Peak Found	Not Found	Peak Found	Peak Found	Not Found	Not Found	Not Found	Not Found	Not Found	Not Found	High	Peak Found	Peak Found	High	High	High
P12268	inosine-5'-monophosphate dehydrogenase 2 [OS=Homo sapiens]	276.794	66	546	23	High	High	High	High	High	High	High	High	High	High	High	High	High	High	High	High	High	High	High	High	High	High	High	High	High	High	Carbamyl [K208]
P12270	Nucleoprotein TPR [OS=Homo sapiens]	321.24	28	488	42	High	High	High	High	High	High	High	High	High	High	High	High	High	High	High	High	High	High	High	High	High	High	High	High	High	High	Met-loss+Acetyl [N-Term]
P12277	Creatine kinase B-type [OS=Homo sapiens]	155.56	57	260	13	High	High	High	High	High	Peak Found	High	High	High	High	High	High	High	High	High	High	High	High	High	High	High	High	High	High	High	High	Met-loss [N-Term]
P12429	annexin A3 [OS=Homo sapiens]	6.366	5	4	1	Not Found	Not Found	Not Found	Not Found	Not Found	Not Found	Not Found	High	Not Found	Not Found	Not Found	Not Found	Not Found	Not Found	High	High	Not Found	Not Found	Not Found	High	Not Found	Not Found	Not Found	Not Found	Not Found	Not Found
P12694	2-oxoisovalerate dehydrogenase subunit alpha, mitochondrial [OS=Homo sapiens]	14.726	7	5	1	Not Found	Not Found	High	Not Found	Not Found	Not Found	Not Found	Peak Found	Peak Found	Not Found	Peak Found	Not Found	Not Found	Not Found	Peak Found	Peak Found	Peak Found	Peak Found	Not Found	Peak Found	High	High	High	Not Found	Not Found	Not Found
P12814-3	Isoform 3 of Alpha-actinin-1 [OS=Homo sapiens]	1690.83	83	4971	53	High	High	High	High	High	High	High	High	High	High	High	High	High	High	High	High	High	High	High	High	High	High	High	High	High	High	Acetyl [K198; K436]; Carbamyl [K35; K198; K436]; Acetyl [N-Term]
P12955	xaa-Pro dipeptidase [OS=Homo sapiens]	116.46	50	257	16	High	High	High	High	High	High	High	High	High	High	High	High	High	High	High	High	High	High	High	High	High	High	High	High	High	High	Met-loss+Acetyl [N-Term]
P12956	X-ray repair cross-complementing protein 6 [OS=Homo sapiens]	349.669	58	675	37	High	High	High	High	High	High	High	High	High	High	High	High	High	High	High	High	High	High	High	High	High	High	High	High	High	High	Met-loss+Acetyl [N-Term]; Carbamyl [K9]; Met-loss [N-Term]
P13010	X-ray repair cross-complementing protein 5 [OS=Homo sapiens]	486.213	71	985	40	High	High	High	High	High	High	High	High	High	High	High	High	High	High	High	High	High	High	High	High	High	High	High	High	High	High	Acetyl [K443]; Carbamyl [K443]
P13073	Cytochrome c oxidase subunit 4 isoform 1, mitochondrial [OS=Homo sapiens]	30.421	34	186	6	High	High	High	High	Peak Found	Peak Found	High	High	High	High	High	High	High	High	High	High	High	High	High	High	High	High	High	High	High	High
P13284	Gamma-interferon-inducible lysosomal thiol reductase [OS=Homo sapiens]	9.924	15	4	2	Not Found	Not Found	Not Found	Not Found	Not Found	Not Found	High	Peak Found	Peak Found	Peak Found	Peak Found	High	Peak Found	High	Peak Found	Not Found	Peak Found	Not Found	Not Found	Not Found	Not Found	Not Found	Not Found	Not Found	Not Found	Not Found
P13473-1	Lysosome-associated membrane glycoprotein 2 [OS=Homo sapiens]	52.775	14	182	5	High	High	High	Peak Found	High	High	High	High	High	High	High	High	High	High	High	High	High	High	High	High	High	High	High	High	High	High
P13489	Ribonuclease inhibitor [OS=Homo sapiens]	538.514	85	1223	28	High	High	High	High	High	High	High	High	High	High	High	High	High	High	High	High	High	High	High	High	High	High	High	High	High	High	Met-loss+Acetyl [N-Term]
P13612	Integrin alpha-4 [OS=Homo sapiens]	27.912	6	17	4	High	High	High	Not Found	Not Found	Not Found	High	High	High	High	High	Peak Found	High	High	Peak Found	Peak Found	Peak Found	Peak Found	Not Found	High	Peak Found	High	Peak Found	Not Found	Not Found	Not Found
P13639	Elongation factor 2 [OS=Homo sapiens]	1271.77	77	4965	64	High	High	High	High	High	High	High	High	High	High	High	High	High	High	High	High	High	High	High	High	High	High	High	High	High	High	Carbamyl [K648; K845]; Met-loss [N-Term]
P13645	Keratin, type I cytoskeletal 10 [OS=Homo sapiens]	413.017	60	748	24	High	High	High	High	High	High	High	High	High	High	High	High	High	High	High	High	High	High	High	High	High	High	High	High	High	High
P13647	keratin, type II cytoskeletal 5 [OS=Homo sapiens]	32.838	18	94	4	Peak Found	Not Found	Peak Found	Not Found	Not Found	Not Found	Peak Found	Peak Found	Peak Found	Peak Found	Not Found	High	Peak Found	Peak Found	Peak Found	Peak Found	Peak Found	High	High	High	Not Found	Not Found	Not Found	High	High	High
P13667	Protein disulfide-isomerase A4 [OS=Homo sapiens]	477.631	63	1348	49	High	High	High	High	High	High	High	High	High	High	High	High	High	High	High	High	High	High	High	High	High	High	High	High	High	High	Carbamyl [K145]
P13674-1	prolyl 4-hydroxylase subunit alpha-1 [OS=Homo sapiens]	392.421	66	807	1	Not Found	Not Found	Not Found	Not Found	Not Found	Not Found	High	High	High	Peak Found	Peak Found	High	High	High	High	High	High	High	High	High	High	High	High	High	High	High
P13674-2	Isoform 2 of Prolyl 4-hydroxylase subunit alpha-1 [OS=Homo sapiens]	392.047	66	796	2	High	Peak Found	Peak Found	High	Peak Found	Peak Found	Peak Found	High	Peak Found	Peak Found	Peak Found	High	High	High	Peak Found	Peak Found	Peak Found	High	High	Peak Found	High	High	High	High	High	High
P13693	Translationally-controlled tumor protein [OS=Homo sapiens]	269.923	85	698	10	High	High	High	High	High	High	High	High	High	High	High	High	High	High	High	High	High	High	High	High	High	High	High	High	High	High	Carbamyl [K112]
P13716-1	Delta-aminolevulinic acid dehydratase [OS=Homo sapiens]	21.019	24	51	6	High	High	High	Peak Found	Peak Found	Peak Found	High	High	High	High	High	High	High	High	High	High	High	High	High	High	High	High	High	Peak Found	Peak Found	High	Acetyl [N-Term]
P13746	HLA class I histocompatibility antigen, A-11 alpha chain [OS=Homo sapiens]	209.39	61	308	1	Not Found	Not Found	Not Found	Not Found	Not Found	Not Found	High	High	Peak Found	Not Found	Not Found	Not Found	Not Found	Not Found	Not Found	Not Found	Peak Found	Not Found	High	Peak Found	Not Found	Not Found	Not Found	Not Found	Not Found	Not Found
P13797	Plastin-3 [OS=Homo sapiens]	537.532	77	1501	46	High	High	High	High	High	High	High	High	High	High	High	High	High	High	High	High	High	High	High	High	High	High	High	High	High	High	Carbamyl [K168; K459]; Acetyl [N-Term]
P13798	Acylamino-acid-releasing enzyme [OS=Homo sapiens]	151.369	38	252	16	High	High	High	High	High	High	High	High	High	High	High	High	High	High	High	High	High	High	High	High	High	High	High	High	High	High
P13804-1	Electron transfer flavoprotein subunit alpha, mitochondrial [OS=Homo sapiens]	198.946	61	500	13	High	High	High	High	High	High	High	High	High	High	High	High	High	High	High	High	High	High	High	High	High	High	High	High	High	High
P13807	glycogen [starch] synthase, muscle [OS=Homo sapiens]	18.808	12	23	5	High	High	Peak Found	Not Found	Not Found	Not Found	High	High	High	High	High	Peak Found	High	High	Peak Found	High	High	Peak Found	Peak Found	Peak Found	High	High	High	Peak Found	High	Peak Found
P13861	cAMP-dependent protein kinase type II-alpha regulatory subunit [OS=Homo sapiens]	154.389	61	387	15	High	High	High	High	High	High	High	High	High	High	High	High	High	High	High	High	High	High	High	High	High	High	High	High	High	High	Met-loss+Acetyl [N-Term]
P13929-1	Beta-enolase [OS=Homo sapiens]	210.885	21	1053	2	High	High	High	High	Not Found	High	High	High	High	High	High	High	High	High	High	High	High	High	High	High	High	High	High	High	High	High	Acetyl [K394]
P13984	General transcription factor IIF subunit 2 [OS=Homo sapiens]	61.175	57	73	8	High	High	High	High	High	Peak Found	High	High	High	High	High	Peak Found	Peak Found	High	High	High	High	High	High	High	High	High	High	Peak Found	Peak Found	Not Found	Met-loss+Acetyl [N-Term]
P13987	CD59 glycoprotein [OS=Homo sapiens]	78.152	28	426	7	High	High	High	High	High	High	High	High	High	High	High	High	High	High	High	High	High	High	High	High	High	High	High	High	High	High
P13995	Bifunctional methylenetetrahydrofolate dehydrogenase/cyclohydrolase, mitochondrial [OS=Homo sapiens]	19.118	15	14	3	High	Peak Found	Peak Found	Peak Found	Peak Found	Peak Found	High	Peak Found	High	High	High	Peak Found	Peak Found	Peak Found	High	Peak Found	Peak Found	High	High	Peak Found	Peak Found	Peak Found	Peak Found	Peak Found	Peak Found	Peak Found
P14136	Glial fibrillary acidic protein [OS=Homo sapiens]	12.628	6	170	0	Not Found	Not Found	Not Found	Not Found	Not Found	Not Found	Not Found	Not Found	Not Found	Not Found	Not Found	Not Found	Not Found	Not Found	Not Found	Not Found	Not Found	Not Found	Not Found	Not Found	Not Found	Not Found	Not Found	Not Found	Not Found	Not Found
P14174	Macrophage Migration inhibitory factor [OS=Homo sapiens]	22.481	37	168	3	High	High	High	High	High	Peak Found	High	High	High	High	High	High	High	High	High	High	High	High	High	High	High	High	High	High	High	High	Met-loss [N-Term]
P14209	CD99 antigen [OS=Homo sapiens]	85.898	34	154	5	High	High	High	High	High	Peak Found	High	High	High	High	High	High	High	High	High	High	High	High	High	High	High	High	High	High	High	High
P14314	Glucosidase 2 subunit beta [OS=Homo sapiens]	303.001	49	875	24	High	High	High	High	High	High	High	High	High	High	High	High	High	High	High	High	High	High	High	High	High	High	High	High	High	High
P14324-2	Isoform 2 of Farnesyl pyrophosphate synthase [OS=Homo sapiens]	102.709	46	151	12	High	High	Peak Found	Peak Found	Peak Found	Peak Found	High	High	High	High	High	High	High	High	High	High	High	High	High	High	High	High	High	High	High	High	Acetyl [N-Term]
P14406	Cytochrome c oxidase subunit 7A2, mitochondrial [OS=Homo sapiens]	16.979	59	53	4	High	High	High	Not Found	Not Found	Not Found	High	High	High	High	High	High	Peak Found	High	High	High	High	High	High	High	High	High	Peak Found	High	High	High
P14550	alcohol dehydrogenase [NADP(+)] [OS=Homo sapiens]	103.314	68	272	13	High	High	High	High	High	High	High	High	High	High	High	High	High	High	High	High	High	High	High	High	High	High	High	High	High	High	Met-loss+Acetyl [N-Term]
P14618	Pyruvate kinase PKM [OS=Homo sapiens]	1635.39	87	7673	5	High	High	High	High	High	High	High	High	High	High	High	High	High	High	High	High	High	High	High	High	High	High	High	High	High	High	Carbamyl [K3; K66; K115; K135; K173; K188; K207; K247; K270; K322; K336; K367; K475; K498; K505]; Acetyl [K3; K207; K322; K336; K475]; Met-loss+Acetyl [N-Term]; Met-loss [N-Term]
P14618-2	Isoform M1 of Pyruvate kinase PKM [OS=Homo sapiens]	1514.99	87	7235	5	High	High	High	Peak Found	Peak Found	High	High	High	High	High	High	High	High	High	High	High	High	High	High	High	High	High	High	High	High	High	Carbamyl [K3; K66; K115; K135; K173; K188; K207; K247; K270; K322; K336; K367; K475; K498; K505]; Acetyl [K3; K207; K322; K336; K475]; Met-loss+Acetyl [N-Term]; Met-loss [N-Term]
P14625	Endoplasmin [OS=Homo sapiens]	1230.96	76	4649	64	High	High	High	High	High	High	High	High	High	High	High	High	High	High	High	High	High	High	High	High	High	High	High	High	High	High	Carbamyl [K270; K434; K561; K597; K702; K708]; Acetyl [K270]
P14678-1	Small nuclear ribonucleoprotein-associated proteins B and B' [OS=Homo sapiens]	30.955	21	126	5	High	High	High	High	High	Peak Found	High	High	High	High	High	High	High	High	High	High	High	High	High	High	High	High	High	High	High	High
P14735	insulin-degrading enzyme [OS=Homo sapiens]	63.882	17	43	12	High	High	High	Peak Found	Peak Found	Peak Found	High	High	High	High	High	Peak Found	High	High	Peak Found	Peak Found	Peak Found	Peak Found	High	Peak Found	High	High	High	Peak Found	Peak Found	High
P14866	Heterogeneous nuclear ribonucleoprotein L [OS=Homo sapiens]	571.945	72	917	29	High	High	High	High	High	High	High	High	High	High	High	High	High	High	High	High	High	High	High	High	High	High	High	High	High	High
P14868	Aspartate--tRNA ligase, cytoplasmic [OS=Homo sapiens]	169.173	55	478	23	High	High	High	High	High	High	High	High	High	High	High	High	High	High	High	High	High	High	High	High	High	High	High	High	High	High
P14923	Junction plakoglobin [OS=Homo sapiens]	110.074	35	98	13	Peak Found	Peak Found	Not Found	Not Found	Not Found	Not Found	High	High	High	High	High	Peak Found	Peak Found	Not Found	Peak Found	Peak Found	Peak Found	High	High	High	Peak Found	Peak Found	Peak Found	Peak Found	Peak Found	Not Found
P14927	Cytochrome b-c1 complex subunit 7 [OS=Homo sapiens]	19.717	34	32	3	Peak Found	Peak Found	Peak Found	Not Found	Not Found	Not Found	High	High	High	High	High	High	High	Peak Found	Peak Found	High	High	High	High	High	High	High	Peak Found	High	High	High
P15090	Fatty acid-binding protein, adipocyte [OS=Homo sapiens]	41.271	55	45	6	Peak Found	Peak Found	Peak Found	Peak Found	Peak Found	Peak Found	Peak Found	Peak Found	High	High	Peak Found	High	High	High	Peak Found	Peak Found	Peak Found	High	High	High	High	High	High	Peak Found	Peak Found	Peak Found	Met-loss+Acetyl [N-Term]
P15104	Glutamine synthetase [OS=Homo sapiens]	20.965	17	20	4	High	High	Peak Found	High	High	High	High	High	High	Peak Found	Peak Found	Peak Found	Peak Found	Peak Found	Peak Found	Peak Found	Peak Found	High	High	High	Peak Found	Peak Found	High	Not Found	Not Found	Peak Found	Met-loss+Acetyl [N-Term]
P15121	aldose reductase [OS=Homo sapiens]	295.814	79	666	16	High	High	High	High	High	High	High	High	High	High	High	High	High	High	High	High	High	High	High	High	High	High	High	High	High	High	Acetyl [K179]; Carbamyl [K179]
P15151-1	Poliovirus receptor [OS=Homo sapiens]	45.669	13	81	4	High	High	High	Peak Found	High	High	High	High	High	High	High	High	High	High	High	Peak Found	Peak Found	High	Peak Found	High	High	High	High	High	High	High
P15170-3	Isoform 3 of Eukaryotic peptide chain release factor GTP-binding subunit ERF3A [OS=Homo sapiens]	200.185	50	424	13	High	High	High	High	High	High	High	High	High	High	High	High	High	High	High	High	High	High	High	High	High	High	High	High	High	High
P15289-1	arylsulfatase A [OS=Homo sapiens]	45.404	19	61	6	Not Found	Not Found	Not Found	Not Found	Not Found	Not Found	High	High	High	Peak Found	Peak Found	High	High	High	High	High	High	Peak Found	Peak Found	Not Found	Peak Found	Peak Found	High	High	High	High
P15291	Beta-1,4-galactosyltransferase 1 [OS=Homo sapiens]	13.922	8	10	2	Not Found	Not Found	Not Found	Not Found	Not Found	Not Found	Peak Found	Peak Found	Peak Found	Peak Found	Peak Found	Peak Found	High	High	High	Peak Found	Peak Found	Peak Found	Peak Found	Not Found	Peak Found	Peak Found	Peak Found	High	High	High
P15311	Ezrin [OS=Homo sapiens]	341.513	58	1241	22	High	High	High	High	High	High	High	High	High	High	High	High	High	High	High	High	High	High	High	High	High	High	High	High	High	High	Carbamyl [K263; K296]
P15313	V-type proton ATPase subunit B, kidney isoform [OS=Homo sapiens]	110.868	24	193	1	Not Found	Not Found	Not Found	Not Found	Not Found	Not Found	High	High	High	Peak Found	Peak Found	Peak Found	High	High	Peak Found	High	High	High	High	High	Peak Found	Peak Found	Peak Found	High	High	High
P15374	Ubiquitin carboxyl-terminal hydrolase isozyme L3 [OS=Homo sapiens]	115.059	66	177	11	High	High	High	Peak Found	High	Peak Found	High	High	High	High	High	High	High	High	High	High	High	High	High	High	High	High	High	High	High	High
P15407	Fos-related antigen 1 [OS=Homo sapiens]	5.176	5	5	1	Not Found	Not Found	Not Found	Not Found	Not Found	Not Found	Not Found	Not Found	High	Peak Found	Peak Found	Not Found	Not Found	Peak Found	Peak Found	High	Peak Found	Peak Found	High	High	Not Found	Peak Found	Not Found	Not Found	Not Found	Not Found
P15408-1	Fos-related antigen 2 [OS=Homo sapiens]	4.219	5	4	1	Peak Found	Peak Found	Peak Found	Peak Found	Not Found	Not Found	Peak Found	Peak Found	Peak Found	Peak Found	Peak Found	Not Found	Not Found	Peak Found	Peak Found	High	High	Not Found	Peak Found	Peak Found	Peak Found	High	High	Not Found	Not Found	Not Found
P15529-2	Isoform B of Membrane cofactor protein [OS=Homo sapiens]	4.95	3	1	1	Peak Found	Peak Found	High	Not Found	Not Found	Not Found	Not Found	Peak Found	Not Found	Not Found	Not Found	Peak Found	Not Found	Peak Found	Not Found	Not Found	Not Found	Not Found	Not Found	Not Found	Not Found	Peak Found	Not Found	Not Found	Not Found	Not Found
P15531	Nucleoside diphosphate kinase A [OS=Homo sapiens]	214.906	86	1176	3	High	High	High	High	High	High	High	High	High	High	High	High	High	High	High	High	High	High	High	High	High	High	High	High	High	High	Carbamyl [K12]
P15586	N-acetylglucosamine-6-sulfatase [OS=Homo sapiens]	109.118	34	257	15	High	High	High	Peak Found	High	Peak Found	High	High	High	High	High	High	High	High	High	High	High	High	High	High	High	High	High	High	High	High
P15848	arylsulfatase B [OS=Homo sapiens]	31.132	15	18	5	Not Found	Not Found	Not Found	Peak Found	Not Found	Peak Found	Peak Found	Peak Found	Peak Found	Peak Found	Not Found	High	Peak Found	Peak Found	High	High	High	High	High	High	Peak Found	Peak Found	Peak Found	High	High	High
P15880	40S ribosomal protein S2 [OS=Homo sapiens]	188.15	52	879	15	High	High	High	High	High	High	High	High	High	High	High	High	High	High	High	High	High	High	High	High	High	High	High	High	High	High
P15924-1	Desmoplakin [OS=Homo sapiens]	126.616	13	71	23	Peak Found	Peak Found	Peak Found	Peak Found	Peak Found	Peak Found	Peak Found	Peak Found	Peak Found	Peak Found	Peak Found	High	High	High	Peak Found	Peak Found	Peak Found	Peak Found	Peak Found	Peak Found	High	Peak Found	Peak Found	High	High	High
P15927-1	Replication protein A 32 kDa subunit [OS=Homo sapiens]	84.001	50	82	8	High	High	High	Peak Found	Peak Found	Peak Found	High	High	High	High	High	High	High	High	High	High	High	High	High	High	High	High	High	High	Peak Found	High
P16035	Metalloproteinase inhibitor 2 [OS=Homo sapiens]	10.691	16	19	2	Peak Found	High	Peak Found	Not Found	Not Found	Not Found	High	High	High	High	High	Peak Found	High	High	Peak Found	High	High	High	High	High	Peak Found	High	High	Peak Found	High	High
P16083	Ribosyldihydronicotinamide dehydrogenase [quinone] [OS=Homo sapiens]	13.165	13	6	3	Peak Found	Peak Found	Peak Found	Not Found	Not Found	Not Found	Peak Found	Peak Found	Peak Found	Peak Found	Peak Found	Peak Found	Peak Found	Peak Found	Peak Found	Peak Found	Peak Found	High	High	High	Peak Found	Peak Found	Peak Found	Peak Found	Not Found	Peak Found
P16152	Carbonyl reductase [NADPH] 1 [OS=Homo sapiens]	224.311	79	754	16	High	High	High	High	High	High	High	High	High	High	High	High	High	High	High	High	High	High	High	High	High	High	High	High	High	High	Met-loss+Acetyl [N-Term]
P16278	Beta-galactosidase [OS=Homo sapiens]	113.914	27	129	13	High	Peak Found	Peak Found	Peak Found	Not Found	Not Found	High	High	High	High	High	High	High	High	High	High	High	High	High	High	High	High	High	High	High	High
P16298	serine/threonine-protein phosphatase 2B catalytic subunit beta isoform [OS=Homo sapiens]	40.316	16	116	1	Peak Found	Not Found	Peak Found	Not Found	Not Found	Not Found	Not Found	Not Found	Peak Found	Peak Found	Peak Found	Not Found	Peak Found	Not Found	High	Peak Found	Peak Found	Not Found	Not Found	Peak Found	Peak Found	Peak Found	Peak Found	Not Found	Not Found	Not Found
P16333-1	Cytoplasmic protein NCK1 [OS=Homo sapiens]	42.028	27	41	7	High	High	High	Peak Found	Peak Found	Not Found	High	High	High	High	High	High	Peak Found	Peak Found	High	High	High	High	High	High	High	High	Peak Found	Not Found	Peak Found	Peak Found	Met-loss+Acetyl [N-Term]
P16402	Histone H1.3 [OS=Homo sapiens]	101.101	33	679	2	High	Peak Found	Peak Found	Peak Found	Peak Found	Peak Found	High	High	High	High	High	Peak Found	Not Found	Not Found	High	High	High	High	High	High	High	High	High	Not Found	Not Found	Not Found	Carbamyl [K35]; Met-loss+Acetyl [N-Term]
P16403	Histone H1.2 [OS=Homo sapiens]	135.463	41	808	6	High	High	High	High	High	High	High	High	High	High	High	High	High	High	High	High	High	High	High	High	High	High	High	Peak Found	Peak Found	Peak Found	Carbamyl [K34]; Met-loss [N-Term]; Met-loss+Acetyl [N-Term]
P16435	NADPH--cytochrome P450 reductase [OS=Homo sapiens]	85.797	21	110	9	Peak Found	Peak Found	High	Not Found	Not Found	Not Found	High	High	High	High	High	High	High	High	High	High	High	High	High	High	High	High	High	High	High	High
P16615	Sarcoplasmic/endoplasmic reticulum calcium ATPase 2 [OS=Homo sapiens]	319.106	35	719	32	High	High	High	High	High	High	High	High	High	High	High	High	High	High	High	High	High	High	High	High	High	High	High	High	High	High
P16930	Fumarylacetoacetase [OS=Homo sapiens]	103.171	57	198	14	High	High	High	Peak Found	Peak Found	Peak Found	High	High	High	High	High	High	High	High	High	High	High	High	High	High	High	High	High	High	High	High	Met-loss+Acetyl [N-Term]
P16949-1	Stathmin [OS=Homo sapiens]	114.115	72	634	17	High	High	High	High	High	High	High	High	High	High	High	High	High	High	High	High	High	High	High	High	High	High	High	High	High	High	Met-loss+Acetyl [N-Term]
P16989-1	Y-box-binding protein 3 [OS=Homo sapiens]	288.873	66	464	2	Not Found	Not Found	Not Found	Not Found	Not Found	Not Found	Not Found	Not Found	Not Found	High	High	Peak Found	Not Found	High	Not Found	High	Not Found	High	High	Peak Found	High	Not Found	High	Not Found	Not Found	Not Found	Met-loss+Acetyl [N-Term]
P16989-2	Isoform 2 of Y-box-binding protein 3 [OS=Homo sapiens]	267.736	73	464	1	Not Found	Not Found	Not Found	Not Found	Not Found	Not Found	Peak Found	Peak Found	High	High	Peak Found	Peak Found	High	Peak Found	Peak Found	High	Peak Found	Peak Found	High	Peak Found	High	High	Peak Found	Not Found	Not Found	Not Found	Met-loss+Acetyl [N-Term]
P17050	alpha-N-acetylgalactosaminidase [OS=Homo sapiens]	60.86	34	55	9	Peak Found	High	Peak Found	Not Found	Not Found	Not Found	Peak Found	Peak Found	High	High	High	High	High	High	High	High	High	High	High	High	High	Peak Found	Peak Found	High	High	High
P17096-1	High mobility group protein HMG-I/HMG-Y [OS=Homo sapiens]	110.675	62	366	3	High	High	High	Peak Found	Peak Found	High	High	High	High	High	High	High	High	High	High	High	High	High	High	High	High	High	High	High	High	High	Carbamyl [K31]; Acetyl [K31; K46]
P17096-2	Isoform HMG-Y of High mobility group protein HMG-I/HMG-Y [OS=Homo sapiens]	30.657	57	235	1	High	High	High	Peak Found	Peak Found	Peak Found	High	High	High	High	High	High	High	High	High	High	High	High	High	High	High	High	High	High	High	High	Carbamyl [K31]
P17174	Aspartate aminotransferase, cytoplasmic [OS=Homo sapiens]	208.067	63	433	18	High	High	High	High	Peak Found	High	High	High	High	High	High	High	High	High	High	High	High	High	High	High	High	High	High	High	High	High	Met-loss [N-Term]
P17252	Protein kinase C alpha type [OS=Homo sapiens]	65.963	24	102	10	Not Found	Peak Found	High	Not Found	Not Found	Not Found	High	High	High	High	High	High	High	High	High	High	High	High	High	High	High	High	High	High	High	High	Met-loss+Acetyl [N-Term]
P17301	Integrin alpha-2 [OS=Homo sapiens]	359.78	41	665	31	High	High	High	High	High	High	High	High	High	High	High	High	High	High	High	High	High	High	High	High	High	High	High	High	High	High
P17302	Gap junction alpha-1 protein [OS=Homo sapiens]	58.318	28	50	7	High	High	High	Not Found	Not Found	Peak Found	High	High	High	High	High	Peak Found	Peak Found	Peak Found	High	High	High	Peak Found	Peak Found	Peak Found	High	High	High	Peak Found	Peak Found	Peak Found
P17405-1	Sphingomyelin phosphodiesterase [OS=Homo sapiens]	4.622	4	1	1	Not Found	Not Found	Not Found	Not Found	Not Found	Not Found	Peak Found	Peak Found	Not Found	Not Found	Not Found	Not Found	Peak Found	Not Found	Peak Found	Not Found	Peak Found	Not Found	Not Found	Not Found	Not Found	Not Found	Not Found	High	Peak Found	Peak Found
P17480-1	Nucleolar transcription factor 1 [OS=Homo sapiens]	4.982	2	4	1	Not Found	Peak Found	Not Found	Not Found	Not Found	Not Found	High	Peak Found	High	High	High	Peak Found	Peak Found	Peak Found	Peak Found	Peak Found	Peak Found	Not Found	Not Found	Not Found	Peak Found	Peak Found	Not Found	Not Found	Peak Found	Not Found
P17612	cAMP-dependent protein kinase catalytic subunit alpha [OS=Homo sapiens]	91.338	42	159	4	Peak Found	High	Peak Found	Peak Found	Not Found	Not Found	High	High	High	High	High	High	High	High	High	High	High	High	High	High	High	High	High	High	High	High
P17655-1	Calpain-2 catalytic subunit [OS=Homo sapiens]	760.286	71	1512	40	High	High	High	High	High	High	High	High	High	High	High	High	High	High	High	High	High	High	High	High	High	High	High	High	High	High	Carbamyl [K506]
P17661	desmin [OS=Homo sapiens]	141.713	33	1723	7	Not Found	Not Found	Peak Found	Not Found	Not Found	Peak Found	Not Found	Peak Found	Peak Found	Not Found	Not Found	Not Found	Not Found	Not Found	Not Found	Not Found	Not Found	High	High	High	High	High	High	Not Found	Not Found	Peak Found	Carbamyl [K109; K407]; Acetyl [K109]
P17706-1	Tyrosine-protein phosphatase non-receptor type 2 [OS=Homo sapiens]	4.603	3	1	1	Not Found	Not Found	Not Found	Not Found	Not Found	Not Found	Not Found	Not Found	High	Not Found	Not Found	Not Found	Not Found	Not Found	Not Found	Not Found	Not Found	Not Found	Not Found	Not Found	Not Found	Not Found	Not Found	Not Found	Not Found	Not Found
P17812	CTP synthase 1 [OS=Homo sapiens]	192.476	50	391	21	High	High	High	High	High	High	High	High	High	High	High	High	High	High	High	High	High	High	High	High	High	High	High	High	High	High
P17813	Endoglin [OS=Homo sapiens]	122.286	35	185	14	High	High	High	High	High	High	High	High	High	High	High	High	High	High	High	High	High	High	High	High	High	High	High	High	High	High
P17844	probable ATP-dependent RNA helicase DDX5 [OS=Homo sapiens]	263.576	58	771	22	High	High	High	High	High	High	High	High	High	High	High	High	High	High	High	High	High	High	High	High	High	High	High	High	High	High
P17858-1	ATP-dependent 6-phosphofructokinase, liver type [OS=Homo sapiens]	194.763	46	333	18	High	High	High	Peak Found	Peak Found	High	High	High	High	High	High	High	High	High	High	High	High	High	High	High	High	High	High	High	High	High
P17900	Ganglioside GM2 activator [OS=Homo sapiens]	20.103	20	26	3	Peak Found	Peak Found	Peak Found	Not Found	Peak Found	Peak Found	High	Peak Found	Peak Found	Peak Found	Peak Found	Peak Found	Peak Found	Peak Found	High	High	High	High	High	High	Peak Found	Peak Found	Peak Found	High	High	High
P17931	Galectin-3 [OS=Homo sapiens]	106.959	38	377	8	High	High	High	High	High	High	High	High	High	High	High	High	High	High	High	High	High	High	High	High	High	High	High	High	High	High
P17980	26S proteasome regulatory subunit 6A [OS=Homo sapiens]	327.882	68	666	24	High	High	High	High	High	High	High	High	High	High	High	High	High	High	High	High	High	High	High	High	High	High	High	High	High	High	Carbamyl [K146]; Acetyl [N-Term]
P17987	T-complex protein 1 subunit alpha [OS=Homo sapiens]	522.079	80	1319	36	High	High	High	High	High	High	High	High	High	High	High	High	High	High	High	High	High	High	High	High	High	High	High	High	High	High	Acetyl [N-Term]
P18031	Tyrosine-protein phosphatase non-receptor type 1 [OS=Homo sapiens]	93.316	42	150	13	High	High	High	High	High	High	High	High	High	High	High	High	High	High	High	High	High	High	High	High	High	High	High	High	High	High	Acetyl [N-Term]
P18077	60S ribosomal protein L35a [OS=Homo sapiens]	44.74	49	298	8	High	High	High	High	High	High	High	High	High	High	High	High	High	High	High	High	High	High	High	High	High	High	High	High	High	High	Carbamyl [K63]
P18084	Integrin beta-5 [OS=Homo sapiens]	144.124	34	121	14	Peak Found	Peak Found	Peak Found	Peak Found	Peak Found	Peak Found	High	High	High	High	High	High	High	High	High	High	High	High	High	High	High	High	High	High	High	High
P18085	ADP-ribosylation factor 4 [OS=Homo sapiens]	251.715	82	682	12	High	High	High	High	High	High	High	High	High	High	High	High	High	High	High	High	High	High	High	High	High	High	High	High	High	High
P18124	60S ribosomal protein L7 [OS=Homo sapiens]	216.48	54	881	19	High	High	High	High	High	High	High	High	High	High	High	High	High	High	High	High	High	High	High	High	High	High	High	High	High	High	Carbamyl [K77]
P18206	Vinculin [OS=Homo sapiens]	1120.12	70	3742	75	High	High	High	High	High	High	High	High	High	High	High	High	High	High	High	High	High	High	High	High	High	High	High	High	High	High	Acetyl [K387]; Met-loss [N-Term]
P18583-5	Isoform D of Protein SON [OS=Homo sapiens]	34.941	4	34	6	Peak Found	High	High	Peak Found	Not Found	Peak Found	High	High	High	High	High	Peak Found	High	High	High	High	High	Peak Found	Peak Found	High	High	High	High	Peak Found	Peak Found	Peak Found	Met-loss+Acetyl [N-Term]
P18615	Negative elongation factor E [OS=Homo sapiens]	6.346	5	1	1	Not Found	Not Found	Not Found	Not Found	Not Found	Not Found	Not Found	Not Found	Not Found	Not Found	Not Found	Not Found	Not Found	Not Found	Not Found	Not Found	Not Found	Not Found	Not Found	High	Not Found	Not Found	Not Found	Not Found	Not Found	Not Found
P18621	60S ribosomal protein L17 [OS=Homo sapiens]	128.083	51	439	11	High	High	High	High	High	High	High	High	High	High	High	High	High	High	High	High	High	High	High	High	High	High	High	High	High	High	Carbamyl [K86]; Met-loss [N-Term]
P18669	Phosphoglycerate mutase 1 [OS=Homo sapiens]	541.771	83	1651	16	High	High	High	High	High	High	High	High	High	High	High	High	High	High	High	High	High	High	High	High	High	High	High	High	High	High	Carbamyl [K225; K241]
P18754-1	Regulator of chromosome condensation [OS=Homo sapiens]	117.585	57	135	11	High	Peak Found	High	Peak Found	Peak Found	Peak Found	High	High	High	High	High	High	High	High	High	High	High	High	High	High	High	High	High	High	High	High
P18859	ATP synthase-coupling factor 6, mitochondrial [OS=Homo sapiens]	46.057	45	23	4	Peak Found	Not Found	Peak Found	Not Found	Not Found	Not Found	Peak Found	High	Peak Found	Peak Found	Peak Found	Peak Found	Peak Found	Peak Found	Peak Found	Peak Found	High	Peak Found	High	High	Peak Found	High	High	High	High	High
P19013	Keratin, type II cytoskeletal 4 [OS=Homo sapiens]	11.548	5	33	0	Not Found	Not Found	Not Found	Not Found	Not Found	Not Found	Not Found	Not Found	Not Found	Not Found	Not Found	Not Found	Not Found	Not Found	Not Found	Not Found	Not Found	Not Found	Not Found	Not Found	Not Found	Not Found	Not Found	Not Found	Not Found	Not Found
P19105	myosin regulatory light chain 12A [OS=Homo sapiens]	291.623	81	976	1	Not Found	Not Found	Not Found	Not Found	Not Found	Not Found	High	High	Not Found	High	High	Not Found	High	Not Found	Not Found	Not Found	Not Found	Not Found	Not Found	Not Found	Not Found	Not Found	Not Found	High	High	High	Carbamyl [K50]
P19174-1	1-phosphatidylinositol 4,5-bisphosphate phosphodiesterase gamma-1 [OS=Homo sapiens]	7.672	2	4	2	Not Found	Peak Found	Not Found	Not Found	Not Found	Not Found	Peak Found	Not Found	High	High	High	Peak Found	Peak Found	Peak Found	Peak Found	Peak Found	Peak Found	Peak Found	Peak Found	Peak Found	Peak Found	Peak Found	Not Found	Not Found	Not Found	Not Found
P19338	Nucleolin [OS=Homo sapiens]	482.192	44	1636	40	High	High	High	High	High	High	High	High	High	High	High	High	High	High	High	High	High	High	High	High	High	High	High	High	High	High	Carbamyl [K348]
P19367-1	Hexokinase-1 [OS=Homo sapiens]	349.473	53	880	37	High	High	High	High	High	High	High	High	High	High	High	High	High	High	High	High	High	High	High	High	High	High	High	High	High	High	Carbamyl [K333]; Acetyl [N-Term]
P19387	DNA-directed RNA polymerase II subunit RPB3 [OS=Homo sapiens]	66.862	40	64	6	Peak Found	High	Peak Found	Peak Found	High	Peak Found	High	High	High	High	High	High	High	High	High	High	High	High	High	High	High	High	High	High	High	High	Met-loss [N-Term]
P19388	DNA-directed RNA polymerases I, II, and III subunit RPABC1 [OS=Homo sapiens]	36.991	36	34	5	High	High	Peak Found	Peak Found	Peak Found	Peak Found	High	High	High	High	High	High	High	Peak Found	High	High	High	High	High	High	Peak Found	Peak Found	Peak Found	Peak Found	Peak Found	High
P19404	NADH dehydrogenase [ubiquinone] flavoprotein 2, mitochondrial [OS=Homo sapiens]	41.81	32	113	6	High	High	High	Not Found	Peak Found	Not Found	High	High	High	High	High	High	High	High	High	High	High	High	High	High	High	High	High	High	High	High
P19474	E3 ubiquitin-protein ligase TRIM21 [OS=Homo sapiens]	8.76	7	4	3	High	Peak Found	Peak Found	Peak Found	Not Found	Not Found	High	High	Peak Found	Peak Found	Peak Found	Peak Found	Peak Found	Peak Found	Peak Found	Peak Found	Peak Found	Peak Found	Peak Found	Peak Found	Peak Found	Peak Found	Peak Found	Not Found	Not Found	Not Found
P19525	interferon-induced, double-stranded RNA-activated protein kinase [OS=Homo sapiens]	112.485	35	196	12	High	High	Peak Found	Peak Found	Peak Found	Peak Found	High	High	High	High	High	High	High	High	High	High	High	High	High	High	High	High	High	High	High	High	Met-loss+Acetyl [N-Term]
P19623	spermidine synthase [OS=Homo sapiens]	227.358	89	441	19	High	High	High	Not Found	Not Found	Peak Found	High	High	High	High	High	High	High	High	High	High	High	High	High	High	High	High	High	High	High	High	Acetyl [N-Term]
P19634-1	Sodium/hydrogen exchanger 1 [OS=Homo sapiens]	7.905	2	4	1	Not Found	Not Found	Not Found	Not Found	Not Found	Not Found	Peak Found	Not Found	Not Found	Not Found	Not Found	Not Found	Not Found	Peak Found	Not Found	Not Found	Not Found	Not Found	Not Found	Not Found	Not Found	Not Found	Not Found	High	High	High
P19784	casein kinase II subunit alpha' [OS=Homo sapiens]	18.754	25	18	5	Not Found	Peak Found	Peak Found	Not Found	Not Found	Peak Found	Peak Found	High	High	High	High	High	Peak Found	High	High	High	Peak Found	Peak Found	High	Peak Found	Peak Found	Peak Found	Peak Found	Peak Found	High	High
P19823	Inter-alpha-trypsin inhibitor heavy chain H2 [OS=Homo sapiens]	54.991	9	45	7	Not Found	Not Found	Peak Found	Peak Found	High	High	Peak Found	Peak Found	Peak Found	Peak Found	Peak Found	Peak Found	Peak Found	Peak Found	Peak Found	Peak Found	Peak Found	Not Found	Peak Found	Peak Found	Peak Found	Peak Found	Peak Found	High	High	High
P19827-1	Inter-alpha-trypsin inhibitor heavy chain H1 [OS=Homo sapiens]	19.096	2	39	2	Not Found	Not Found	Not Found	Not Found	Not Found	Not Found	High	High	High	High	High	High	High	High	High	High	High	High	High	High	Peak Found	Peak Found	Peak Found	High	High	High	Carbamyl [K577]
P19838	Nuclear factor NF-kappa-B p105 subunit [OS=Homo sapiens]	14.398	4	40	2	Peak Found	Peak Found	Peak Found	Peak Found	Peak Found	Peak Found	High	High	High	High	High	High	High	High	High	High	High	High	High	High	High	High	High	High	High	High
P19971	thymidine phosphorylase [OS=Homo sapiens]	18.281	12	8	3	Not Found	Not Found	Not Found	Not Found	Not Found	Not Found	High	High	High	High	High	Peak Found	Not Found	Not Found	Peak Found	Peak Found	Peak Found	Peak Found	Peak Found	Peak Found	Not Found	Not Found	Not Found	Not Found	Not Found	Not Found
P20020	Plasma membrane calcium-transporting ATPase 1 [OS=Homo sapiens]	124.766	19	229	7	High	High	High	Not Found	Not Found	Not Found	High	High	High	Peak Found	High	Peak Found	Peak Found	Peak Found	Peak Found	Peak Found	Peak Found	Peak Found	Peak Found	Peak Found	Peak Found	Peak Found	Peak Found	High	High	High
P20042	Eukaryotic translation initiation factor 2 subunit 2 [OS=Homo sapiens]	146.158	54	252	20	High	High	High	High	High	High	High	High	High	High	High	High	High	High	High	High	High	High	High	High	High	High	High	High	High	High
P20073-1	Annexin A7 [OS=Homo sapiens]	129.915	34	329	15	High	High	High	High	High	High	High	High	High	High	High	High	High	High	High	High	High	High	High	High	High	High	High	High	High	High
P20290-2	Isoform 2 of Transcription factor BTF3 [OS=Homo sapiens]	213.431	68	421	9	High	High	High	High	High	High	High	High	High	High	High	High	High	High	High	High	High	High	High	High	High	High	High	High	High	High	Carbamyl [K50]
P20337	Ras-related protein Rab-3B [OS=Homo sapiens]	126.557	53	295	7	High	High	High	High	High	High	High	High	High	High	High	High	High	High	High	High	High	High	High	High	High	High	High	High	High	High
P20338	Ras-related protein Rab-4A [OS=Homo sapiens]	15.476	18	16	2	Not Found	Not Found	Not Found	Not Found	Not Found	Not Found	Peak Found	Not Found	Peak Found	High	Peak Found	Peak Found	Peak Found	Peak Found	Not Found	Peak Found	Peak Found	Not Found	Peak Found	Not Found	Not Found	Not Found	Not Found	High	High	High	Met-loss+Acetyl [N-Term]
P20339	Ras-related protein Rab-5A [OS=Homo sapiens]	79.127	43	156	5	Peak Found	High	High	Not Found	Peak Found	Not Found	High	High	High	High	High	High	High	High	High	High	High	High	High	High	High	High	High	High	High	High
P20340-2	Isoform 2 of Ras-related protein Rab-6A [OS=Homo sapiens]	69.999	49	191	8	High	High	High	High	High	High	High	High	High	High	High	High	High	High	High	High	High	High	High	High	High	High	High	High	High	High	Met-loss+Acetyl [N-Term]
P20618	proteasome subunit beta type-1 [OS=Homo sapiens]	125.644	68	247	12	High	High	High	Peak Found	Peak Found	Peak Found	High	High	High	High	High	High	High	High	High	High	High	High	High	High	High	High	High	High	High	High	Acetyl [K109]
P20645	Cation-dependent mannose-6-phosphate receptor [OS=Homo sapiens]	44.498	21	51	3	High	High	High	Not Found	Not Found	Peak Found	High	High	High	High	High	High	High	High	High	High	High	High	High	High	High	High	High	High	High	High
P20648	Potassium-transporting ATPase alpha chain 1 [OS=Homo sapiens]	32.13	5	63	1	Not Found	Not Found	Not Found	Not Found	Not Found	Not Found	Peak Found	Not Found	Not Found	Peak Found	Peak Found	Peak Found	Peak Found	Peak Found	Peak Found	Peak Found	Peak Found	Not Found	Not Found	Peak Found	Peak Found	Peak Found	Peak Found	High	Peak Found	Peak Found
P20674	Cytochrome c oxidase subunit 5A, mitochondrial [OS=Homo sapiens]	42.519	47	74	5	High	Peak Found	Peak Found	Peak Found	Peak Found	High	High	High	High	High	High	High	High	High	High	Peak Found	High	High	High	High	High	High	High	High	High	High
P20700	Lamin-B1 [OS=Homo sapiens]	209.119	59	436	27	High	High	High	High	High	High	High	High	High	High	High	High	High	High	High	High	High	High	High	High	High	High	High	Peak Found	Peak Found	Peak Found	Carbamyl [K379]
P20810-2	Isoform 2 of Calpastatin [OS=Homo sapiens]	429.834	62	772	1	Not Found	Not Found	Not Found	Not Found	Not Found	Not Found	Peak Found	High	Not Found	Not Found	Not Found	High	High	High	Not Found	Not Found	Not Found	Not Found	Not Found	Peak Found	Not Found	Not Found	Not Found	Not Found	Not Found	Not Found	Acetyl [K102]; Carbamyl [K102]
P20810-6	Isoform 6 of Calpastatin [OS=Homo sapiens]	451.617	60	833	5	High	High	High	High	High	High	High	High	High	High	High	High	High	High	High	High	High	High	High	High	High	Peak Found	High	Peak Found	High	High	Met-loss+Acetyl [N-Term]; Acetyl [K185]; Carbamyl [K185]
P20839	Inosine-5'-monophosphate dehydrogenase 1 [OS=Homo sapiens]	13.806	7	35	2	High	High	High	High	Peak Found	High	High	High	High	High	High	High	High	High	Peak Found	High	High	High	High	High	High	High	High	Not Found	Peak Found	Not Found
P20908	Collagen alpha-1(V) chain [OS=Homo sapiens]	177.738	16	142	16	Peak Found	High	Peak Found	Not Found	Not Found	Not Found	High	High	High	High	High	High	High	High	High	High	High	High	High	High	High	High	High	High	High	High
P20933	N(4)-(beta-N-acetylglucosaminyl)-L-asparaginase [OS=Homo sapiens]	54.249	22	67	4	High	High	High	High	High	Peak Found	High	High	High	High	High	High	High	High	High	High	High	High	High	High	High	High	High	High	High	High
P20936-1	ras GTPase-activating protein 1 [OS=Homo sapiens]	113.108	24	81	15	Peak Found	Peak Found	Peak Found	Not Found	Not Found	Not Found	High	High	High	High	High	High	High	High	High	High	High	High	High	Peak Found	Peak Found	Peak Found	Peak Found	High	High	High
P20962	Parathymosin [OS=Homo sapiens]	41.972	27	309	5	High	High	High	High	High	High	High	High	High	High	High	High	High	High	High	High	High	High	High	High	High	High	High	High	High	High	Carbamyl [K4]
P21266	glutathione S-transferase Mu 3 [OS=Homo sapiens]	149.377	78	321	19	High	High	High	Peak Found	Peak Found	High	High	High	High	High	High	High	High	High	High	High	High	High	High	High	High	High	High	High	High	High	Met-loss+Acetyl [N-Term]
P21281	V-type proton ATPase subunit B, brain isoform [OS=Homo sapiens]	353.15	82	635	21	High	High	High	High	High	High	High	High	High	High	High	High	High	High	High	High	High	High	High	High	High	High	High	High	High	High
P21283	V-type proton ATPase subunit C 1 [OS=Homo sapiens]	47.465	30	31	7	Peak Found	High	Peak Found	Peak Found	Peak Found	Not Found	High	Peak Found	High	High	High	High	High	Peak Found	High	High	High	High	Peak Found	Peak Found	Peak Found	High	Peak Found	High	High	High	Met-loss+Acetyl [N-Term]
P21291	Cysteine and glycine-rich protein 1 [OS=Homo sapiens]	201.972	60	358	8	High	High	High	High	High	High	High	High	High	High	High	High	High	High	High	High	High	High	High	High	High	High	High	High	High	High
P21333-2	Isoform 2 of Filamin-A [OS=Homo sapiens]	3357.13	76	10976	155	High	High	High	High	High	High	High	High	High	High	High	High	High	High	High	High	High	High	High	High	High	High	High	High	High	High	Carbamyl [K1372; K2615]
P21359-1	Neurofibromin [OS=Homo sapiens]	5.496	1	4	1	Not Found	Not Found	Not Found	Not Found	Not Found	Not Found	High	Peak Found	Peak Found	High	High	Peak Found	Not Found	High	Not Found	Not Found	Not Found	Peak Found	Not Found	Not Found	Not Found	Not Found	Not Found	Not Found	Not Found	Not Found
P21589-1	5'-nucleotidase [OS=Homo sapiens]	553.449	64	1300	33	High	High	High	High	High	High	High	High	High	High	High	High	High	High	High	High	High	High	High	High	High	High	High	High	High	High	Carbamyl [K274]
P21796	voltage-dependent anion-selective channel protein 1 [OS=Homo sapiens]	404.761	81	1108	18	High	High	High	High	High	High	High	High	High	High	High	High	High	High	High	High	High	High	High	High	High	High	High	High	High	High	Carbamyl [K201]; Met-loss+Acetyl [N-Term]
P21912	Succinate dehydrogenase [ubiquinone] iron-sulfur subunit, mitochondrial [OS=Homo sapiens]	24.197	24	49	5	Peak Found	High	High	Peak Found	Not Found	Not Found	High	High	High	High	High	High	High	High	High	High	High	High	High	High	Peak Found	High	High	High	High	High
P21926	CD9 antigen [OS=Homo sapiens]	48.686	25	98	4	High	High	High	Peak Found	Peak Found	Peak Found	High	High	High	High	High	High	High	High	High	High	High	High	High	High	High	High	High	High	High	High
P21964-1	Catechol O-methyltransferase [OS=Homo sapiens]	266.987	67	409	19	High	High	High	Peak Found	High	High	High	High	High	High	High	High	High	High	High	High	High	High	High	High	High	High	High	High	High	High	Carbamyl [K212]
P22033	Methylmalonyl-CoA mutase, mitochondrial [OS=Homo sapiens]	19.458	7	18	3	Peak Found	High	Not Found	Not Found	Not Found	Not Found	High	High	High	High	High	High	High	Peak Found	High	High	High	Peak Found	Peak Found	Peak Found	Peak Found	High	High	Peak Found	Peak Found	Peak Found
P22059	Oxysterol-binding protein 1 [OS=Homo sapiens]	27.003	10	48	5	High	High	High	Not Found	Not Found	Not Found	High	High	High	High	High	High	High	High	High	High	High	High	High	High	High	High	High	High	High	High
P22061	protein-L-isoaspartate(D-aspartate) O-methyltransferase [OS=Homo sapiens]	169.33	88	329	13	High	High	High	High	High	High	High	High	High	High	High	High	High	High	High	High	High	High	High	High	High	High	High	High	High	High	Carbamyl [K206]
P22087	rRNA 2'-O-methyltransferase fibrillarin [OS=Homo sapiens]	120.847	62	234	15	High	High	High	Peak Found	High	Peak Found	High	High	High	High	High	High	High	High	High	High	High	High	High	High	High	High	High	High	High	High
P22090	40S ribosomal protein S4, Y isoform 1 [OS=Homo sapiens]	117.105	46	525	1	Not Found	Not Found	Not Found	Not Found	Not Found	Not Found	Not Found	Not Found	Not Found	Not Found	Not Found	Not Found	Not Found	High	High	High	High	Not Found	Not Found	Not Found	Peak Found	High	Not Found	Not Found	Not Found	Not Found
P22102-1	trifunctional purine biosynthetic protein adenosine-3 [OS=Homo sapiens]	253.223	56	447	32	High	High	High	High	High	High	High	High	High	High	High	High	High	High	High	High	High	High	High	High	High	High	High	High	High	High
P22234	multifunctional protein ADE2 [OS=Homo sapiens]	196.247	62	477	19	High	High	High	High	High	High	High	High	High	High	High	High	High	High	High	High	High	High	High	High	High	High	High	High	High	High	Met-loss+Acetyl [N-Term]
P22307-1	Non-specific lipid-transfer protein [OS=Homo sapiens]	250.843	52	625	22	High	High	High	High	High	High	High	High	High	High	High	High	High	High	High	High	High	High	High	High	High	High	High	High	High	High	Carbamyl [K443; K492]
P22314-2	Isoform 2 of Ubiquitin-like modifier-activating enzyme 1 [OS=Homo sapiens]	1062.3	79	2441	56	High	High	High	High	High	High	High	High	High	High	High	High	High	High	High	High	High	High	High	High	High	High	High	High	High	High	Carbamyl [K3; K345; K553]; Met-loss [N-Term]
P22392-2	Isoform 3 of Nucleoside diphosphate kinase B [OS=Homo sapiens]	337.851	79	1465	7	High	High	High	High	High	High	High	High	High	High	High	High	High	High	High	High	High	High	High	High	High	High	High	High	High	High	Carbamyl [K12; K127; K133]
P22413	Ectonucleotide pyrophosphatase/phosphodiesterase family member 1 [OS=Homo sapiens]	156.751	33	135	16	Peak Found	Peak Found	Peak Found	Not Found	Peak Found	Peak Found	High	Peak Found	High	High	High	Peak Found	High	Peak Found	High	High	High	High	High	High	High	High	High	High	High	High
P22570	NADPH:adrenodoxin oxidoreductase, mitochondrial [OS=Homo sapiens]	59.52	34	57	10	High	High	High	Not Found	Not Found	Not Found	High	High	High	High	High	Peak Found	High	High	Peak Found	High	High	High	High	High	High	High	High	High	High	High
P22626	heterogeneous nuclear ribonucleoproteins A2/B1 [OS=Homo sapiens]	638.115	70	2617	28	High	High	High	High	High	High	High	High	High	High	High	High	High	High	High	High	High	High	High	High	High	High	High	High	High	High	Carbamyl [K22; K104; K113; K120]
P22692	insulin-like growth factor-binding protein 4 [OS=Homo sapiens]	30.925	10	43	2	Peak Found	High	Peak Found	High	Peak Found	Peak Found	High	High	Peak Found	Peak Found	High	High	High	High	High	High	High	High	High	High	High	High	High	High	High	High
P22694-1	cAMP-dependent protein kinase catalytic subunit beta [OS=Homo sapiens]	54.603	26	65	1	Not Found	Not Found	Not Found	Not Found	Not Found	Not Found	High	High	High	Peak Found	Peak Found	Peak Found	Peak Found	Peak Found	Peak Found	Peak Found	Peak Found	Peak Found	Peak Found	Peak Found	Not Found	Peak Found	Not Found	Peak Found	Peak Found	Peak Found
P22695	Cytochrome b-c1 complex subunit 2, mitochondrial [OS=Homo sapiens]	198.144	58	283	17	High	High	High	High	High	High	High	High	High	High	High	High	High	High	High	High	High	High	High	High	High	High	High	High	High	High
P22830-1	Ferrochelatase, mitochondrial [OS=Homo sapiens]	19.214	5	18	1	Not Found	Not Found	Not Found	Not Found	Not Found	Not Found	High	High	High	High	High	Peak Found	High	High	High	High	High	Peak Found	Peak Found	Peak Found	Not Found	Not Found	Not Found	High	High	Peak Found
P23142	Fibulin-1 [OS=Homo sapiens]	10.244	3	5	2	Not Found	Peak Found	Peak Found	Peak Found	Peak Found	Peak Found	Peak Found	Peak Found	Not Found	Peak Found	Peak Found	Peak Found	Peak Found	Peak Found	Peak Found	Peak Found	Not Found	Peak Found	Peak Found	Peak Found	Peak Found	Peak Found	Peak Found	High	High	High
P23193	Transcription elongation factor A protein 1 [OS=Homo sapiens]	46.823	33	89	8	High	High	High	High	High	High	High	High	High	High	High	High	High	High	High	High	High	High	High	High	High	High	High	Not Found	Not Found	High
P23219	Prostaglandin G/H synthase 1 [OS=Homo sapiens]	51.287	27	27	8	Peak Found	Peak Found	Peak Found	Not Found	Not Found	Not Found	High	High	Peak Found	Peak Found	Peak Found	High	High	High	Peak Found	Peak Found	High	Peak Found	Peak Found	Peak Found	Peak Found	Peak Found	Peak Found	Not Found	Not Found	Not Found
P23229-1	integrin alpha-6 [OS=Homo sapiens]	223.012	36	245	27	High	High	High	High	High	High	High	High	High	High	High	High	High	High	High	High	High	High	High	High	High	High	High	Peak Found	Peak Found	Peak Found
P23246-1	splicing factor, proline- and glutamine-rich [OS=Homo sapiens]	314.435	46	867	25	High	High	High	High	High	High	High	High	High	High	High	High	High	High	High	High	High	High	High	High	High	High	High	High	High	High
P23258	tubulin gamma-1 chain [OS=Homo sapiens]	98.282	57	140	12	High	High	High	Not Found	Not Found	Not Found	High	High	High	High	High	High	High	High	High	High	High	High	High	High	High	High	High	High	High	Peak Found
P23284	peptidyl-prolyl cis-trans isomerase B [OS=Homo sapiens]	248.846	62	1450	20	High	High	High	High	High	High	High	High	High	High	High	High	High	High	High	High	High	High	High	High	High	High	High	High	High	High	Carbamyl [K192; K195]
P23368-1	NAD-dependent malic enzyme, mitochondrial [OS=Homo sapiens]	108.94	46	90	13	High	High	High	Not Found	Not Found	Not Found	High	High	High	High	High	High	High	High	High	High	High	High	High	High	High	High	High	Peak Found	High	Peak Found
P23396-1	40S ribosomal protein S3 [OS=Homo sapiens]	211.911	77	869	21	High	High	High	High	High	High	High	High	High	High	High	High	High	High	High	High	High	High	High	High	High	High	High	High	High	High	Carbamyl [K202; K214; K230]; Acetyl [K214]
P23434	Glycine cleavage system H protein, mitochondrial [OS=Homo sapiens]	8.411	12	8	1	Not Found	Not Found	Not Found	Not Found	Not Found	Not Found	High	High	Peak Found	High	High	Peak Found	Peak Found	Peak Found	Peak Found	Peak Found	High	High	High	High	Not Found	Not Found	Not Found	Not Found	Not Found	Not Found
P23497	Nuclear autoantigen Sp-100 [OS=Homo sapiens]	42.428	11	164	1	Peak Found	Peak Found	Peak Found	Not Found	Not Found	Not Found	High	Peak Found	High	High	Peak Found	Peak Found	High	High	High	High	High	Peak Found	Peak Found	High	Peak Found	Peak Found	Not Found	Peak Found	Peak Found	Peak Found
P23497-7	Isoform 7 of Nuclear autoantigen Sp-100 [OS=Homo sapiens]	31.728	18	76	1	Peak Found	High	High	Not Found	Not Found	Not Found	Peak Found	Peak Found	Peak Found	Peak Found	Peak Found	High	Peak Found	Peak Found	Peak Found	Peak Found	Peak Found	High	High	Peak Found	Peak Found	Peak Found	Not Found	Peak Found	Peak Found	High	Met-loss [N-Term]
P23526-1	Adenosylhomocysteinase [OS=Homo sapiens]	134.13	45	404	17	High	High	High	High	High	High	High	High	High	High	High	High	High	High	High	High	High	High	High	High	High	High	High	High	High	High	Carbamyl [K389]
P23528	Cofilin-1 [OS=Homo sapiens]	553.956	98	3697	19	High	High	High	High	High	High	High	High	High	High	High	High	High	High	High	High	High	High	High	High	High	High	High	High	High	High	Carbamyl [K22; K34; K53; K73; K96; K112; K114; K121; K132; K152; K164]; Met-loss+Acetyl [N-Term]; Acetyl [K53]
P23588	eukaryotic translation initiation factor 4B [OS=Homo sapiens]	166.009	40	402	18	High	High	High	High	High	High	High	High	High	High	High	High	High	High	High	High	High	High	High	High	High	High	High	High	High	High
P23634-1	Plasma membrane calcium-transporting ATPase 4 [OS=Homo sapiens]	371.725	41	608	26	High	High	High	High	High	High	High	High	High	High	High	High	High	High	High	High	High	High	High	High	High	High	High	High	High	High
P23743-1	diacylglycerol kinase alpha [OS=Homo sapiens]	36.195	13	27	5	Not Found	Peak Found	High	Not Found	Not Found	Not Found	Peak Found	Peak Found	Peak Found	Peak Found	Peak Found	High	High	High	High	High	High	Peak Found	Peak Found	High	High	High	High	High	High	High
P23919	thymidylate kinase [OS=Homo sapiens]	55.621	75	152	15	High	High	High	High	High	High	High	High	High	High	High	High	High	High	High	High	High	High	High	High	High	High	High	High	High	High
P23921	Ribonucleoside-diphosphate reductase large subunit [OS=Homo sapiens]	79.054	23	101	10	High	High	High	Not Found	Not Found	Not Found	High	High	High	High	High	High	High	High	High	High	High	High	High	High	High	High	High	Peak Found	Not Found	Peak Found
P24385	G1/S-specific cyclin-D1 [OS=Homo sapiens]	57.974	40	58	8	High	Peak Found	Peak Found	Not Found	Not Found	Not Found	Peak Found	Peak Found	High	High	High	High	High	High	High	High	High	High	High	High	High	High	High	High	High	High
P24386-1	rab proteins geranylgeranyltransferase component A 1 [OS=Homo sapiens]	15.499	4	6	2	High	Not Found	Not Found	Not Found	Not Found	Not Found	Peak Found	High	Peak Found	High	High	High	Peak Found	High	Peak Found	Peak Found	Peak Found	Peak Found	Not Found	Peak Found	Peak Found	Peak Found	Peak Found	Not Found	Peak Found	Not Found
P24390	ER lumen protein-retaining receptor 1 [OS=Homo sapiens]	6.011	9	2	1	Not Found	Not Found	Not Found	Not Found	Not Found	Not Found	High	Peak Found	High	Peak Found	Peak Found	Peak Found	Peak Found	Peak Found	Peak Found	Peak Found	Peak Found	Peak Found	Not Found	Not Found	Peak Found	Peak Found	Peak Found	Not Found	Not Found	Not Found
P24534	Elongation factor 1-beta [OS=Homo sapiens]	173.09	78	697	12	High	High	High	High	High	High	High	High	High	High	High	High	High	High	High	High	High	High	High	High	High	High	High	High	High	High	Carbamyl [K133]; Met-loss [N-Term]
P24539	ATP synthase F(0) complex subunit B1, mitochondrial [OS=Homo sapiens]	61.302	32	110	7	High	High	High	Peak Found	Peak Found	Not Found	High	High	High	High	High	High	High	High	High	High	High	High	High	High	High	High	High	High	High	High
P24593	Insulin-like growth factor-binding protein 5 [OS=Homo sapiens]	33.266	20	60	4	High	High	High	Not Found	Not Found	Not Found	High	High	High	High	High	High	High	High	High	High	High	High	High	High	High	High	Peak Found	High	High	High
P24666-1	Low molecular weight phosphotyrosine protein phosphatase [OS=Homo sapiens]	86.882	62	216	2	Peak Found	Peak Found	High	Not Found	Not Found	Not Found	High	High	High	High	High	High	High	High	Peak Found	Not Found	Peak Found	High	High	High	High	High	High	Peak Found	High	Peak Found
P24752	Acetyl-CoA acetyltransferase, mitochondrial [OS=Homo sapiens]	242.976	70	589	19	High	High	High	High	High	High	High	High	High	High	High	High	High	High	High	High	High	High	High	High	High	High	High	High	High	High
P24821	Tenascin [OS=Homo sapiens]	88.292	13	46	15	Not Found	Not Found	Peak Found	Not Found	Not Found	Not Found	Peak Found	Not Found	Peak Found	Peak Found	Peak Found	Peak Found	Peak Found	Peak Found	High	High	High	High	High	High	High	High	High	Peak Found	Peak Found	Peak Found
P24844-1	Myosin regulatory light polypeptide 9 [OS=Homo sapiens]	231.187	80	733	5	High	High	High	High	High	High	High	High	High	High	High	High	High	High	High	High	High	High	High	High	High	High	High	High	High	High	Carbamyl [K51]
P24928	DNA-directed RNA polymerase II subunit RPB1 [OS=Homo sapiens]	26.201	3	7	3	Peak Found	High	Peak Found	Peak Found	Peak Found	Peak Found	Peak Found	Not Found	High	High	High	Peak Found	Peak Found	Peak Found	High	Peak Found	High	Not Found	Peak Found	Peak Found	Peak Found	Peak Found	Peak Found	Peak Found	Peak Found	Peak Found
P25116	Proteinase-activated receptor 1 [OS=Homo sapiens]	8.787	4	2	2	Not Found	Not Found	Not Found	Not Found	Not Found	Not Found	Not Found	High	Not Found	Not Found	Not Found	Not Found	Not Found	High	Not Found	Not Found	Not Found	Not Found	Not Found	Not Found	Not Found	Not Found	Not Found	Not Found	Not Found	Not Found
P25205	DNA replication licensing factor mcm3 [OS=Homo sapiens]	129.793	37	161	18	High	High	High	Not Found	Peak Found	High	High	High	High	High	High	High	High	High	High	High	High	High	High	High	High	High	High	Peak Found	Not Found	Peak Found	Met-loss+Acetyl [N-Term]
P25325	3-mercaptopyruvate sulfurtransferase [OS=Homo sapiens]	72.848	42	111	7	High	High	Peak Found	High	Peak Found	High	High	High	High	High	High	High	High	High	High	High	High	High	High	High	High	High	High	High	High	High
P25398	40S ribosomal protein S12 [OS=Homo sapiens]	178.778	79	687	11	High	High	High	High	High	High	High	High	High	High	High	High	High	High	High	High	High	High	High	High	High	High	High	High	High	High	Carbamyl [K102]; Met-loss+Acetyl [N-Term]
P25445-1	Tumor necrosis factor receptor superfamily member 6 [OS=Homo sapiens]	28.65	17	36	3	High	High	High	Not Found	High	Not Found	High	High	High	High	High	High	High	High	High	High	High	High	High	Peak Found	High	High	High	High	Peak Found	High
P25685	dnaJ homolog subfamily B member 1 [OS=Homo sapiens]	69.018	36	72	8	Peak Found	Peak Found	Peak Found	Not Found	Peak Found	Not Found	High	High	High	High	High	High	High	High	High	High	High	High	High	High	High	High	High	Peak Found	Peak Found	High
P25686-3	DnaJ homolog subfamily B member 2 [OS=Homo sapiens]	14.579	17	13	4	High	Peak Found	High	Peak Found	Peak Found	Peak Found	Peak Found	Peak Found	Peak Found	Peak Found	Peak Found	Peak Found	Peak Found	High	Peak Found	Peak Found	Peak Found	High	Peak Found	High	Peak Found	Peak Found	Peak Found	High	High	High
P25705-1	ATP synthase subunit alpha, mitochondrial [OS=Homo sapiens]	510.39	66	1815	33	High	High	High	High	High	High	High	High	High	High	High	High	High	High	High	High	High	High	High	High	High	High	High	High	High	High
P25786-1	Proteasome subunit alpha type-1 [OS=Homo sapiens]	260.076	86	480	24	High	High	High	High	High	High	High	High	High	High	High	High	High	High	High	High	High	High	High	High	High	High	High	High	High	High
P25787	Proteasome subunit alpha type-2 [OS=Homo sapiens]	244.134	62	583	13	High	High	High	High	High	High	High	High	High	High	High	High	High	High	High	High	High	High	High	High	High	High	High	High	High	High
P25788-1	Proteasome subunit alpha type-3 [OS=Homo sapiens]	87.876	49	401	14	High	High	High	High	High	High	High	High	High	High	High	High	High	High	High	High	High	High	High	High	High	High	High	High	High	High	Met-loss+Acetyl [N-Term]
P25789	Proteasome subunit alpha type-4 [OS=Homo sapiens]	201.846	76	478	14	High	High	High	High	High	High	High	High	High	High	High	High	High	High	High	High	High	High	High	High	High	High	High	High	High	High	Carbamyl [K239]
P25815	Protein S100-P [OS=Homo sapiens]	5.759	18	1	1	Not Found	Not Found	Not Found	Not Found	Not Found	Not Found	Not Found	Not Found	Not Found	Not Found	Not Found	High	Not Found	Not Found	Not Found	Not Found	Not Found	Not Found	Not Found	Not Found	Not Found	Not Found	Not Found	Not Found	Not Found	Not Found	Met-loss+Acetyl [N-Term]
P26022	Pentraxin-related protein PTX3 [OS=Homo sapiens]	30.679	14	28	4	Peak Found	Peak Found	Peak Found	Peak Found	Peak Found	Peak Found	Peak Found	Peak Found	Peak Found	Peak Found	Peak Found	High	High	High	Peak Found	Peak Found	Peak Found	Peak Found	Peak Found	Peak Found	High	High	High	Peak Found	Peak Found	Peak Found
P26038	Moesin [OS=Homo sapiens]	859.546	77	3179	45	High	High	High	High	High	High	High	High	High	High	High	High	High	High	High	High	High	High	High	High	High	High	High	High	High	High	Carbamyl [K263; K296; K412]; Acetyl [K412]
P26196	Probable ATP-dependent RNA helicase DDX6 [OS=Homo sapiens]	158.765	53	225	16	High	High	High	Peak Found	High	High	High	High	High	High	High	High	High	High	High	High	High	High	High	High	High	High	High	High	High	High
P26232	Catenin alpha-2 [OS=Homo sapiens]	95.059	12	139	2	Peak Found	Peak Found	Peak Found	Peak Found	Peak Found	Not Found	High	High	High	High	High	High	High	High	High	High	High	High	High	High	High	High	High	High	High	High
P26358-1	DNA (cytosine-5)-methyltransferase 1 [OS=Homo sapiens]	7.137	2	7	2	Peak Found	Peak Found	Peak Found	Not Found	Not Found	Not Found	High	Peak Found	High	High	High	Not Found	Not Found	Not Found	Not Found	Not Found	Peak Found	Not Found	Not Found	Not Found	Peak Found	High	High	Not Found	Not Found	Not Found
P26368	Splicing factor U2AF 65 kDa subunit [OS=Homo sapiens]	180.173	48	300	14	High	High	High	Peak Found	High	High	High	High	High	High	High	High	High	High	High	High	High	High	High	High	High	High	High	High	High	High	Met-loss+Acetyl [N-Term]
P26373-1	60S ribosomal protein L13 [OS=Homo sapiens]	126.344	52	647	15	High	High	High	High	High	High	High	High	High	High	High	High	High	High	High	High	High	High	High	High	High	High	High	High	High	High	Carbamyl [K136]; Acetyl [K136]
P26440	Isovaleryl-CoA dehydrogenase, mitochondrial [OS=Homo sapiens]	20.656	12	36	4	High	High	High	Peak Found	Peak Found	High	High	High	High	Peak Found	High	High	High	High	High	High	High	High	High	High	Peak Found	High	High	Peak Found	Peak Found	Peak Found
P26572	alpha-1,3-mannosyl-glycoprotein 2-beta-N-acetylglucosaminyltransferase [OS=Homo sapiens]	30.167	12	45	4	High	High	High	Peak Found	Peak Found	Peak Found	High	High	High	High	High	High	High	High	Peak Found	Peak Found	High	Peak Found	Peak Found	Peak Found	High	High	High	High	High	High
P26583	High mobility group protein B2 [OS=Homo sapiens]	85.976	51	188	8	High	High	High	Peak Found	Peak Found	Peak Found	High	High	High	High	High	Peak Found	Peak Found	High	High	High	High	High	High	High	High	High	High	Peak Found	Peak Found	Peak Found
P26599	Polypyrimidine tract-binding protein 1 [OS=Homo sapiens]	588.163	75	1087	25	High	High	High	High	High	High	High	High	High	High	High	High	High	High	High	High	High	High	High	High	High	High	High	High	High	High	Carbamyl [K65]; Acetyl [N-Term]
P26639-1	Threonine--tRNA ligase, cytoplasmic [OS=Homo sapiens]	217.812	49	476	27	High	High	High	High	High	High	High	High	High	High	High	High	High	High	High	High	High	High	High	High	High	High	High	High	High	High
P26640	Valine--tRNA ligase [OS=Homo sapiens]	277.325	40	573	33	High	High	High	High	High	High	High	High	High	High	High	High	High	High	High	High	High	High	High	High	High	High	High	High	High	High	Met-loss+Acetyl [N-Term]
P26641	elongation factor 1-gamma [OS=Homo sapiens]	423.503	82	1414	30	High	High	High	High	High	High	High	High	High	High	High	High	High	High	High	High	High	High	High	High	High	High	High	High	High	High	Carbamyl [K277; K401]; Met-loss+Acetyl [N-Term]
P26885	Peptidyl-prolyl cis-trans isomerase FKBP2 [OS=Homo sapiens]	104.929	68	216	10	Peak Found	High	High	Not Found	Peak Found	High	High	High	High	High	High	High	High	High	High	High	High	High	High	High	High	High	High	High	High	High
P27348	14-3-3 protein theta [OS=Homo sapiens]	484.236	84	1570	18	High	High	High	High	High	High	High	High	High	High	High	High	High	High	High	High	High	High	High	High	High	High	High	High	High	High	Acetyl [N-Term]
P27361-1	mitogen-activated protein kinase 3 [OS=Homo sapiens]	138.849	55	303	8	High	High	High	High	High	High	High	High	High	High	High	High	High	High	High	High	High	High	High	High	High	High	High	High	High	High	Met-loss+Acetyl [N-Term]
P27449	V-type proton ATPase 16 kDa proteolipid subunit [OS=Homo sapiens]	54.712	35	49	3	High	Not Found	Not Found	Not Found	Not Found	Not Found	High	High	High	High	High	High	High	High	High	High	High	Peak Found	High	High	Peak Found	High	Peak Found	High	High	High	Met-loss+Acetyl [N-Term]; Carbamyl [K5]; Met-loss [N-Term]
P27487	Dipeptidyl peptidase 4 [OS=Homo sapiens]	26.632	9	10	5	Not Found	Not Found	Peak Found	Not Found	Not Found	Not Found	High	High	Peak Found	Not Found	Peak Found	Peak Found	Peak Found	Not Found	High	High	High	Peak Found	Peak Found	Peak Found	Peak Found	Peak Found	Peak Found	Peak Found	Peak Found	Peak Found
P27635	60S ribosomal protein L10 [OS=Homo sapiens]	121.789	39	509	8	High	High	High	High	High	High	High	High	High	High	High	High	High	High	High	High	High	High	High	High	High	High	High	High	High	High
P27658	collagen alpha-1(VIII) chain [OS=Homo sapiens]	14.906	6	15	3	Not Found	Not Found	Not Found	Not Found	Not Found	Not Found	Peak Found	Peak Found	Peak Found	Peak Found	Peak Found	Peak Found	Peak Found	High	High	High	High	Peak Found	Peak Found	Not Found	High	High	High	Peak Found	Peak Found	Peak Found
P27694	Replication protein A 70 kDa DNA-binding subunit [OS=Homo sapiens]	63.087	27	74	12	High	High	High	Peak Found	High	High	High	High	High	High	High	High	High	High	High	High	High	High	High	High	High	High	High	High	Peak Found	Peak Found	Acetyl [N-Term]
P27695	DNA-(apurinic or apyrimidinic site) lyase [OS=Homo sapiens]	187.585	69	334	17	High	High	High	High	High	High	High	High	High	High	High	High	High	High	High	High	High	High	High	High	High	High	High	High	High	High	Carbamyl [K203]
P27707	deoxycytidine kinase [OS=Homo sapiens]	28.019	38	17	6	High	High	Peak Found	Peak Found	Peak Found	Peak Found	Peak Found	Peak Found	Peak Found	High	Peak Found	High	Peak Found	Peak Found	High	High	High	High	Peak Found	High	High	High	High	Peak Found	Not Found	Peak Found
P27708	CAD protein [OS=Homo sapiens]	284.683	33	336	40	High	High	High	High	High	High	High	High	High	High	High	High	High	High	High	High	High	High	High	High	High	High	High	Peak Found	High	High	Met-loss+Acetyl [N-Term]
P27797	Calreticulin [OS=Homo sapiens]	858.15	75	3287	30	High	High	High	High	High	High	High	High	High	High	High	High	High	High	High	High	High	High	High	High	High	High	High	High	High	High	Carbamyl [K62; K64; K111; K143; K207; K209; K249]; Acetyl [K249]
P27816-1	Microtubule-associated protein 4 [OS=Homo sapiens]	900.289	80	2190	69	High	High	High	High	High	High	High	High	High	High	High	High	High	High	High	High	High	High	High	High	High	High	High	High	High	High	Met-loss+Acetyl [N-Term]
P27824	Calnexin [OS=Homo sapiens]	499.956	62	1189	33	High	High	High	High	High	High	High	High	High	High	High	High	High	High	High	High	High	High	High	High	High	High	High	High	High	High	Acetyl [K384; K401]; Carbamyl [K283; K384; K401]
P27986	Phosphatidylinositol 3-kinase regulatory subunit alpha [OS=Homo sapiens]	6.583	3	2	1	Not Found	Not Found	Not Found	Not Found	Not Found	Not Found	Not Found	Not Found	High	Not Found	Not Found	Not Found	Not Found	High	Not Found	Not Found	Not Found	Not Found	Not Found	Not Found	Not Found	Not Found	Not Found	Not Found	Not Found	Not Found
P28062-1	Proteasome subunit beta type-8 [OS=Homo sapiens]	60.399	58	59	10	High	High	High	Peak Found	Peak Found	Peak Found	High	High	Peak Found	High	High	High	High	High	High	High	High	High	High	High	High	High	Peak Found	Peak Found	Peak Found	Peak Found
P28065	Proteasome subunit beta type-9 [OS=Homo sapiens]	24.119	31	73	5	High	High	High	High	High	High	High	High	High	High	High	High	High	High	High	High	High	High	High	High	High	High	High	Not Found	Not Found	Not Found
P28066-1	Proteasome subunit alpha type-5 [OS=Homo sapiens]	180.151	61	341	11	High	High	High	High	High	High	High	High	High	High	High	High	High	High	High	High	High	High	High	High	High	High	High	High	High	High
P28070	Proteasome subunit beta type-4 [OS=Homo sapiens]	128.652	48	413	8	High	High	High	High	High	High	High	High	High	High	High	High	High	High	High	High	High	High	High	High	High	High	High	High	High	High
P28072	Proteasome subunit beta type-6 [OS=Homo sapiens]	123.445	66	291	9	High	High	High	High	High	High	High	High	High	High	High	High	High	High	High	High	High	High	High	High	High	High	High	High	High	High
P28074-1	proteasome subunit beta type-5 [OS=Homo sapiens]	143.461	57	301	14	High	High	High	High	High	High	High	High	High	High	High	High	High	High	High	High	High	High	High	High	High	High	High	High	High	High
P28161	Glutathione S-transferase Mu 2 [OS=Homo sapiens]	63.867	62	205	8	High	High	High	Not Found	Not Found	Peak Found	High	High	High	High	High	High	High	High	High	High	High	High	High	High	High	High	High	High	High	High
P28288	ATP-binding cassette sub-family D member 3 [OS=Homo sapiens]	47.259	18	56	8	High	High	Peak Found	Peak Found	Not Found	Peak Found	High	High	High	High	High	High	High	High	High	High	High	High	High	High	High	High	Peak Found	High	High	High
P28290	Sperm-specific antigen 2 [OS=Homo sapiens]	55.331	13	38	9	Peak Found	Peak Found	High	Not Found	Not Found	Not Found	Peak Found	High	High	High	Peak Found	Peak Found	Peak Found	High	Peak Found	High	High	High	High	High	High	Peak Found	Peak Found	High	High	High
P28300	Protein-lysine 6-oxidase [OS=Homo sapiens]	155.848	60	163	14	High	High	High	Peak Found	Peak Found	Peak Found	High	High	High	High	High	High	High	High	High	High	High	High	High	High	High	High	High	High	High	High
P28331-1	NADH-ubiquinone oxidoreductase 75 kDa subunit, mitochondrial [OS=Homo sapiens]	179.294	50	353	23	High	High	High	High	High	High	High	High	High	High	High	High	High	High	High	High	High	High	High	High	High	High	High	High	High	High
P28347	Transcriptional enhancer factor TEF-1 [OS=Homo sapiens]	4.124	3	4	1	High	Peak Found	Peak Found	Not Found	Not Found	Not Found	Peak Found	Peak Found	Peak Found	Peak Found	Peak Found	Peak Found	Peak Found	Peak Found	Peak Found	Peak Found	Peak Found	High	Peak Found	Peak Found	High	High	Not Found	Not Found	Not Found	Not Found
P28370-1	Probable global transcription activator SNF2L1 [OS=Homo sapiens]	9.76	3	10	1	Peak Found	High	Peak Found	Not Found	Not Found	Not Found	High	Peak Found	Not Found	High	Not Found	Not Found	Not Found	Not Found	Peak Found	High	Not Found	Not Found	Not Found	Not Found	High	High	Peak Found	High	Not Found	Peak Found
P28482	mitogen-activated protein kinase 1 [OS=Homo sapiens]	163.268	70	342	10	High	High	High	Peak Found	Peak Found	Peak Found	High	High	High	High	High	High	High	High	High	High	High	High	High	High	High	High	High	High	High	High	Met-loss+Acetyl [N-Term]
P28799	Granulins [OS=Homo sapiens]	38.161	12	51	6	High	Peak Found	High	Peak Found	Peak Found	Not Found	High	High	High	High	High	High	High	High	High	High	High	High	High	High	High	High	High	Peak Found	High	High
P28838	cytosol aminopeptidase [OS=Homo sapiens]	275.823	79	673	30	High	High	High	High	High	High	High	High	High	High	High	High	High	High	High	High	High	High	High	High	High	High	High	High	High	High
P29083	General transcription factor IIE subunit 1 [OS=Homo sapiens]	6.195	7	4	2	Not Found	Not Found	Not Found	Not Found	Not Found	Not Found	Peak Found	High	Not Found	Not Found	Not Found	Not Found	Not Found	Not Found	High	Not Found	Not Found	Peak Found	Peak Found	Peak Found	Not Found	Not Found	Not Found	Not Found	Not Found	Not Found
P29144	Tripeptidyl-peptidase 2 [OS=Homo sapiens]	236.364	43	424	35	High	High	High	High	High	High	High	High	High	High	High	High	High	High	High	High	High	High	High	High	High	High	High	High	High	High	Met-loss+Acetyl [N-Term]
P29218-1	Inositol monophosphatase 1 [OS=Homo sapiens]	50.5	45	122	8	High	High	High	High	Peak Found	High	High	High	High	High	High	High	High	High	High	High	High	High	High	High	High	High	High	High	High	High	Met-loss+Acetyl [N-Term]
P29317	Ephrin type-A receptor 2 [OS=Homo sapiens]	71.031	19	62	11	Peak Found	High	High	Peak Found	Peak Found	Not Found	High	High	High	High	High	High	High	High	High	High	High	Peak Found	High	High	High	High	High	Peak Found	Peak Found	Peak Found
P29323	Ephrin type-B receptor 2 [OS=Homo sapiens]	8.679	3	12	1	Not Found	Not Found	Not Found	Not Found	Not Found	Not Found	Not Found	Not Found	Not Found	Not Found	Not Found	Not Found	Not Found	Not Found	Not Found	Not Found	Not Found	Not Found	Not Found	Not Found	Not Found	Not Found	Not Found	Not Found	Not Found	High
P29353	SHC-transforming protein 1 [OS=Homo sapiens]	68.695	24	60	8	Peak Found	Peak Found	Peak Found	Not Found	Not Found	Not Found	High	High	High	High	High	High	High	High	Peak Found	Peak Found	High	High	Peak Found	High	High	High	High	High	High	Peak Found
P29372	DNA-3-methyladenine glycosylase [OS=Homo sapiens]	18.474	15	6	2	Not Found	Not Found	Not Found	Not Found	Not Found	Not Found	Peak Found	Peak Found	High	High	High	Peak Found	Peak Found	Peak Found	High	Peak Found	Peak Found	Peak Found	Peak Found	Peak Found	Not Found	Not Found	Not Found	Not Found	Not Found	Not Found
P29373	Cellular retinoic acid-binding protein 2 [OS=Homo sapiens]	44.109	62	53	8	Peak Found	High	High	Peak Found	High	High	Peak Found	Peak Found	Not Found	Not Found	Peak Found	Peak Found	Peak Found	Peak Found	Peak Found	High	High	High	High	High	High	High	High	Peak Found	Peak Found	Peak Found
P29401	Transketolase [OS=Homo sapiens]	811.185	87	1953	43	High	High	High	High	High	High	High	High	High	High	High	High	High	High	High	High	High	High	High	High	High	High	High	High	High	High	Acetyl [N-Term]; Carbamyl [K499]
P29474	Nitric oxide synthase, endothelial [OS=Homo sapiens]	7.677	1	4	1	Peak Found	Peak Found	Peak Found	Not Found	Not Found	Peak Found	Peak Found	Peak Found	Peak Found	Peak Found	Peak Found	Peak Found	Peak Found	Peak Found	Peak Found	Peak Found	Peak Found	High	High	Peak Found	Peak Found	Peak Found	Peak Found	Peak Found	High	Peak Found
P29536-1	Leiomodin-1 [OS=Homo sapiens]	15.284	9	17	4	Not Found	Not Found	Peak Found	Not Found	Not Found	Not Found	Peak Found	Peak Found	Not Found	Peak Found	Not Found	High	Peak Found	Peak Found	Peak Found	Peak Found	Peak Found	Not Found	High	High	High	High	High	High	High	High
P29558-1	RNA-binding motif, single-stranded-interacting protein 1 [OS=Homo sapiens]	30.882	17	77	1	Not Found	Not Found	Peak Found	Not Found	Not Found	Not Found	High	Peak Found	Peak Found	Peak Found	Peak Found	Peak Found	Peak Found	Peak Found	High	High	High	Peak Found	High	Peak Found	Peak Found	Not Found	Not Found	Not Found	Not Found	Not Found
P29558-2	Isoform 2 of RNA-binding motif, single-stranded-interacting protein 1 [OS=Homo sapiens]	37.796	18	72	1	Not Found	Not Found	Not Found	Not Found	Not Found	Not Found	Peak Found	High	High	Not Found	Not Found	Not Found	Not Found	Not Found	Peak Found	Peak Found	Peak Found	High	Peak Found	Peak Found	Not Found	Not Found	Not Found	Not Found	Not Found	Peak Found
P29590	Protein PML [OS=Homo sapiens]	133.38	29	247	16	High	High	High	High	High	Peak Found	High	High	High	High	High	High	High	High	High	High	High	High	High	High	High	High	High	High	High	High
P29692	Elongation factor 1-delta [OS=Homo sapiens]	219.277	63	1190	2	High	High	High	High	High	High	High	High	High	High	High	High	High	High	High	High	High	High	High	High	High	High	High	High	High	High	Carbamyl [K189]; Met-loss+Acetyl [N-Term]
P29692-3	Isoform 3 of Elongation factor 1-delta [OS=Homo sapiens]	179.547	64	955	1	High	Peak Found	High	Peak Found	Not Found	Peak Found	High	High	High	High	High	Peak Found	High	High	Peak Found	High	High	High	Peak Found	High	High	High	High	Peak Found	High	Peak Found	Carbamyl [K165]; Met-loss+Acetyl [N-Term]
P29966	Myristoylated alanine-rich C-kinase substrate [OS=Homo sapiens]	351.823	55	652	17	High	High	High	High	High	High	High	High	High	High	High	High	High	High	High	High	High	High	High	High	High	High	High	High	High	High	Carbamyl [K11]
P29992	guanine nucleotide-binding protein subunit alpha-11 [OS=Homo sapiens]	79.378	39	118	8	Peak Found	Peak Found	Peak Found	Peak Found	Peak Found	Peak Found	High	High	High	High	High	High	High	High	High	High	High	High	High	High	High	High	High	High	High	High	Met-loss+Acetyl [N-Term]
P30038	Delta-1-pyrroline-5-carboxylate dehydrogenase, mitochondrial [OS=Homo sapiens]	58.813	19	58	8	Peak Found	High	High	Not Found	Not Found	Not Found	High	Peak Found	High	Peak Found	Peak Found	Peak Found	High	High	High	High	High	High	High	High	High	High	High	High	High	Peak Found
P30040-1	Endoplasmic reticulum resident protein 29 [OS=Homo sapiens]	169.336	68	478	14	High	High	High	High	High	High	High	High	High	High	High	High	High	High	High	High	High	High	High	High	High	High	High	High	High	High
P30041	Peroxiredoxin-6 [OS=Homo sapiens]	298.875	80	1185	22	High	High	High	High	High	High	High	High	High	High	High	High	High	High	High	High	High	High	High	High	High	High	High	High	High	High	Met-loss [N-Term]; Carbamyl [K141]
P30042-1	ES1 protein homolog, mitochondrial [OS=Homo sapiens]	71.01	54	96	7	High	High	High	High	High	High	High	High	High	High	High	High	High	High	High	High	High	High	High	High	High	High	Peak Found	High	High	High
P30043	flavin reductase (NADPH) [OS=Homo sapiens]	134.473	80	187	11	High	High	High	High	Peak Found	Peak Found	High	High	High	High	High	High	High	High	High	High	High	High	High	High	High	High	High	High	High	High
P30044-1	Peroxiredoxin-5, mitochondrial [OS=Homo sapiens]	195.048	76	715	15	High	High	High	High	High	High	High	High	High	High	High	High	High	High	High	High	High	High	High	High	High	High	High	High	High	High
P30046	D-dopachrome decarboxylase [OS=Homo sapiens]	88.27	82	120	6	High	High	High	High	High	High	High	High	High	High	High	High	High	High	High	High	High	High	High	High	High	High	High	High	High	High	Met-loss [N-Term]
P30048	Thioredoxin-dependent peroxide reductase, mitochondrial [OS=Homo sapiens]	181.2	52	452	10	High	High	High	High	High	High	High	High	High	High	High	High	High	High	High	High	High	High	High	High	High	High	High	High	High	High
P30049	ATP synthase subunit delta, mitochondrial [OS=Homo sapiens]	63.561	58	109	4	High	High	High	High	High	Peak Found	High	High	High	High	High	High	High	High	High	High	High	High	High	High	High	High	High	High	High	High
P30050-1	60S ribosomal protein L12 [OS=Homo sapiens]	120.008	59	472	7	High	High	High	High	High	High	High	High	High	High	High	High	High	High	High	High	High	High	High	High	High	High	High	High	High	High
P30084	Enoyl-CoA hydratase, mitochondrial [OS=Homo sapiens]	218.35	70	526	15	High	High	High	High	High	High	High	High	High	High	High	High	High	High	High	High	High	High	High	High	High	High	High	High	High	High
P30085-1	UMP-CMP kinase [OS=Homo sapiens]	143.883	68	491	12	High	High	High	High	High	High	High	High	High	High	High	High	High	High	High	High	High	High	High	High	High	High	High	High	High	High	Carbamyl [K2]
P30086	phosphatidylethanolamine-binding protein 1 [OS=Homo sapiens]	352.532	86	933	16	High	High	High	High	High	High	High	High	High	High	High	High	High	High	High	High	High	High	High	High	High	High	High	High	High	High	Carbamyl [K113]
P30101	Protein disulfide-isomerase A3 [OS=Homo sapiens]	782.619	74	2791	45	High	High	High	High	High	High	High	High	High	High	High	High	High	High	High	High	High	High	High	High	High	High	High	High	High	High	Carbamyl [K152; K305; K425; K496]; Acetyl [K234]
P30153	serine/threonine-protein phosphatase 2A 65 kDa regulatory subunit A alpha isoform [OS=Homo sapiens]	485.015	64	1295	25	High	High	High	High	High	High	High	High	High	High	High	High	High	High	High	High	High	High	High	High	High	High	High	High	High	High	Met-loss+Acetyl [N-Term]
P30154	Serine/threonine-protein phosphatase 2A 65 kDa regulatory subunit A beta isoform [OS=Homo sapiens]	162.67	22	313	3	Not Found	Not Found	Not Found	Not Found	Not Found	Not Found	Peak Found	High	High	High	High	High	Peak Found	Peak Found	High	High	High	High	High	Peak Found	Not Found	Not Found	Not Found	Not Found	Not Found	Not Found	Met-loss+Acetyl [N-Term]
P30405	Peptidyl-prolyl cis-trans isomerase F, mitochondrial [OS=Homo sapiens]	78.604	45	129	5	High	High	High	High	High	Peak Found	High	High	High	High	High	High	High	High	High	High	High	High	High	High	High	High	High	High	High	High
P30419	glycylpeptide N-tetradecanoyltransferase 1 [OS=Homo sapiens]	97.105	29	192	9	High	High	High	Peak Found	Peak Found	Peak Found	High	High	High	High	High	High	High	High	High	High	High	High	High	High	High	High	High	High	High	High
P30447	HLA class I histocompatibility antigen, A-23 alpha chain [OS=Homo sapiens]	166.329	54	250	0	Not Found	Not Found	Not Found	Not Found	Not Found	Not Found	Not Found	Not Found	Not Found	Not Found	Not Found	Not Found	Not Found	Not Found	Not Found	Not Found	Not Found	Not Found	Not Found	Not Found	Not Found	Not Found	Not Found	Not Found	Not Found	Not Found
P30491	HLA class I histocompatibility antigen, B-53 alpha chain [OS=Homo sapiens]	126.983	52	234	1	Not Found	Not Found	Not Found	Not Found	Not Found	Not Found	Peak Found	Peak Found	Not Found	Not Found	Not Found	Peak Found	Peak Found	Not Found	High	High	Peak Found	Not Found	Not Found	Peak Found	Peak Found	Peak Found	Peak Found	Not Found	Not Found	Not Found
P30504	HLA class I histocompatibility antigen, Cw-4 alpha chain [OS=Homo sapiens]	69.897	34	147	1	Not Found	Not Found	Not Found	Not Found	Not Found	Not Found	High	High	Not Found	Not Found	Not Found	Not Found	Not Found	Not Found	Not Found	Not Found	Not Found	Peak Found	Peak Found	Peak Found	Not Found	Not Found	Not Found	Not Found	Not Found	Not Found
P30519	Heme oxygenase 2 [OS=Homo sapiens]	111.815	53	142	10	High	High	High	Peak Found	Peak Found	High	High	High	High	High	High	High	High	High	High	High	High	High	High	High	High	High	High	High	High	High	Met-loss+Acetyl [N-Term]
P30520	adenylosuccinate synthetase isozyme 2 [OS=Homo sapiens]	90.702	39	201	13	High	High	Peak Found	Peak Found	Peak Found	Peak Found	High	High	High	High	High	High	High	High	High	High	High	High	High	High	High	High	High	High	High	High	Met-loss+Acetyl [N-Term]
P30533	alpha-2-macroglobulin receptor-associated protein [OS=Homo sapiens]	143.235	42	385	19	High	High	High	High	High	High	High	High	High	High	High	High	High	High	High	High	High	High	High	High	High	High	High	High	High	High	Acetyl [K47]
P30536	translocator protein [OS=Homo sapiens]	28.899	34	49	3	High	Peak Found	High	High	High	High	High	High	High	High	High	High	High	High	High	High	High	Not Found	Not Found	Not Found	High	High	Peak Found	High	High	High	Met-loss [N-Term]
P30566	adenylosuccinate lyase [OS=Homo sapiens]	122.394	54	192	15	High	High	High	High	High	High	High	High	High	High	High	High	High	High	High	High	High	High	High	High	High	High	High	High	High	High	Met-loss+Acetyl [N-Term]
P30613	Pyruvate kinase PKLR [OS=Homo sapiens]	25.239	7	206	1	Not Found	Not Found	Not Found	Not Found	Not Found	Not Found	Not Found	Not Found	Not Found	Not Found	High	Not Found	Not Found	High	Not Found	Not Found	Not Found	Not Found	Not Found	Not Found	Not Found	Not Found	Not Found	Not Found	Not Found	Not Found
P30622-2	Isoform 3 of CAP-Gly domain-containing linker protein 1 [OS=Homo sapiens]	105.243	19	201	19	High	High	High	Peak Found	Peak Found	High	High	High	High	High	High	High	High	High	High	High	High	High	High	High	High	High	High	High	High	High
P30626-1	Sorcin [OS=Homo sapiens]	38.858	55	95	8	High	Peak Found	High	Peak Found	Peak Found	High	High	High	High	High	High	High	High	High	High	High	High	High	High	High	High	High	High	Peak Found	Peak Found	Peak Found
P30740	Leukocyte elastase inhibitor [OS=Homo sapiens]	70.023	36	93	9	High	High	High	Peak Found	Not Found	Peak Found	High	High	High	High	High	High	High	High	High	High	High	High	Peak Found	High	High	High	High	Peak Found	Peak Found	Peak Found	Acetyl [N-Term]
P30825	High affinity cationic amino acid transporter 1 [OS=Homo sapiens]	6.758	4	4	2	Not Found	Not Found	Not Found	Not Found	Not Found	Not Found	Peak Found	Peak Found	High	High	Peak Found	Peak Found	Peak Found	Peak Found	Peak Found	High	Peak Found	Not Found	Not Found	Not Found	Peak Found	Peak Found	Peak Found	Peak Found	Peak Found	Peak Found
P30837	Aldehyde dehydrogenase X, mitochondrial [OS=Homo sapiens]	95.968	37	140	13	Peak Found	High	Peak Found	Peak Found	Not Found	Not Found	High	High	High	High	High	High	High	High	High	High	High	High	High	High	High	High	High	High	High	High
P30876	DNA-directed RNA polymerase II subunit RPB2 [OS=Homo sapiens]	56.768	13	24	8	High	High	High	Peak Found	Peak Found	Peak Found	High	High	High	High	High	Peak Found	High	High	High	High	High	Peak Found	Peak Found	Peak Found	High	High	High	Peak Found	Peak Found	Peak Found
P31040	Succinate dehydrogenase [ubiquinone] flavoprotein subunit, mitochondrial [OS=Homo sapiens]	187.782	52	365	21	High	High	High	High	High	High	High	High	High	High	High	High	High	High	High	High	High	High	High	High	High	High	High	High	High	High
P31146	Coronin-1A [OS=Homo sapiens]	8.757	5	4	1	High	Not Found	Not Found	High	Not Found	Not Found	Not Found	Not Found	Not Found	Not Found	Not Found	Not Found	Not Found	Not Found	Not Found	Not Found	Not Found	Not Found	Not Found	Not Found	Not Found	Not Found	Not Found	Not Found	Not Found	Not Found
P31150	Rab GDP dissociation inhibitor alpha [OS=Homo sapiens]	435.323	79	836	21	High	High	High	Peak Found	High	High	High	High	High	High	High	High	High	High	High	High	High	High	High	High	High	High	High	High	High	High	Acetyl [K174]; Carbamyl [K174]; Acetyl [N-Term]
P31153	S-adenosylmethionine synthase isoform type-2 [OS=Homo sapiens]	125.246	49	241	14	High	High	High	High	High	High	High	High	High	High	High	High	High	High	High	High	High	High	High	High	High	High	High	High	High	High
P31323	cAMP-dependent protein kinase type II-beta regulatory subunit [OS=Homo sapiens]	63.63	36	59	6	High	Peak Found	High	Not Found	Not Found	Not Found	High	High	High	High	High	Peak Found	Peak Found	Peak Found	Peak Found	Peak Found	Peak Found	High	High	High	Peak Found	High	High	Peak Found	Peak Found	Peak Found	Met-loss+Acetyl [N-Term]
P31327-1	Carbamoyl-phosphate synthase [ammonia], mitochondrial [OS=Homo sapiens]	17.136	3	22	4	High	High	High	High	High	High	Not Found	Not Found	Not Found	Not Found	Peak Found	Peak Found	Peak Found	Peak Found	Peak Found	Peak Found	Not Found	Peak Found	Peak Found	Peak Found	High	High	Peak Found	Not Found	Peak Found	Peak Found
P31350-1	ribonucleoside-diphosphate reductase subunit M2 [OS=Homo sapiens]	36.554	22	19	5	Not Found	Peak Found	Not Found	Not Found	Not Found	Not Found	High	Peak Found	High	High	High	Not Found	Not Found	Not Found	Peak Found	Peak Found	Peak Found	Not Found	Peak Found	Not Found	Peak Found	Not Found	Not Found	Not Found	Not Found	Not Found
P31483	nucleolysin TIA-1 isoform p40 [OS=Homo sapiens]	37.046	17	81	2	Peak Found	High	Peak Found	Peak Found	Peak Found	High	High	High	High	High	High	Not Found	Not Found	Not Found	High	High	High	High	High	High	High	High	High	Not Found	Not Found	Not Found
P31641	Sodium- and chloride-dependent taurine transporter [OS=Homo sapiens]	9.384	3	19	1	Peak Found	High	High	Not Found	Not Found	Not Found	High	High	High	High	High	High	High	High	High	High	High	Not Found	Not Found	Peak Found	High	High	High	Peak Found	Peak Found	Peak Found
P31689-1	DnaJ homolog subfamily A member 1 [OS=Homo sapiens]	176.236	54	345	17	High	High	High	High	High	High	High	High	High	High	High	High	High	High	High	High	High	High	High	High	High	High	High	High	High	High	Met-loss [N-Term]
P31749	RAC-alpha serine/threonine-protein kinase [OS=Homo sapiens]	14.683	9	31	3	Peak Found	Not Found	Peak Found	Not Found	Not Found	Not Found	High	High	High	High	High	High	High	High	High	High	High	High	High	High	High	High	High	High	High	High
P31751	RAC-beta serine/threonine-protein kinase [OS=Homo sapiens]	11.352	9	3	2	Not Found	Not Found	Not Found	Not Found	Not Found	Not Found	High	Peak Found	Not Found	Not Found	Peak Found	Peak Found	Peak Found	Peak Found	Peak Found	High	Peak Found	Peak Found	Peak Found	Peak Found	Not Found	Not Found	Not Found	High	Not Found	Not Found
P31930	Cytochrome b-c1 complex subunit 1, mitochondrial [OS=Homo sapiens]	248.605	62	573	19	High	High	High	High	High	High	High	High	High	High	High	High	High	High	High	High	High	High	High	High	High	High	High	High	High	High
P31937	3-hydroxyisobutyrate dehydrogenase, mitochondrial [OS=Homo sapiens]	110.097	66	196	15	High	High	High	High	High	High	High	High	High	High	High	High	High	High	High	High	High	High	High	High	High	High	High	High	High	High
P31939	bifunctional purine biosynthesis protein purH [OS=Homo sapiens]	424.806	83	793	37	High	High	High	High	High	High	High	High	High	High	High	High	High	High	High	High	High	High	High	High	High	High	High	High	High	High	Met-loss [N-Term]; Acetyl [N-Term]
P31942	Heterogeneous nuclear ribonucleoprotein H3 [OS=Homo sapiens]	202.678	59	399	11	High	High	High	High	High	High	High	High	High	High	High	High	High	High	High	High	High	High	High	High	High	High	High	High	High	High
P31943	Heterogeneous nuclear ribonucleoprotein H [OS=Homo sapiens]	394.462	59	1264	11	High	High	High	High	High	High	High	High	High	High	High	High	High	High	High	High	High	High	High	High	High	High	High	High	High	High	Met-loss [N-Term]; Met-loss+Acetyl [N-Term]; Acetyl [N-Term]
P31946	14-3-3 protein beta/alpha [OS=Homo sapiens]	505.704	82	1557	1	High	High	High	Peak Found	Peak Found	Peak Found	High	High	High	High	High	High	Peak Found	High	High	High	High	High	High	High	Peak Found	High	High	High	High	High	Met-loss+Acetyl [N-Term]; Acetyl [N-Term]
P31946-2	Isoform Short of 14-3-3 protein beta/alpha [OS=Homo sapiens]	497.685	82	1569	1	High	Peak Found	High	High	High	High	High	High	High	Peak Found	Peak Found	High	High	High	High	High	High	High	High	High	High	High	High	High	High	High	Acetyl [N-Term]
P31947-1	14-3-3 protein sigma [OS=Homo sapiens]	56.611	30	455	2	Not Found	High	High	High	High	High	High	High	Peak Found	High	High	High	Not Found	Not Found	Not Found	High	Not Found	High	Not Found	High	High	High	High	High	High	High
P31948	stress-induced-phosphoprotein 1 [OS=Homo sapiens]	489.702	64	1162	47	High	High	High	High	High	High	High	High	High	High	High	High	High	High	High	High	High	High	High	High	High	High	High	High	High	High	Carbamyl [K210]; Acetyl [N-Term]
P31949	protein S100-A11 [OS=Homo sapiens]	180.613	87	506	8	High	High	High	High	High	High	High	High	High	High	High	High	High	High	High	High	High	High	High	High	High	High	High	High	High	High	Acetyl [K66]; Carbamyl [K66]
P32119	Peroxiredoxin-2 [OS=Homo sapiens]	347.36	84	1088	15	High	High	High	High	High	High	High	High	High	High	High	High	High	High	High	High	High	High	High	High	High	High	High	High	High	High	Acetyl [K67; K92]; Carbamyl [K67; K92]
P32189-1	Isoform 1 of Glycerol kinase [OS=Homo sapiens]	21.814	21	13	6	High	High	Peak Found	Not Found	Peak Found	Not Found	Peak Found	Peak Found	High	High	High	Peak Found	Peak Found	High	Not Found	Not Found	Not Found	Peak Found	Peak Found	High	High	Peak Found	High	High	Peak Found	Peak Found
P32298	G protein-coupled receptor kinase 4 [OS=Homo sapiens]	6.758	2	5	1	Not Found	Not Found	Not Found	Not Found	Not Found	Not Found	Peak Found	Peak Found	Peak Found	High	Peak Found	Peak Found	Peak Found	High	Not Found	Peak Found	Peak Found	High	Peak Found	High	Not Found	Not Found	Not Found	High	Not Found	Not Found	Acetyl [N-Term]
P32321	deoxycytidylate deaminase [OS=Homo sapiens]	41.741	48	81	6	High	High	High	Peak Found	Peak Found	Peak Found	High	High	High	High	High	High	High	High	High	High	High	High	High	High	High	High	High	High	High	High
P32322	Pyrroline-5-carboxylate reductase 1, mitochondrial [OS=Homo sapiens]	74.1	46	138	10	High	High	High	High	High	High	High	High	High	High	High	High	High	High	High	High	High	High	High	High	High	High	High	High	High	High	Met-loss+Acetyl [N-Term]
P32456	Guanylate-binding protein 2 [OS=Homo sapiens]	37.04	11	32	2	High	Not Found	Peak Found	Not Found	Not Found	Not Found	High	High	Peak Found	Peak Found	High	Peak Found	Peak Found	Peak Found	High	High	Peak Found	Peak Found	Peak Found	High	Peak Found	Peak Found	Not Found	Not Found	Not Found	Not Found
P32969	60S ribosomal protein L9 [OS=Homo sapiens]	266.39	66	597	12	High	High	High	High	High	High	High	High	High	High	High	High	High	High	High	High	High	High	High	High	High	High	High	High	High	High	Carbamyl [K174]
P33121	Long-chain-fatty-acid--CoA ligase 1 [OS=Homo sapiens]	43.564	18	20	7	High	Peak Found	Peak Found	Not Found	Not Found	Not Found	High	High	Peak Found	Peak Found	Peak Found	Peak Found	Peak Found	High	High	Peak Found	High	Peak Found	Peak Found	Peak Found	Peak Found	Peak Found	Peak Found	High	High	High
P33176	Kinesin-1 heavy chain [OS=Homo sapiens]	508.83	63	984	43	High	High	High	High	High	High	High	High	High	High	High	High	High	High	High	High	High	High	High	High	High	High	High	High	High	High	Met-loss+Acetyl [N-Term]
P33240	cleavage stimulation factor subunit 2 [OS=Homo sapiens]	51.461	25	67	8	High	High	High	High	Peak Found	High	High	High	High	High	High	High	High	High	High	High	High	High	High	High	High	High	High	Peak Found	Peak Found	Peak Found
P33316-2	Isoform 2 of Deoxyuridine 5'-triphosphate nucleotidohydrolase, mitochondrial [OS=Homo sapiens]	68.898	70	127	1	Peak Found	High	Peak Found	Peak Found	Peak Found	Peak Found	Peak Found	Peak Found	Peak Found	Peak Found	Peak Found	Peak Found	Peak Found	Peak Found	Peak Found	High	Peak Found	Peak Found	Peak Found	Peak Found	Peak Found	Peak Found	High	Peak Found	Peak Found	Peak Found	Met-loss [N-Term]
P33316-3	Deoxyuridine 5'-triphosphate nucleotidohydrolase, mitochondrial [OS=Homo sapiens]	68.264	47	136	1	Peak Found	Not Found	Not Found	Not Found	Not Found	Not Found	High	High	Peak Found	Not Found	Peak Found	Peak Found	Not Found	High	High	High	High	High	High	High	High	High	High	Peak Found	Peak Found	Peak Found
P33527	Multidrug resistance-associated protein 1 [OS=Homo sapiens]	101.046	14	51	12	High	High	Peak Found	Not Found	Not Found	Not Found	High	High	High	High	High	High	High	High	Peak Found	High	Peak Found	Peak Found	Peak Found	Peak Found	Peak Found	Peak Found	High	Peak Found	Peak Found	High
P33908	Mannosyl-oligosaccharide 1,2-alpha-mannosidase IA [OS=Homo sapiens]	7.923	4	6	1	Not Found	Not Found	Not Found	Not Found	Not Found	Not Found	Peak Found	Peak Found	Peak Found	Not Found	High	High	Peak Found	Not Found	Peak Found	Peak Found	Peak Found	High	High	High	Not Found	Peak Found	Not Found	High	Not Found	Peak Found	Met-loss [N-Term]
P33947-1	ER lumen protein-retaining receptor 2 [OS=Homo sapiens]	8.216	8	9	1	Not Found	Not Found	Not Found	Not Found	Not Found	Not Found	Peak Found	Peak Found	Peak Found	Not Found	High	Peak Found	Not Found	High	High	Peak Found	Peak Found	Peak Found	High	High	Peak Found	Not Found	High	High	High	High
P33991	DNA replication licensing factor MCM4 [OS=Homo sapiens]	123.433	30	108	15	High	High	High	Peak Found	Peak Found	High	High	High	High	High	High	High	High	High	High	High	High	High	High	High	High	High	High	Peak Found	Peak Found	Peak Found
P33992	DNA replication licensing factor mcm5 [OS=Homo sapiens]	29.012	15	22	7	High	High	High	High	High	High	Peak Found	Peak Found	High	High	High	Peak Found	Peak Found	Peak Found	Peak Found	Peak Found	Peak Found	High	Peak Found	Peak Found	High	Peak Found	High	Not Found	Not Found	Peak Found
P33993-1	DNA replication licensing factor MCM7 [OS=Homo sapiens]	95.128	34	74	16	High	High	High	High	High	Peak Found	High	High	High	High	High	High	High	Peak Found	High	High	High	High	High	High	High	High	Peak Found	Not Found	Not Found	Not Found
P34059	N-acetylgalactosamine-6-sulfatase [OS=Homo sapiens]	12.408	7	20	2	Peak Found	Not Found	Peak Found	Not Found	Not Found	Not Found	Peak Found	High	High	High	High	Peak Found	High	Peak Found	High	High	Peak Found	High	High	High	Not Found	Peak Found	Peak Found	High	High	High
P34741	syndecan-2 [OS=Homo sapiens]	4.997	7	2	1	Not Found	Not Found	Not Found	Not Found	Not Found	Not Found	Not Found	Not Found	Not Found	Not Found	Not Found	Not Found	Not Found	High	Not Found	Not Found	Not Found	Not Found	Not Found	Not Found	High	Not Found	Not Found	Not Found	Not Found	Not Found
P34896-1	Serine hydroxymethyltransferase, cytosolic [OS=Homo sapiens]	17.983	5	31	1	High	High	High	Not Found	Not Found	Not Found	Peak Found	Not Found	High	Peak Found	Peak Found	Not Found	Peak Found	Peak Found	Peak Found	High	Peak Found	Not Found	Peak Found	Not Found	Not Found	Not Found	Not Found	Not Found	Not Found	Not Found
P34897-1	Serine hydroxymethyltransferase, mitochondrial [OS=Homo sapiens]	306.545	64	594	24	High	High	High	High	High	High	High	High	High	High	High	High	High	High	High	High	High	High	High	High	High	High	High	High	High	High
P34931	Heat shock 70 kDa protein 1-like [OS=Homo sapiens]	207.406	27	850	1	Peak Found	Peak Found	Peak Found	Not Found	Peak Found	Not Found	High	Peak Found	High	Peak Found	High	Peak Found	Peak Found	Peak Found	Peak Found	Peak Found	High	Peak Found	Peak Found	Peak Found	Peak Found	Peak Found	Peak Found	Peak Found	High	Peak Found
P34932	Heat shock 70 kDa protein 4 [OS=Homo sapiens]	704.939	80	1384	56	High	High	High	High	High	High	High	High	High	High	High	High	High	High	High	High	High	High	High	High	High	High	High	High	High	High	Met-loss+Acetyl [N-Term]
P34947	G protein-coupled receptor kinase 5 [OS=Homo sapiens]	7.554	2	12	1	Not Found	Not Found	Not Found	Not Found	Not Found	Not Found	High	High	High	Peak Found	High	High	High	Peak Found	High	High	High	Peak Found	High	Not Found	Not Found	Not Found	High	Not Found	Not Found	High	Acetyl [N-Term]
P34949	mannose-6-phosphate isomerase [OS=Homo sapiens]	28.095	19	26	4	Not Found	Not Found	Not Found	Not Found	Not Found	Not Found	High	High	Peak Found	High	High	High	High	High	High	High	High	High	High	High	Not Found	Not Found	Not Found	Peak Found	High	High
P35030	Trypsin-3 [OS=Homo sapiens]	12.075	4	40	1	High	High	High	High	Not Found	Peak Found	High	High	High	High	High	High	High	High	High	High	High	High	High	Peak Found	High	High	High	High	High	High
P35080-1	Profilin-2 [OS=Homo sapiens]	102.386	75	250	1	Peak Found	Peak Found	Peak Found	Not Found	Not Found	Not Found	High	High	High	High	High	High	High	High	High	High	High	High	High	High	High	Peak Found	High	High	High	High	Met-loss+Acetyl [N-Term]
P35080-2	Isoform IIb of Profilin-2 [OS=Homo sapiens]	127.634	89	386	5	High	High	High	High	High	High	High	High	High	High	High	High	High	High	High	High	High	High	High	High	High	High	High	High	High	High	Met-loss+Acetyl [N-Term]
P35221	Catenin alpha-1 [OS=Homo sapiens]	445.737	61	745	29	High	High	High	High	High	High	High	High	High	High	High	High	High	High	High	High	High	High	High	High	High	High	High	High	High	High	Met-loss+Acetyl [N-Term]
P35222	Catenin beta-1 [OS=Homo sapiens]	189.022	46	356	19	High	High	High	High	High	Peak Found	High	High	High	High	High	High	High	High	High	High	High	High	High	High	High	High	High	High	High	High	Met-loss+Acetyl [N-Term]
P35232	Prohibitin [OS=Homo sapiens]	287.133	82	801	16	High	High	High	High	High	High	High	High	High	High	High	High	High	High	High	High	High	High	High	High	High	High	High	High	High	High	Acetyl [K240]; Carbamyl [K240]
P35237	serpin B6 [OS=Homo sapiens]	311.009	82	638	23	High	High	High	High	High	High	High	High	High	High	High	High	High	High	High	High	High	High	High	High	High	High	High	High	High	High	Acetyl [N-Term]
P35241-1	radixin [OS=Homo sapiens]	301.155	59	1132	20	High	High	High	High	High	High	High	High	High	High	High	High	High	High	High	High	High	High	High	High	High	High	High	High	High	High	Carbamyl [K53; K263; K296]
P35244	Replication protein A 14 kDa subunit [OS=Homo sapiens]	44.824	78	75	6	High	High	High	Not Found	Not Found	Not Found	High	High	High	High	High	High	High	High	High	High	High	High	High	High	High	High	High	Peak Found	Peak Found	Peak Found	Met-loss+Acetyl [N-Term]
P35249	replication factor C subunit 4 [OS=Homo sapiens]	5.38	6	2	1	Not Found	Not Found	Not Found	Not Found	Not Found	Not Found	Not Found	Not Found	High	Not Found	Not Found	Not Found	Not Found	Not Found	Not Found	Not Found	Not Found	Not Found	Not Found	High	Not Found	Not Found	Not Found	Not Found	Not Found	Not Found
P35250-1	Replication factor C subunit 2 [OS=Homo sapiens]	13.271	6	15	2	High	High	Peak Found	Peak Found	Not Found	Not Found	Peak Found	Peak Found	High	High	High	Peak Found	High	High	Peak Found	High	High	High	High	High	Peak Found	Peak Found	High	Peak Found	Not Found	Peak Found
P35268	60S ribosomal protein L22 [OS=Homo sapiens]	91.766	63	371	9	High	High	High	High	High	High	High	High	High	High	High	High	High	High	High	High	High	High	High	High	High	High	High	High	High	High
P35269	General transcription factor iif subunit 1 [OS=Homo sapiens]	30.282	13	44	5	Peak Found	Peak Found	High	Not Found	Not Found	Not Found	High	High	High	High	High	Peak Found	Peak Found	Peak Found	High	High	High	High	High	High	High	High	High	Peak Found	Peak Found	Peak Found	Met-loss+Acetyl [N-Term]
P35270	Sepiapterin reductase [OS=Homo sapiens]	35.491	21	28	3	Not Found	Not Found	Not Found	Not Found	Not Found	Not Found	High	High	High	High	Peak Found	Peak Found	High	Peak Found	Peak Found	Peak Found	High	Peak Found	Peak Found	High	High	High	Peak Found	High	High	High
P35520-1	Cystathionine beta-synthase [OS=Homo sapiens]	94.575	40	99	9	High	High	High	High	Peak Found	High	High	High	High	High	High	High	High	High	High	High	High	High	High	High	High	High	High	High	High	High	Met-loss [N-Term]
P35527	Keratin, type I cytoskeletal 9 [OS=Homo sapiens]	199.398	65	317	21	High	High	High	High	High	High	High	High	High	High	High	High	High	High	High	High	High	High	High	High	High	High	High	High	High	High
P35555	Fibrillin-1 [OS=Homo sapiens]	191.098	16	99	31	Peak Found	High	Peak Found	Peak Found	Peak Found	Peak Found	High	High	High	Peak Found	Peak Found	High	High	High	High	High	High	High	High	High	Peak Found	Peak Found	High	High	High	High
P35573-1	glycogen debranching enzyme [OS=Homo sapiens]	16.342	3	9	3	Peak Found	Peak Found	Peak Found	Not Found	Not Found	Peak Found	Peak Found	Peak Found	Peak Found	Peak Found	Peak Found	High	Peak Found	High	Peak Found	High	Peak Found	Peak Found	Peak Found	Peak Found	Peak Found	Peak Found	Peak Found	High	High	High
P35579-1	Myosin-9 [OS=Homo sapiens]	3620.69	73	11556	170	High	High	High	High	High	High	High	High	High	High	High	High	High	High	High	High	High	High	High	High	High	High	High	High	High	High	Carbamyl [K8; K30; K47; K186; K682; K910; K975; K1052; K1081; K1145; K1249; K1372; K1445; K1867]; Acetyl [K8; K186; K910; K975]; Met-loss+Acetyl [N-Term]; Met-loss [N-Term]
P35580	Myosin-10 [OS=Homo sapiens]	694.024	42	1569	44	High	High	High	Peak Found	High	Peak Found	High	High	High	High	High	High	High	High	High	High	High	High	High	High	High	High	High	High	High	High	Carbamyl [K689; K1452]
P35606	Coatomer subunit beta' [OS=Homo sapiens]	348.244	70	777	43	High	High	High	High	High	High	High	High	High	High	High	High	High	High	High	High	High	High	High	High	High	High	High	High	High	High
P35610	sterol O-acyltransferase 1 [OS=Homo sapiens]	32.987	15	45	6	High	High	High	Peak Found	Peak Found	Peak Found	High	High	High	High	High	High	High	High	High	High	High	Peak Found	Peak Found	High	Peak Found	Peak Found	High	High	High	High
P35611-1	Alpha-adducin [OS=Homo sapiens]	127.775	34	184	16	High	High	High	Peak Found	Peak Found	Peak Found	High	High	High	High	High	High	High	High	High	High	High	High	High	High	High	High	High	High	High	High
P35613	Basigin [OS=Homo sapiens]	117.96	32	251	8	High	High	High	High	High	High	High	High	High	High	High	High	High	High	High	High	High	High	High	High	High	High	High	High	High	High
P35625	Metalloproteinase inhibitor 3 [OS=Homo sapiens]	48.543	54	58	10	Peak Found	Not Found	Not Found	Not Found	Not Found	Peak Found	Peak Found	Peak Found	Peak Found	Peak Found	Peak Found	High	Peak Found	High	High	High	High	Peak Found	Peak Found	Peak Found	High	High	High	High	High	High
P35637-1	RNA-binding protein FUS [OS=Homo sapiens]	195.173	24	399	10	High	High	High	High	High	High	High	High	High	High	High	High	High	High	High	High	High	High	High	High	High	High	High	High	High	High
P35658-1	Nuclear pore complex protein Nup214 [OS=Homo sapiens]	65.625	9	56	10	High	High	Peak Found	High	Peak Found	High	High	High	High	High	High	High	Peak Found	High	High	High	High	High	High	High	High	High	High	Peak Found	Peak Found	Peak Found
P35659-1	Protein DEK [OS=Homo sapiens]	42.709	29	96	8	Peak Found	High	High	Peak Found	High	High	High	High	High	High	High	High	High	High	High	High	High	High	High	High	High	High	High	Not Found	Peak Found	Peak Found	Met-loss+Acetyl [N-Term]
P35813	Protein phosphatase 1A [OS=Homo sapiens]	31.119	17	45	2	Peak Found	Peak Found	Peak Found	Not Found	Not Found	Not Found	High	High	High	Peak Found	Peak Found	Peak Found	High	High	Peak Found	High	High	High	High	High	High	High	High	High	High	High
P35869	Aryl hydrocarbon receptor [OS=Homo sapiens]	10.013	2	7	1	Not Found	Not Found	Not Found	Not Found	Not Found	Not Found	Not Found	Not Found	Not Found	Not Found	Not Found	Not Found	Not Found	Not Found	High	High	High	High	Not Found	Not Found	Not Found	High	High	Not Found	Not Found	Not Found
P35908	Keratin, type II cytoskeletal 2 epidermal [OS=Homo sapiens]	164.326	62	225	20	High	High	High	High	High	High	High	High	High	High	High	High	High	High	High	High	High	High	High	High	High	High	High	High	High	High
P35914	Hydroxymethylglutaryl-CoA lyase, mitochondrial [OS=Homo sapiens]	46.649	28	52	6	High	High	Peak Found	Not Found	Not Found	High	High	High	High	High	High	High	High	High	High	High	High	High	High	High	High	High	High	High	High	High
P35998	26S proteasome regulatory subunit 7 [OS=Homo sapiens]	229.442	69	608	28	High	High	High	High	High	High	High	High	High	High	High	High	High	High	High	High	High	High	High	High	High	High	High	High	High	High	Met-loss [N-Term]
P36269-1	glutathione hydrolase 5 proenzyme [OS=Homo sapiens]	16.963	7	14	3	High	Peak Found	Peak Found	Not Found	Not Found	Not Found	Not Found	Peak Found	Not Found	Not Found	Peak Found	High	High	High	Peak Found	Peak Found	Peak Found	Peak Found	Peak Found	Peak Found	Peak Found	Peak Found	Peak Found	Not Found	Not Found	Not Found
P36404	ADP-ribosylation factor-like protein 2 [OS=Homo sapiens]	4.536	7	5	1	Not Found	Not Found	Not Found	Not Found	Not Found	Not Found	High	Peak Found	Peak Found	Peak Found	Peak Found	Peak Found	Peak Found	Peak Found	Peak Found	Peak Found	High	Peak Found	High	High	Not Found	Peak Found	Not Found	Peak Found	Not Found	Not Found
P36405	ADP-ribosylation factor-like protein 3 [OS=Homo sapiens]	103.532	79	194	9	High	High	High	Peak Found	Peak Found	Peak Found	High	High	High	High	High	High	High	High	High	High	High	High	High	High	High	High	High	High	High	High
P36507	Dual specificity mitogen-activated protein kinase kinase 2 [OS=Homo sapiens]	130.864	47	225	8	High	High	High	High	High	Peak Found	High	High	High	High	High	High	High	High	High	High	High	High	High	High	High	High	High	High	High	High
P36542-1	ATP synthase subunit gamma, mitochondrial [OS=Homo sapiens]	67.23	41	251	10	High	High	High	High	High	High	High	High	High	High	High	High	High	High	High	High	High	High	High	High	High	High	High	High	High	High
P36543	V-type proton ATPase subunit E 1 [OS=Homo sapiens]	95.253	61	211	12	High	High	High	High	High	Peak Found	High	High	High	High	High	High	High	High	High	High	High	High	High	High	High	High	High	High	High	High	Met-loss+Acetyl [N-Term]
P36551	Oxygen-dependent coproporphyrinogen-III oxidase, mitochondrial [OS=Homo sapiens]	52.896	33	132	12	Peak Found	High	High	Peak Found	Peak Found	Peak Found	High	High	High	High	High	High	High	High	High	High	High	High	High	High	High	High	High	High	High	High
[truncated: 3,255 more rows]

## Sheet: Cells HGvLG Up
Accession	Description	# Unique Peptides	Abundance Ratio: (HG) / (LG)	Abundance Ratio Adj. P-Value: (HG) / (LG)	Abundances (Grouped): HG	Abundances (Grouped): LG
[truncated: 137 more rows]

[truncated: 1 more sheets: Cells HGvLG Down]
